# Supplementary material for: Ancient Genomes Reveal the Origins and Kinship Organisation of Late Bronze Age Populations in Northeastern China
Source: Research Square preprint supplement (doi:10.21203/rs.3.rs-7908178/v1), 2026-02-11
Supplement: Supplementary file 1 [file 3a0fe83c7854f075ee0debc0.xlsx]

## Sheet: Sheet3
Pop1	Pop2	Pop3	Pop4	F4	Z	nBABA	nABBA	nSNPs
Mbuti.DG	Eskimo_Chaplin.DG	Eskimo_Naukan.DG	DST_total	-0.010447	-22.993	49365	60211	1038237
Mbuti.DG	Eskimo_Chaplin.DG	Eskimo_Sireniki.DG	DST_total	-0.010405	-22.171	49293	60096	1038252
Mbuti.DG	Eskimo_Chaplin.DG	Koryak.SG	DST_total	-0.005712	-12.94	50627	56557	1038201
Mbuti.DG	Eskimo_Chaplin.DG	Itelman.DG	DST_total	-0.005059	-9.738	51382	56627	1036875
Mbuti.DG	Baikal_EN	Mongolia_N_North	DST_total	-0.001998	-9.42	50034	52044	1006270
Mbuti.DG	Eskimo_Chaplin.DG	Saqqaq.SG	DST_total	-0.004384	-7.816	48393	52695	981526
Mbuti.DG	Eskimo_Chaplin.DG	Karitiana.DG	DST_total	-0.003614	-7.62	53457	57209	1038287
Mbuti.DG	Eskimo_Chaplin.DG	Mixe.DG	DST_total	-0.003219	-6.852	53766	57108	1038254
Mbuti.DG	JPT.SG	Japanese.DG	DST_total	-0.001329	-6.577	52857	54238	1039362
Mbuti.DG	JPT.SG	CHB.SG	DST_total	-0.000874	-5.68	54484	55412	1062391
Mbuti.DG	Mongolia_N_North	Baikal_EN	DST_total	-0.00115	-5.259	50887	52044	1006270
Mbuti.DG	Eskimo_Chaplin.DG	Nahua.DG	DST_total	-0.002791	-5.181	54014	56908	1037103
Mbuti.DG	YR_LBIA	CHB.SG	DST_total	-0.00092	-5.147	53692	54663	1055465
Mbuti.DG	DevilsCave_N	LetuchayaMysh_7000BP	DST_total	-0.002679	-5.108	10451	11052	224432
Mbuti.DG	Mongolia_N_North	Mongolia_N_East	DST_total	-0.001403	-5.03	45610	46897	916960
Mbuti.DG	YR_LBIA	Miaozigou_MN	DST_total	-0.001865	-4.958	15535	16121	314293
Mbuti.DG	YR_LBIA	CHS.SG	DST_total	-0.00082	-4.51	53872	54737	1055465
Mbuti.DG	JPT.SG	CHS.SG	DST_total	-0.000695	-4.442	54704	55442	1062391
Mbuti.DG	UstBelaya_EBA	UstIda_LN	DST_total	-0.001358	-4.297	48592	49875	944707
Mbuti.DG	UstBelaya_EBA	Mongolia_N_North	DST_total	-0.001052	-4.286	48082	49097	964579
Mbuti.DG	YR_LBIA	Han.DG	DST_total	-0.000901	-4.056	53878	54829	1055454
Mbuti.DG	YR_LN	Miaozigou_MN	DST_total	-0.001411	-3.997	15705	16150	315412
Mbuti.DG	YR_LBIA	Upper_YR_IA	DST_total	-0.000946	-3.887	51599	52562	1017639
Mbuti.DG	Eskimo_Chaplin.DG	Clovis.SG	DST_total	-0.002194	-3.715	54467	56733	1033194
Mbuti.DG	Boisman_MN	LetuchayaMysh_7000BP	DST_total	-0.001611	-3.69	10239	10591	218694
Mbuti.DG	YR_MN	Miaozigou_MN	DST_total	-0.00153	-3.664	15609	16090	314339
Mbuti.DG	Yumin	Mongolia_N_East	DST_total	-0.001379	-3.532	38587	39664	781634
Mbuti.DG	YR_LBIA	Korean.DG	DST_total	-0.000894	-3.421	52087	53010	1032898
Mbuti.DG	Baikal_EN	Mongolia_N_East	DST_total	-0.000805	-3.27	46712	47464	934725
Mbuti.DG	Mongolia_N_East	AR_EN	DST_total	-0.001322	-3.232	15605	16024	317132
Mbuti.DG	YR_LBIA	Shimao_LN	DST_total	-0.000869	-3.183	52872	53780	1044288
Mbuti.DG	YR_LN	Shimao_LN	DST_total	-0.000839	-3.158	53328	54209	1050023
Mbuti.DG	YR_MN	Shimao_LN	DST_total	-0.000882	-3.078	53002	53923	1045001
Mbuti.DG	WLR_LN	Miaozigou_MN	DST_total	-0.00139	-2.864	13563	13944	274621
Mbuti.DG	Baikal_EN	AR_EN	DST_total	-0.000917	-2.845	17072	17391	347867
Mbuti.DG	Eskimo_Chaplin.DG	WLR_BA_o	DST_total	-0.001314	-2.826	34549	35499	723065
Mbuti.DG	Eskimo_Chaplin.DG	Ulchi.DG	DST_total	-0.001019	-2.768	51745	52803	1038188
Mbuti.DG	Eskimo_Chaplin.DG	Kolyma_M	DST_total	-0.001402	-2.68	53991	55443	1036153
Mbuti.DG	YR_LBIA	She.DG	DST_total	-0.000729	-2.674	52686	53438	1032761
Mbuti.DG	Yumin	Mongolia_N_North	DST_total	-0.000884	-2.625	40855	41578	817423
Mbuti.DG	AR_EN	Mongolia_N_East	DST_total	-0.00113	-2.618	15665	16024	317132
Mbuti.DG	YR_MN	Korean.DG	DST_total	-0.000724	-2.573	52275	53023	1033602
Mbuti.DG	Mongolia_N_North	AR_EN	DST_total	-0.000897	-2.509	16526	16828	337062
Mbuti.DG	YR_LN	Korean.DG	DST_total	-0.000632	-2.461	52665	53321	1038635
Mbuti.DG	DGD_IA	WLR_BA_o	DST_total	-0.001416	-2.453	17399	17911	361363
Mbuti.DG	Miaozigou_MN	Shimao_LN	DST_total	-0.001023	-2.411	15799	16119	313116
Mbuti.DG	HMMH_MN	Mongolia_N_East	DST_total	-0.000969	-2.331	27680	28224	560881
Mbuti.DG	YR_LN	Han.DG	DST_total	-0.000475	-2.198	54544	55048	1061516
Mbuti.DG	Baikal_EN	WLR_BA_o	DST_total	-0.000726	-2.195	35633	36169	737883
Mbuti.DG	YR_LBIA	WLR_LN	DST_total	-0.000617	-2.188	44533	45077	882221
Mbuti.DG	YR_LBIA	Upper_YR_LN	DST_total	-0.000516	-2.186	53396	53937	1049893
Mbuti.DG	JPT.SG	Korean.DG	DST_total	-0.000498	-2.132	53013	53531	1039320
Mbuti.DG	YR_LBIA	WLR_BA	DST_total	-0.000643	-2.13	28826	29198	578396
Mbuti.DG	YR_LN	She.DG	DST_total	-0.000542	-2.051	53211	53774	1038495
Mbuti.DG	Mongolia_N_North	WLR_BA_o	DST_total	-0.000712	-2.008	34233	34738	708983
Mbuti.DG	Mongolia_N_East	Mongolia_N_North	DST_total	-0.000548	-1.995	46395	46897	916960
Mbuti.DG	YR_LBIA	Shandong_EN	DST_total	-0.000499	-1.993	47705	48180	950136
Mbuti.DG	Mongolia_N_East	WLR_BA_o	DST_total	-0.00081	-1.909	32182	32718	663087
Mbuti.DG	AR_EN	WLR_BA_o	DST_total	-0.00104	-1.893	11936	12197	250810
Mbuti.DG	YR_LBIA	Tujia.DG	DST_total	-0.000508	-1.866	52686	53210	1032830
Mbuti.DG	YR_MN	Shandong_EN	DST_total	-0.000498	-1.814	47789	48261	950055
Mbuti.DG	UstBelaya_EBA	Koryak.SG	DST_total	-0.000583	-1.801	51853	52447	1018521
Mbuti.DG	YR_LBIA	Chuanyun	DST_total	-0.000713	-1.797	15186	15403	303800
Mbuti.DG	Eskimo_Chaplin.DG	Oroqen.DG	DST_total	-0.000625	-1.791	52051	52699	1038182
Mbuti.DG	Korean.DG	Han.DG	DST_total	-0.000439	-1.777	53298	53755	1039319
Mbuti.DG	AR_Xianbei_IA	WLR_BA_o	DST_total	-0.001084	-1.768	11448	11706	238268
Mbuti.DG	Yumin	HMMH_MN	DST_total	-0.000897	-1.718	24324	24769	496154
Mbuti.DG	Korean.DG	Miaozigou_MN	DST_total	-0.000641	-1.711	15474	15672	309566
Mbuti.DG	YR_MN	Han.DG	DST_total	-0.000404	-1.672	54218	54644	1056283
Mbuti.DG	YR_LBIA	Miao.DG	DST_total	-0.000414	-1.656	52862	53290	1032896
Mbuti.DG	WLR_LN	Shandong_EN	DST_total	-0.000484	-1.622	40883	41278	815533
Mbuti.DG	UstBelaya_EBA	WLR_BA_o	DST_total	-0.000613	-1.601	34069	34503	708641
Mbuti.DG	Mongolia_N_North	HMMH_MN	DST_total	-0.000528	-1.543	29928	30246	603005
Mbuti.DG	Korean.DG	She.DG	DST_total	-0.000444	-1.517	53281	53743	1039098
Mbuti.DG	Yumin	WLR_BA_o	DST_total	-0.000742	-1.503	28397	28837	592992
Mbuti.DG	YR_MN	She.DG	DST_total	-0.00043	-1.491	52921	53365	1033459
Mbuti.DG	UstBelaya_EBA	Mongolia_N_East	DST_total	-0.000425	-1.459	44707	45088	895950
Mbuti.DG	YR_LBIA	WLR_MN	DST_total	-0.000431	-1.442	52862	53314	1048401
Mbuti.DG	WLR_LN	Shimao_LN	DST_total	-0.000431	-1.38	44516	44894	878422
Mbuti.DG	Mongolia_N_East	HMMH_MN	DST_total	-0.000609	-1.373	27883	28224	560881
Mbuti.DG	Japanese.DG	Korean.DG	DST_total	-0.000368	-1.348	52785	53167	1039282
Mbuti.DG	HMMH_MN	WLR_BA_o	DST_total	-0.000558	-1.088	21395	21644	447328
Mbuti.DG	Eskimo_Chaplin.DG	AR_Xianbei_IA	DST_total	-0.000468	-1.077	16038	16191	326514
Mbuti.DG	YR_LBIA	Ami.DG	DST_total	-0.00028	-1.023	53190	53479	1032864
Mbuti.DG	HMMH_MN	AR_LN	DST_total	-0.000895	-0.98	3064	3120	62576
Mbuti.DG	YR_LN	Shandong_EN	DST_total	-0.000227	-0.956	48127	48343	953704
Mbuti.DG	WLR_LN	Korean.DG	DST_total	-0.000291	-0.945	43819	44072	867965
Mbuti.DG	AR_IA	WLR_BA_o	DST_total	-0.000916	-0.794	1932	1969	40467
Mbuti.DG	Eskimo_Chaplin.DG	AR_IA	DST_total	-0.000723	-0.774	2741	2781	54897
Mbuti.DG	Ulchi.DG	Oroqen.DG	DST_total	-0.00023	-0.767	52609	52848	1039148
Mbuti.DG	YR_LN	Miao.DG	DST_total	-0.000172	-0.693	53444	53623	1038626
Mbuti.DG	Yumin	AR_EN	DST_total	-0.000359	-0.689	14131	14235	288681
Mbuti.DG	Japanese.DG	Han.DG	DST_total	-0.000155	-0.677	53429	53590	1039360
Mbuti.DG	Japanese.DG	Miaozigou_MN	DST_total	-0.00024	-0.666	15546	15621	309577
Mbuti.DG	WLR_MN	Miaozigou_MN	DST_total	-0.000283	-0.616	15844	15933	313926
Mbuti.DG	Mongola.DG	WLR_BA_o	DST_total	-0.000217	-0.596	34953	35111	723741
Mbuti.DG	AR_EN	AR_Xianbei_IA	DST_total	-0.00039	-0.546	5590	5635	114815
Mbuti.DG	UstBelaya_EBA	Oroqen.DG	DST_total	-0.000148	-0.527	49986	50133	996721
Mbuti.DG	UstBelaya_EBA	HMMH_MN	DST_total	-0.000198	-0.524	30271	30392	611054
Mbuti.DG	Mongolia_N_East	AR_LN	DST_total	-0.000337	-0.503	4552	4583	91515
Mbuti.DG	YR_MN	Miao.DG	DST_total	-0.000139	-0.503	53131	53275	1033591
Mbuti.DG	Mongola.DG	Miaozigou_MN	DST_total	-0.000194	-0.501	15539	15599	309569
Mbuti.DG	Korean.DG	Shimao_LN	DST_total	-0.000143	-0.463	52454	52601	1028310
Mbuti.DG	JPT.SG	She.DG	DST_total	-0.000106	-0.459	53714	53824	1039179
Mbuti.DG	AR_IA	Miaozigou_MN	DST_total	-0.000737	-0.441	891	904	17926
Mbuti.DG	Eskimo_Chaplin.DG	AR_EN	DST_total	-0.000192	-0.434	16763	16828	341014
Mbuti.DG	UstBelaya_EBA	Saqqaq.SG	DST_total	-0.000171	-0.433	49058	49222	962198
Mbuti.DG	AR_IA	AR_LN	DST_total	-0.001144	-0.406	251	258	5465
Mbuti.DG	JPT.SG	Han.DG	DST_total	-7e-05	-0.363	55044	55118	1062379
Mbuti.DG	Baikal_EN	AR_LN	DST_total	-0.000145	-0.295	5090	5105	102581
Mbuti.DG	DGD_IA	AR_Xianbei_IA	DST_total	-0.000154	-0.255	8091	8116	164237
Mbuti.DG	YR_LBIA	Japanese.DG	DST_total	-6e-05	-0.255	52645	52707	1032937
Mbuti.DG	DGD_IA	AR_LN	DST_total	-0.000244	-0.233	2530	2543	50458
Mbuti.DG	WLR_BA	Miaozigou_MN	DST_total	-0.000114	-0.2	9225	9246	183724
Mbuti.DG	Baikal_EN	AR_Xianbei_IA	DST_total	-6.5e-05	-0.197	16521	16543	333111
Mbuti.DG	Korean.DG	Miao.DG	DST_total	-5.5e-05	-0.194	53457	53514	1039229
Mbuti.DG	JPT.SG	Chuanyun	DST_total	-6.6e-05	-0.19	15433	15453	304511
Mbuti.DG	WLR_MN	Shandong_EN	DST_total	-5.9e-05	-0.189	48124	48180	948536
Mbuti.DG	Korean.DG	Japanese.DG	DST_total	-4.4e-05	-0.168	53122	53167	1039282
Mbuti.DG	UstBelaya_EBA	Eskimo_Chaplin.DG	DST_total	-5.8e-05	-0.16	51290	51348	995796
Mbuti.DG	YR_MN	Naxi.DG	DST_total	-4.1e-05	-0.156	53277	53319	1033655
Mbuti.DG	WLR_LN	Han.DG	DST_total	-4.1e-05	-0.155	45373	45409	885822
Mbuti.DG	Baikal_EN	HMMH_MN	DST_total	-4.8e-05	-0.147	31695	31725	634566
Mbuti.DG	HMMH_MN	Mongolia_N_North	DST_total	-2.6e-05	-0.078	30231	30246	603005
Mbuti.DG	WLR_LN	She.DG	DST_total	-1.5e-05	-0.049	44372	44385	867853
Mbuti.DG	Mongolia_N_East	AR_Xianbei_IA	DST_total	-1.8e-05	-0.041	14960	14966	301008
Mbuti.DG	YR_LBIA	Naxi.DG	DST_total	4e-06	0.016	53192	53188	1032956
Mbuti.DG	UstBelaya_EBA	Ulchi.DG	DST_total	1.9e-05	0.064	49958	49939	996711
Mbuti.DG	HMMH_MN	AR_EN	DST_total	5.8e-05	0.103	10552	10540	215499
Mbuti.DG	Japanese.DG	She.DG	DST_total	2.9e-05	0.104	53492	53462	1039140
Mbuti.DG	AR_EN	AR_LN	DST_total	0.000149	0.117	1721	1716	34648
Mbuti.DG	HMMH_MN	AR_Xianbei_IA	DST_total	7.1e-05	0.122	9931	9916	202173
Mbuti.DG	Eskimo_Chaplin.DG	AR_LN	DST_total	9.3e-05	0.143	4928	4918	100387
Mbuti.DG	AR_Xianbei_IA	AR_LN	DST_total	0.000171	0.143	1616	1610	32967
Mbuti.DG	Miaozigou_MN	Shandong_EN	DST_total	6.6e-05	0.151	14665	14646	291134
Mbuti.DG	JPT.SG	Miaozigou_MN	DST_total	5e-05	0.154	15983	15967	315500
Mbuti.DG	Yumin	AR_LN	DST_total	0.000163	0.2	4007	3994	81349
Mbuti.DG	Miaozigou_MN	Korean.DG	DST_total	8e-05	0.204	15697	15672	309566
Mbuti.DG	UstBelaya_EBA	Itelman.DG	DST_total	7.9e-05	0.213	51329	51251	995423
Mbuti.DG	JPT.SG	DevilsCave_N	DST_total	6.1e-05	0.267	53674	53609	1061291
Mbuti.DG	WLR_BA	Korean.DG	DST_total	9.3e-05	0.276	28836	28783	569375
Mbuti.DG	YR_MN	Japanese.DG	DST_total	7.7e-05	0.297	52834	52755	1033637
Mbuti.DG	JPT.SG	Tujia.DG	DST_total	7.2e-05	0.309	53711	53636	1039250
Mbuti.DG	Eskimo_Chaplin.DG	Boisman_MN	DST_total	9.2e-05	0.337	47542	47454	957578
Mbuti.DG	WLR_LN	Miao.DG	DST_total	0.000126	0.396	44469	44360	867967
Mbuti.DG	JPT.SG	WLR_BA_o	DST_total	0.000124	0.401	36060	35969	737895
Mbuti.DG	Mongolia_N_East	ARpost9K	DST_total	0.000111	0.409	37434	37352	749000
Mbuti.DG	Yumin	ARpost9K	DST_total	0.000141	0.437	35001	34901	705291
Mbuti.DG	YR_LBIA	WLR_BA_o	DST_total	0.000164	0.459	35657	35536	734533
Mbuti.DG	WLR_MN	HMMH_MN	DST_total	0.00021	0.473	31643	31511	631042
Mbuti.DG	Eskimo_Chaplin.DG	DevilsCave_N	DST_total	0.000205	0.56	52063	51850	1037299
Mbuti.DG	Eskimo_Chaplin.DG	Baikal_EN	DST_total	0.000163	0.565	52950	52781	1038277
Mbuti.DG	Yumin	Miaozigou_MN	DST_total	0.000307	0.571	12973	12894	258253
Mbuti.DG	Eskimo_Chaplin.DG	USR	DST_total	0.000309	0.572	55814	55493	1037545
Mbuti.DG	JPT.SG	Upper_YR_IA	DST_total	0.000133	0.623	52790	52654	1023545
Mbuti.DG	YR_MN	HMMH_MN	DST_total	0.000244	0.666	31486	31332	631907
Mbuti.DG	YR_LBIA	Xiaogao	DST_total	0.000239	0.698	44415	44207	870156
Mbuti.DG	AR_EN	AR_IA	DST_total	0.001084	0.7	991	969	19999
Mbuti.DG	Korean.DG	Naxi.DG	DST_total	0.000205	0.738	53752	53539	1039292
Mbuti.DG	Mongolia_N_North	AR_Xianbei_IA	DST_total	0.000269	0.743	15945	15859	321028
Mbuti.DG	Miaozigou_MN	HMMH_MN	DST_total	0.000435	0.752	9712	9627	195819
Mbuti.DG	AR_IA	AR_EN	DST_total	0.001173	0.761	992	969	19999
Mbuti.DG	AR_LN	HMMH_MN	DST_total	0.000726	0.765	3165	3120	62576
Mbuti.DG	Mongola.DG	CHB.SG	DST_total	0.000151	0.776	53303	53147	1039331
Mbuti.DG	Japanese.DG	DevilsCave_N	DST_total	0.00022	0.784	52213	51985	1038359
Mbuti.DG	JPT.SG	WLR_MN	DST_total	0.000201	0.805	53943	53730	1055028
Mbuti.DG	UstBelaya_EBA	Yumin	DST_total	0.000323	0.815	39756	39500	791325
Mbuti.DG	Miaozigou_MN	DevilsCave_N	DST_total	0.000364	0.833	15777	15662	315232
Mbuti.DG	YR_LN	Naxi.DG	DST_total	0.000208	0.852	53745	53528	1038694
Mbuti.DG	Mongolia_N_North	Boisman_MN	DST_total	0.000186	0.864	47826	47649	957051
Mbuti.DG	Mongola.DG	WLR_MN	DST_total	0.000279	0.864	52422	52134	1032395
Mbuti.DG	AR_Xianbei_IA	AR_EN	DST_total	0.000581	0.876	5701	5635	114815
Mbuti.DG	Yumin	AR13-10K	DST_total	0.000362	0.89	24421	24245	486456
Mbuti.DG	YR_LN	Japanese.DG	DST_total	0.000207	0.906	53234	53019	1038675
Mbuti.DG	JPT.SG	Miao.DG	DST_total	0.000202	0.914	53914	53704	1039311
Mbuti.DG	Korean.DG	Shandong_EN	DST_total	0.000262	0.938	47365	47120	936182
Mbuti.DG	AR_IA	HMMH_MN	DST_total	0.001237	0.949	1710	1668	34148
Mbuti.DG	Mongolia_N_East	Boisman_MN	DST_total	0.000234	0.957	45138	44927	900729
Mbuti.DG	JPT.SG	Boisman_MN	DST_total	0.00017	0.962	49007	48841	977703
Mbuti.DG	JPT.SG	WLR_BA	DST_total	0.000245	0.966	29424	29282	580518
Mbuti.DG	AR_IA	LetuchayaMysh_7000BP	DST_total	0.001912	0.975	626	601	13178
Mbuti.DG	Oroqen.DG	Even.DG	DST_total	0.000283	0.978	53557	53262	1039250
Mbuti.DG	Mongola.DG	Korean.DG	DST_total	0.00029	0.989	53007	52706	1039255
Mbuti.DG	JPT.SG	Ami.DG	DST_total	0.000234	1.002	54194	53951	1039282
Mbuti.DG	AR_EN	HMMH_MN	DST_total	0.000589	1.013	10667	10540	215499
Mbuti.DG	Yumin	AR_Xianbei_IA	DST_total	0.000535	1.017	13438	13293	271166
Mbuti.DG	Hezhen.DG	Oroqen.DG	DST_total	0.000312	1.036	52604	52280	1039210
Mbuti.DG	Eskimo_Chaplin.DG	Mongolia_N_East	DST_total	0.000397	1.046	46071	45707	916138
Mbuti.DG	AR_EN	Boisman_MN	DST_total	0.000375	1.05	16358	16235	329731
Mbuti.DG	JPT.SG	AR_LN	DST_total	0.000494	1.054	5141	5091	102582
Mbuti.DG	Eskimo_Chaplin.DG	Mongolia_N_North	DST_total	0.000355	1.076	49846	49496	985260
Mbuti.DG	DGD_IA	Boisman_MN	DST_total	0.000376	1.09	23797	23619	474607
Mbuti.DG	HMMH_MN	AR_IA	DST_total	0.001422	1.136	1716	1668	34148
Mbuti.DG	UstBelaya_EBA	Eskimo_Naukan.DG	DST_total	0.000359	1.139	51786	51428	996755
Mbuti.DG	Yumin	WLR_MN	DST_total	0.000497	1.165	41624	41216	822454
Mbuti.DG	Japanese.DG	Miao.DG	DST_total	0.000303	1.168	53661	53346	1039268
Mbuti.DG	YR_LBIA	DevilsCave_N	DST_total	0.000312	1.178	52983	52654	1054439
Mbuti.DG	Miaozigou_MN	Han.DG	DST_total	0.000423	1.186	16262	16129	315500
Mbuti.DG	UstBelaya_EBA	Eskimo_Sireniki.DG	DST_total	0.000385	1.217	51720	51337	996767
Mbuti.DG	Mongolia_N_North	AR_LN	DST_total	0.000713	1.235	4897	4827	97956
Mbuti.DG	Eskimo_Chaplin.DG	Even.DG	DST_total	0.000434	1.291	53308	52858	1038281
Mbuti.DG	AR_LN	LetuchayaMysh_7000BP	DST_total	0.001892	1.291	1094	1051	22776
Mbuti.DG	YR_LBIA	Atayal.DG	DST_total	0.000439	1.297	53523	53070	1031147
Mbuti.DG	Mongola.DG	AR_LN	DST_total	0.000701	1.308	5003	4932	100487
Mbuti.DG	AR_Xianbei_IA	AR_IA	DST_total	0.002076	1.31	933	894	18803
Mbuti.DG	Miaozigou_MN	Naxi.DG	DST_total	0.000488	1.312	15976	15825	309582
Mbuti.DG	Mongola.DG	Upper_YR_IA	DST_total	0.00037	1.321	51330	50959	1002478
Mbuti.DG	WLR_MN	Mongolia_N_East	DST_total	0.000447	1.323	47031	46615	929649
Mbuti.DG	Miaozigou_MN	Miao.DG	DST_total	0.000516	1.334	15906	15747	309564
Mbuti.DG	Mongola.DG	She.DG	DST_total	0.000391	1.348	53549	53142	1039118
Mbuti.DG	Mongola.DG	WLR_BA	DST_total	0.000426	1.353	28669	28426	569375
Mbuti.DG	WLR_LN	Japanese.DG	DST_total	0.000386	1.354	44258	43923	867996
Mbuti.DG	Mongolia_N_North	ARpost9K	DST_total	0.000321	1.365	38889	38639	779730
Mbuti.DG	AR_IA	Saqqaq.SG	DST_total	0.001592	1.456	2739	2653	53954
Mbuti.DG	Eskimo_Chaplin.DG	HMMH_MN	DST_total	0.0007	1.461	30972	30538	620279
Mbuti.DG	WLR_BA	HMMH_MN	DST_total	0.000714	1.489	17809	17554	357255
Mbuti.DG	Mongola.DG	AR_Xianbei_IA	DST_total	0.000552	1.496	16208	16027	326826
Mbuti.DG	Miaozigou_MN	Mongolia_N_East	DST_total	0.000652	1.515	14360	14174	285786
Mbuti.DG	Eskimo_Chaplin.DG	Hezhen.DG	DST_total	0.000563	1.567	52701	52117	1038247
Mbuti.DG	WLR_MN	Shimao_LN	DST_total	0.00057	1.591	53786	53191	1043726
Mbuti.DG	Yumin	AR_IA	DST_total	0.001837	1.592	2373	2287	47081
Mbuti.DG	YR_LBIA	GaoHuaHua	DST_total	0.000437	1.619	47782	47380	919686
Mbuti.DG	Japanese.DG	Shimao_LN	DST_total	0.000447	1.627	52705	52245	1028345
Mbuti.DG	Mongola.DG	Chuanyun	DST_total	0.000692	1.628	15156	14948	299778
Mbuti.DG	YR_LBIA	AR_EN	DST_total	0.000578	1.634	17166	16966	346616
Mbuti.DG	Mongola.DG	Han.DG	DST_total	0.000396	1.639	53586	53175	1039329
Mbuti.DG	AR_IA	AR14K	DST_total	0.001936	1.642	1677	1613	33093
Mbuti.DG	Mongola.DG	Tujia.DG	DST_total	0.000485	1.649	53493	52989	1039186
Mbuti.DG	Mongola.DG	HMMH_MN	DST_total	0.000618	1.668	31036	30653	620851
Mbuti.DG	AR_EN	Miaozigou_MN	DST_total	0.001201	1.676	5584	5451	110270
Mbuti.DG	Eskimo_Chaplin.DG	UKY	DST_total	0.000876	1.692	30387	29869	591719
Mbuti.DG	Miaozigou_MN	Japanese.DG	DST_total	0.000622	1.695	15813	15621	309577
Mbuti.DG	AR_IA	WLR_BA	DST_total	0.002155	1.731	1651	1581	32551
Mbuti.DG	YR_LBIA	Boisman_MN	DST_total	0.000365	1.733	48490	48135	973620
Mbuti.DG	Eskimo_Chaplin.DG	AR13-10K	DST_total	0.000649	1.734	25315	24989	503866
Mbuti.DG	Mongola.DG	CHS.SG	DST_total	0.000351	1.767	53520	53156	1039331
Mbuti.DG	AR_IA	AR_Xianbei_IA	DST_total	0.002814	1.768	947	894	18803
Mbuti.DG	AR_IA	Daur.DG	DST_total	0.001569	1.769	2792	2706	54817
Mbuti.DG	Mongola.DG	Shimao_LN	DST_total	0.000537	1.818	52630	52077	1028313
Mbuti.DG	Eskimo_Chaplin.DG	LetuchayaMysh_7000BP	DST_total	0.001001	1.82	10506	10286	220733
Mbuti.DG	HMMH_MN	WLR_MN	DST_total	0.000791	1.832	32010	31511	631042
Mbuti.DG	AR_IA	Eskimo_Chaplin.DG	DST_total	0.00165	1.832	2871	2781	54897
Mbuti.DG	Baikal_EN	AR_IA	DST_total	0.001288	1.833	2833	2761	55944
Mbuti.DG	JPT.SG	Shimao_LN	DST_total	0.000433	1.848	54240	53784	1050762
Mbuti.DG	Miaozigou_MN	Tujia.DG	DST_total	0.000743	1.854	15930	15700	309540
Mbuti.DG	AR_EN	DevilsCave_N	DST_total	0.000799	1.86	17420	17142	347591
Mbuti.DG	AR_IA	Upper_YR_LN	DST_total	0.001508	1.876	2852	2768	55732
Mbuti.DG	AR_IA	Ulchi.DG	DST_total	0.001343	1.88	2752	2678	54951
Mbuti.DG	AR_IA	Even.DG	DST_total	0.001377	1.941	2806	2730	54956
Mbuti.DG	Mongola.DG	AR_EN	DST_total	0.000708	1.952	16917	16676	341337
Mbuti.DG	JPT.SG	Shandong_EN	DST_total	0.00042	1.968	48691	48290	953878
Mbuti.DG	Miaozigou_MN	She.DG	DST_total	0.00079	1.997	15933	15688	309524
Mbuti.DG	Yumin	AR14K	DST_total	0.000899	2.008	26157	25691	518616
Mbuti.DG	Yumin	LetuchayaMysh_7000BP	DST_total	0.001237	2.014	9532	9285	200085
Mbuti.DG	AR_LN	Miaozigou_MN	DST_total	0.002517	2.026	1633	1554	31568
Mbuti.DG	UstBelaya_EBA	Yakut.DG	DST_total	0.000621	2.044	51309	50689	996726
Mbuti.DG	Mongolia_N_North	AR_IA	DST_total	0.001569	2.044	2749	2664	54451
Mbuti.DG	Baikal_EN	Ulchi.DG	DST_total	0.000538	2.045	52645	52085	1039242
Mbuti.DG	Mongola.DG	DevilsCave_N	DST_total	0.000596	2.054	52294	51676	1038329
Mbuti.DG	WLR_BA	DevilsCave_N	DST_total	0.000681	2.058	29095	28700	580056
Mbuti.DG	AR_IA	Mongolia_N_North	DST_total	0.001458	2.06	2743	2664	54451
Mbuti.DG	WLR_LN	Naxi.DG	DST_total	0.000601	2.063	44723	44202	868001
Mbuti.DG	Mongola.DG	Oroqen.DG	DST_total	0.000593	2.07	52592	51975	1039200
Mbuti.DG	AR_IA	AR13-10K	DST_total	0.002348	2.078	1575	1502	31105
Mbuti.DG	YR_LBIA	AR_IA	DST_total	0.001585	2.083	2800	2712	55781
Mbuti.DG	YR_LBIA	AR_LN	DST_total	0.001173	2.085	5120	5001	102078
Mbuti.DG	AR_EN	Mongolia_N_North	DST_total	0.000726	2.097	17073	16828	337062
Mbuti.DG	AR_EN	ARpost9K	DST_total	0.000887	2.099	13798	13553	276482
Mbuti.DG	YR_LBIA	Mongola.DG	DST_total	0.000584	2.105	53042	52439	1032906
Mbuti.DG	WLR_MN	Korean.DG	DST_total	0.000687	2.11	53041	52332	1032384
Mbuti.DG	AR_IA	Boisman_MN	DST_total	0.00147	2.116	2636	2558	53377
Mbuti.DG	Yumin	Xiaogao	DST_total	0.001041	2.129	38725	37940	754291
Mbuti.DG	AR_IA	Oroqen.DG	DST_total	0.001617	2.131	2785	2696	54951
Mbuti.DG	Japanese.DG	Hezhen.DG	DST_total	0.000569	2.135	52852	52261	1039292
Mbuti.DG	DGD_IA	DevilsCave_N	DST_total	0.000872	2.137	25963	25518	510646
Mbuti.DG	Baikal_EN	Oroqen.DG	DST_total	0.000506	2.145	52742	52216	1039251
Mbuti.DG	AR_Xianbei_IA	HMMH_MN	DST_total	0.001261	2.156	10171	9916	202173
Mbuti.DG	YR_LBIA	Daur.DG	DST_total	0.000677	2.157	52686	51988	1030461
Mbuti.DG	YR_LBIA	Kinh.DG	DST_total	0.00058	2.202	53872	53272	1032818
Mbuti.DG	DGD_IA	Mongolia_N_East	DST_total	0.001003	2.247	23113	22658	454374
Mbuti.DG	DGD_IA	HMMH_MN	DST_total	0.001305	2.247	15741	15335	311076
Mbuti.DG	YR_MN	Mongola.DG	DST_total	0.000659	2.252	53198	52517	1033609
Mbuti.DG	Japanese.DG	Shandong_EN	DST_total	0.000573	2.264	47522	46985	936214
Mbuti.DG	DevilsCave_N	Ulchi.DG	DST_total	0.000744	2.283	52957	52184	1038263
Mbuti.DG	JPT.SG	Upper_YR_LN	DST_total	0.000475	2.284	54632	54131	1056626
Mbuti.DG	Eskimo_Chaplin.DG	Baikal_EBA	DST_total	0.000749	2.286	52785	52024	1016962
Mbuti.DG	Miaozigou_MN	Mongola.DG	DST_total	0.000959	2.29	15896	15599	309569
Mbuti.DG	Mongolia_N_North	AR13-10K	DST_total	0.000636	2.307	25745	25420	510720
Mbuti.DG	Yumin	Boisman_MN	DST_total	0.000716	2.32	40203	39625	806987
Mbuti.DG	AR_IA	ARpost9K	DST_total	0.002008	2.355	2280	2189	45239
Mbuti.DG	JPT.SG	Atayal.DG	DST_total	0.000695	2.363	54372	53650	1037549
Mbuti.DG	YR_LBIA	HMMH_MN	DST_total	0.000785	2.364	31585	31089	631443
Mbuti.DG	Mongolia_N_East	AR13-10K	DST_total	0.000743	2.368	25290	24919	499566
Mbuti.DG	UstBelaya_EBA	WLR_MN	DST_total	0.000748	2.368	51454	50697	1011750
Mbuti.DG	Yumin	WLR_BA	DST_total	0.001056	2.375	24142	23638	477419
Mbuti.DG	AR_EN	AR13-10K	DST_total	0.001187	2.378	9372	9149	187408
Mbuti.DG	HMMH_MN	LetuchayaMysh_7000BP	DST_total	0.001618	2.384	6662	6435	139895
Mbuti.DG	Mongola.DG	Hezhen.DG	DST_total	0.000682	2.389	52817	52108	1039262
Mbuti.DG	AR_IA	AR19K	DST_total	0.002817	2.396	2108	1995	40135
Mbuti.DG	YR_LBIA	BaBanQinCen	DST_total	0.000642	2.422	36431	35978	704799
Mbuti.DG	YR_LN	DevilsCave_N	DST_total	0.000621	2.441	53609	52950	1060448
Mbuti.DG	JPT.SG	Xiaogao	DST_total	0.000713	2.477	45115	44492	873115
Mbuti.DG	AR_IA	Mongolia_N_East	DST_total	0.002092	2.484	2589	2481	51417
Mbuti.DG	Ulchi.DG	Hezhen.DG	DST_total	0.00077	2.491	53224	52424	1039201
Mbuti.DG	WLR_BA	Shimao_LN	DST_total	0.000895	2.492	29490	28974	575975
Mbuti.DG	HMMH_MN	Boisman_MN	DST_total	0.000802	2.5	29146	28676	585823
Mbuti.DG	Oroqen.DG	Koryak.SG	DST_total	0.000816	2.514	53835	52986	1039167
Mbuti.DG	AR_Xianbei_IA	Mongolia_N_East	DST_total	0.001129	2.514	15305	14966	301008
Mbuti.DG	UstBelaya_EBA	Even.DG	DST_total	0.000677	2.518	51078	50403	996822
Mbuti.DG	Korean.DG	Hezhen.DG	DST_total	0.000725	2.533	52913	52159	1039252
Mbuti.DG	AR_IA	Chuanyun	DST_total	0.004258	2.544	937	861	17810
Mbuti.DG	YR_LBIA	Hezhen.DG	DST_total	0.000642	2.555	52404	51740	1032912
Mbuti.DG	AR_Xianbei_IA	Oroqen.DG	DST_total	0.001019	2.588	16677	16344	326810
Mbuti.DG	Eskimo_Chaplin.DG	MiddleDorset.SG	DST_total	0.002105	2.59	4312	4146	78977
Mbuti.DG	YR_MN	Mongolia_N_East	DST_total	0.000758	2.594	47075	46369	931049
Mbuti.DG	AR_IA	WLR_LN	DST_total	0.00249	2.597	2512	2390	48802
Mbuti.DG	Mongola.DG	Japanese.DG	DST_total	0.000663	2.6	53341	52651	1039290
Mbuti.DG	AR_IA	DevilsCave_N	DST_total	0.002196	2.607	2827	2704	55899
Mbuti.DG	WLR_LN	HMMH_MN	DST_total	0.001104	2.623	27053	26457	540523
Mbuti.DG	AR_Xianbei_IA	Ulchi.DG	DST_total	0.00109	2.625	16631	16274	326810
Mbuti.DG	AR_IA	Baikal_EN	DST_total	0.001745	2.636	2859	2761	55944
Mbuti.DG	JPT.SG	Ulchi.DG	DST_total	0.000633	2.64	52902	52244	1039263
Mbuti.DG	AR_IA	Upper_YR_IA	DST_total	0.002265	2.646	2790	2667	54483
Mbuti.DG	Yumin	Upper_YR_LN	DST_total	0.000918	2.657	42076	41321	822727
Mbuti.DG	Eskimo_Chaplin.DG	ARpost9K	DST_total	0.00082	2.669	38576	37941	774039
Mbuti.DG	Korean.DG	DevilsCave_N	DST_total	0.000782	2.671	52456	51645	1038318
Mbuti.DG	UstBelaya_EBA	Miaozigou_MN	DST_total	0.00114	2.675	15355	15009	303528
Mbuti.DG	JPT.SG	HMMH_MN	DST_total	0.000803	2.694	32006	31497	634571
Mbuti.DG	WLR_BA	Shandong_EN	DST_total	0.000872	2.697	27318	26849	537850
Mbuti.DG	AR_IA	Koryak.SG	DST_total	0.002298	2.697	2883	2754	55942
Mbuti.DG	YR_MN	Daur.DG	DST_total	0.000954	2.735	52927	51943	1031156
Mbuti.DG	Miaozigou_MN	Hezhen.DG	DST_total	0.001102	2.749	15706	15365	309564
Mbuti.DG	AR_LN	Mongolia_N_East	DST_total	0.001937	2.764	4760	4583	91515
Mbuti.DG	AR_Xianbei_IA	LetuchayaMysh_7000BP	DST_total	0.002267	2.771	3661	3490	75396
Mbuti.DG	WLR_LN	DevilsCave_N	DST_total	0.000859	2.783	44542	43782	885085
Mbuti.DG	Mongola.DG	Boisman_MN	DST_total	0.000647	2.804	47841	47221	958511
Mbuti.DG	Miaozigou_MN	GaoHuaHua	DST_total	0.001216	2.824	14658	14317	280918
Mbuti.DG	AR_IA	Shimao_LN	DST_total	0.002494	2.827	2872	2733	55522
Mbuti.DG	AR_IA	MiddleDorset.SG	DST_total	0.010006	2.838	288	240	4799
Mbuti.DG	YR_LBIA	LaCen	DST_total	0.000907	2.847	40737	40027	783631
Mbuti.DG	JPT.SG	WLR_LN	DST_total	0.000661	2.848	45617	45031	885830
Mbuti.DG	Miaozigou_MN	Oroqen.DG	DST_total	0.00113	2.849	15640	15290	309563
Mbuti.DG	Japanese.DG	HMMH_MN	DST_total	0.001008	2.864	31178	30552	620873
Mbuti.DG	YR_LN	HMMH_MN	DST_total	0.000946	2.866	31874	31274	634178
Mbuti.DG	Korean.DG	Kinh.DG	DST_total	0.000857	2.868	54491	53600	1039164
Mbuti.DG	AR_Xianbei_IA	Boisman_MN	DST_total	0.001021	2.883	15779	15459	313429
Mbuti.DG	YR_MN	DevilsCave_N	DST_total	0.000781	2.889	53366	52542	1055271
Mbuti.DG	Mongola.DG	Ulchi.DG	DST_total	0.000847	2.889	52619	51739	1039197
Mbuti.DG	HMMH_MN	WLR_BA	DST_total	0.001349	2.891	18035	17554	357255
Mbuti.DG	YR_LN	GaoHuaHua	DST_total	0.000745	2.894	48275	47587	923720
Mbuti.DG	UstBelaya_EBA	DevilsCave_N	DST_total	0.000866	2.894	51363	50482	1017684
Mbuti.DG	Ulchi.DG	Koryak.SG	DST_total	0.000983	2.918	53945	52923	1039161
Mbuti.DG	Hezhen.DG	HMMH_MN	DST_total	0.001129	2.922	31232	30531	620856
Mbuti.DG	HMMH_MN	Ulchi.DG	DST_total	0.001162	2.937	31359	30637	620813
Mbuti.DG	Oroqen.DG	Hezhen.DG	DST_total	0.00085	2.948	53163	52280	1039210
Mbuti.DG	Baikal_EN	Saqqaq.SG	DST_total	0.000988	2.957	51965	50973	1003698
Mbuti.DG	Japanese.DG	LetuchayaMysh_7000BP	DST_total	0.001258	2.959	10516	10239	220933
Mbuti.DG	Miaozigou_MN	Mongolia_N_North	DST_total	0.001052	2.967	15441	15121	304570
Mbuti.DG	YR_LBIA	AR14K	DST_total	0.00097	3.022	27493	26963	546560
Mbuti.DG	Eskimo_Chaplin.DG	Miaozigou_MN	DST_total	0.001425	3.026	15753	15313	309250
Mbuti.DG	AR_IA	Eskimo_Sireniki.DG	DST_total	0.002452	3.082	2875	2740	54955
Mbuti.DG	DGD_IA	AR13-10K	DST_total	0.001488	3.094	12712	12341	249375
Mbuti.DG	Korean.DG	Mongola.DG	DST_total	0.000946	3.107	53690	52706	1039255
Mbuti.DG	AR_EN	Oroqen.DG	DST_total	0.001131	3.114	17225	16839	341319
Mbuti.DG	YR_LBIA	Dai.DG	DST_total	0.000695	3.13	55140	54406	1055454
Mbuti.DG	Hezhen.DG	Miaozigou_MN	DST_total	0.001241	3.133	15749	15365	309564
Mbuti.DG	YR_MN	Hezhen.DG	DST_total	0.000875	3.137	52633	51729	1033611
Mbuti.DG	YR_LN	Kinh.DG	DST_total	0.00083	3.148	54460	53598	1038553
Mbuti.DG	Mongola.DG	WLR_LN	DST_total	0.000904	3.148	44377	43592	867974
Mbuti.DG	HMMH_MN	Miaozigou_MN	DST_total	0.001818	3.188	9982	9627	195819
Mbuti.DG	JPT.SG	AR_EN	DST_total	0.000959	3.189	17419	17085	347867
Mbuti.DG	Eskimo_Chaplin.DG	WLR_MN	DST_total	0.001276	3.198	52780	51464	1031376
Mbuti.DG	AR_IA	Eskimo_Naukan.DG	DST_total	0.002536	3.209	2884	2745	54952
Mbuti.DG	Mongola.DG	Upper_YR_LN	DST_total	0.000824	3.212	53158	52306	1033843
Mbuti.DG	AR_IA	Hezhen.DG	DST_total	0.002369	3.213	2816	2686	54954
Mbuti.DG	Korean.DG	HMMH_MN	DST_total	0.001169	3.216	31190	30464	620850
Mbuti.DG	JPT.SG	LetuchayaMysh_7000BP	DST_total	0.001185	3.222	10786	10520	224605
Mbuti.DG	JPT.SG	Hezhen.DG	DST_total	0.000705	3.232	53188	52455	1039332
Mbuti.DG	Ulchi.DG	HMMH_MN	DST_total	0.001265	3.233	31423	30637	620813
Mbuti.DG	YR_MN	Oroqen.DG	DST_total	0.000893	3.234	52497	51574	1033547
Mbuti.DG	Mongola.DG	AR_IA	DST_total	0.002406	3.234	2790	2658	54954
Mbuti.DG	JPT.SG	AR_Xianbei_IA	DST_total	0.001002	3.276	16758	16424	333115
Mbuti.DG	Ulchi.DG	LetuchayaMysh_7000BP	DST_total	0.001509	3.288	10614	10280	220916
Mbuti.DG	UstBelaya_EBA	LetuchayaMysh_7000BP	DST_total	0.001621	3.288	10335	9985	216151
Mbuti.DG	AR_IA	UKY	DST_total	0.004332	3.302	1799	1651	34196
Mbuti.DG	Yumin	Shandong_EN	DST_total	0.001162	3.304	40708	39781	798026
Mbuti.DG	WLR_LN	Kinh.DG	DST_total	0.001057	3.305	45226	44308	867898
Mbuti.DG	YR_LN	Mongola.DG	DST_total	0.00088	3.31	53651	52736	1038644
Mbuti.DG	Miaozigou_MN	LetuchayaMysh_7000BP	DST_total	0.002598	3.329	3561	3369	73777
Mbuti.DG	AR_IA	Shandong_EN	DST_total	0.002889	3.331	2693	2542	52429
Mbuti.DG	Mongolia_N_East	AR_IA	DST_total	0.003019	3.339	2637	2481	51417
Mbuti.DG	Japanese.DG	Oroqen.DG	DST_total	0.000919	3.346	52888	51933	1039229
Mbuti.DG	Baikal_EN	Boisman_MN	DST_total	0.000657	3.347	48964	48321	977670
Mbuti.DG	HMMH_MN	ARpost9K	DST_total	0.001192	3.351	23326	22767	469302
Mbuti.DG	Yumin	Baikal_EN	DST_total	0.000998	3.363	42195	41371	826353
Mbuti.DG	Mongola.DG	Miao.DG	DST_total	0.000977	3.364	53897	52882	1039237
Mbuti.DG	WLR_MN	Hezhen.DG	DST_total	0.001096	3.379	52884	51753	1032400
Mbuti.DG	HMMH_MN	DevilsCave_N	DST_total	0.001286	3.38	31945	31130	634078
Mbuti.DG	WLR_MN	She.DG	DST_total	0.001207	3.382	53821	52575	1032246
Mbuti.DG	Eskimo_Chaplin.DG	AR14K	DST_total	0.001363	3.387	27229	26494	538865
Mbuti.DG	WLR_LN	LetuchayaMysh_7000BP	DST_total	0.001765	3.392	9499	9149	198270
Mbuti.DG	AR_IA	WLR_MN	DST_total	0.003063	3.395	2862	2692	55691
Mbuti.DG	AR_IA	Xiaogao	DST_total	0.00363	3.413	2563	2385	48787
Mbuti.DG	WLR_LN	Daur.DG	DST_total	0.001302	3.416	44361	43233	865958
Mbuti.DG	AR_LN	Ulchi.DG	DST_total	0.00196	3.441	5193	4996	100480
Mbuti.DG	Mongolia_N_East	Baikal_EN	DST_total	0.00085	3.442	48258	47464	934725
Mbuti.DG	YR_MN	LetuchayaMysh_7000BP	DST_total	0.001664	3.447	10768	10395	223960
Mbuti.DG	Boisman_MN	Ulchi.DG	DST_total	0.000967	3.454	48868	47941	958447
Mbuti.DG	Baikal_EN	DevilsCave_N	DST_total	0.000843	3.457	53785	52891	1061287
Mbuti.DG	AR_LN	Oroqen.DG	DST_total	0.002107	3.466	5199	4987	100479
Mbuti.DG	YR_MN	Kinh.DG	DST_total	0.000986	3.477	54169	53150	1033518
Mbuti.DG	Baikal_EN	Koryak.SG	DST_total	0.000939	3.479	55058	54061	1062224
Mbuti.DG	YR_MN	Sherpa.DG	DST_total	0.001057	3.485	54036	52943	1033587
Mbuti.DG	WLR_BA	She.DG	DST_total	0.001237	3.485	29406	28702	569285
Mbuti.DG	YR_LBIA	LetuchayaMysh_7000BP	DST_total	0.001487	3.486	10712	10379	224074
Mbuti.DG	YR_LBIA	AR_Xianbei_IA	DST_total	0.001248	3.487	16602	16188	331683
Mbuti.DG	Miaozigou_MN	Sherpa.DG	DST_total	0.001477	3.491	16187	15729	309558
Mbuti.DG	YR_MN	Tibetan.SG	DST_total	0.000742	3.493	54841	54062	1049898
Mbuti.DG	Korean.DG	GaoHuaHua	DST_total	0.001062	3.498	47407	46444	907114
Mbuti.DG	Mongola.DG	Ami.DG	DST_total	0.001044	3.504	54171	53086	1039213
Mbuti.DG	YR_LN	Daur.DG	DST_total	0.001079	3.508	53328	52210	1036176
Mbuti.DG	WLR_BA	Japanese.DG	DST_total	0.001083	3.513	29197	28581	569389
Mbuti.DG	WLR_MN	LetuchayaMysh_7000BP	DST_total	0.001852	3.514	10792	10378	223668
Mbuti.DG	Japanese.DG	Daur.DG	DST_total	0.001183	3.517	53378	52152	1036827
Mbuti.DG	YR_LBIA	AR13-10K	DST_total	0.001021	3.534	25661	25139	511407
Mbuti.DG	AR_EN	LetuchayaMysh_7000BP	DST_total	0.002953	3.546	3926	3686	81452
Mbuti.DG	JPT.SG	AR13-10K	DST_total	0.000856	3.564	25996	25557	512482
Mbuti.DG	JPT.SG	AR_IA	DST_total	0.002298	3.583	2866	2737	55945
Mbuti.DG	AR_EN	Baikal_EN	DST_total	0.001183	3.591	17803	17391	347867
Mbuti.DG	AR_LN	Hezhen.DG	DST_total	0.002064	3.592	5218	5010	100486
Mbuti.DG	AR_EN	WLR_BA	DST_total	0.00205	3.596	10260	9845	202184
Mbuti.DG	AR_EN	Ulchi.DG	DST_total	0.001415	3.598	17279	16797	341315
Mbuti.DG	YR_MN	GaoHuaHua	DST_total	0.001049	3.601	48145	47181	919804
Mbuti.DG	HMMH_MN	AR13-10K	DST_total	0.001591	3.603	15226	14744	302969
Mbuti.DG	WLR_LN	LaCen	DST_total	0.001373	3.646	35556	34619	681866
Mbuti.DG	YR_LBIA	Lahu.DG	DST_total	0.001002	3.652	54090	53055	1032826
Mbuti.DG	Oroqen.DG	HMMH_MN	DST_total	0.001413	3.659	31416	30539	620811
Mbuti.DG	Yumin	Chuanyun	DST_total	0.00223	3.665	14606	13971	284829
Mbuti.DG	Baikal_EN	LetuchayaMysh_7000BP	DST_total	0.001465	3.669	10768	10439	224602
Mbuti.DG	Ulchi.DG	Mongolia_N_East	DST_total	0.001118	3.67	46698	45673	916971
Mbuti.DG	Mongola.DG	Xibo.DG	DST_total	0.001057	3.672	53481	52382	1039201
Mbuti.DG	Oroqen.DG	Mongolia_N_East	DST_total	0.001072	3.68	46625	45642	916982
Mbuti.DG	WLR_LN	Oroqen.DG	DST_total	0.001158	3.684	43943	42938	867935
Mbuti.DG	Japanese.DG	Mongola.DG	DST_total	0.000999	3.689	53690	52651	1039290
Mbuti.DG	WLR_LN	Mongolia_N_East	DST_total	0.001181	3.694	40438	39492	800220
Mbuti.DG	AR_LN	MiddleDorset.SG	DST_total	0.009557	3.697	474	396	8079
Mbuti.DG	AR_EN	AR14K	DST_total	0.002079	3.704	10149	9733	199895
Mbuti.DG	JPT.SG	Oroqen.DG	DST_total	0.000844	3.712	53106	52229	1039270
Mbuti.DG	JPT.SG	Mongola.DG	DST_total	0.000905	3.716	53949	53008	1039331
Mbuti.DG	YR_LN	Hezhen.DG	DST_total	0.000947	3.722	52989	52005	1038648
Mbuti.DG	DGD_IA	AR_IA	DST_total	0.005227	3.724	1464	1319	27704
Mbuti.DG	Mongolia_N_East	AR14K	DST_total	0.001335	3.742	27205	26493	533287
Mbuti.DG	AR_IA	Itelman.DG	DST_total	0.003383	3.753	2877	2691	54898
Mbuti.DG	WLR_BA	Mongolia_N_East	DST_total	0.001348	3.761	26697	25986	527248
Mbuti.DG	Mongola.DG	Atayal.DG	DST_total	0.001372	3.773	54334	52911	1037487
Mbuti.DG	YR_LBIA	Mongolia_N_East	DST_total	0.001014	3.782	47132	46187	931131
Mbuti.DG	Yumin	Shimao_LN	DST_total	0.00147	3.8	42158	40952	820103
Mbuti.DG	WLR_MN	Oroqen.DG	DST_total	0.001268	3.806	52772	51463	1032332
Mbuti.DG	Japanese.DG	Naxi.DG	DST_total	0.000953	3.816	54108	53117	1039334
Mbuti.DG	AR_IA	UstIda_LN	DST_total	0.003565	3.821	2758	2573	52010
Mbuti.DG	Eskimo_Chaplin.DG	UstIda_LN	DST_total	0.001465	3.832	50766	49356	962084
Mbuti.DG	Hezhen.DG	Mongolia_N_East	DST_total	0.001143	3.837	46501	45453	917033
Mbuti.DG	Mongolia_N_North	AR14K	DST_total	0.001186	3.84	27702	27055	545756
Mbuti.DG	AR_Xianbei_IA	DevilsCave_N	DST_total	0.001656	3.848	16978	16427	332828
Mbuti.DG	JPT.SG	Naxi.DG	DST_total	0.000834	3.855	54333	53466	1039379
Mbuti.DG	HMMH_MN	Baikal_EN	DST_total	0.001185	3.875	32477	31725	634566
Mbuti.DG	AR_IA	Korean.DG	DST_total	0.002857	3.884	2823	2666	54952
Mbuti.DG	YR_LN	LaCen	DST_total	0.001231	3.894	41106	40139	785975
Mbuti.DG	Mongolia_N_North	Oroqen.DG	DST_total	0.001035	3.901	50211	49190	986171
Mbuti.DG	Mongolia_N_East	WLR_MN	DST_total	0.001404	3.908	47921	46615	929649
Mbuti.DG	Mongolia_N_North	Miaozigou_MN	DST_total	0.001415	3.913	15552	15121	304570
Mbuti.DG	DGD_IA	LetuchayaMysh_7000BP	DST_total	0.002868	3.918	5426	5106	111434
Mbuti.DG	WLR_LN	Mongola.DG	DST_total	0.00122	3.919	44651	43592	867974
Mbuti.DG	Mongola.DG	ARpost9K	DST_total	0.000965	3.928	38642	37895	774781
Mbuti.DG	UstBelaya_EBA	Daur.DG	DST_total	0.001367	3.937	50981	49622	994420
Mbuti.DG	WLR_MN	Mongolia_N_North	DST_total	0.001172	3.961	51196	50023	1000292
Mbuti.DG	WLR_LN	GaoHuaHua	DST_total	0.001319	3.961	40929	39894	784899
Mbuti.DG	Miaozigou_MN	Tibetan.SG	DST_total	0.001213	3.972	16376	15995	313577
Mbuti.DG	AR_IA	Han.DG	DST_total	0.00273	3.975	2917	2764	55945
Mbuti.DG	Mongola.DG	LetuchayaMysh_7000BP	DST_total	0.001817	3.998	10584	10183	220925
Mbuti.DG	YR_LBIA	Shenxian	DST_total	0.0014	4.002	31429	30582	604301
Mbuti.DG	UstBelaya_EBA	Hezhen.DG	DST_total	0.00113	4.007	50694	49567	996775
Mbuti.DG	WLR_BA	Miao.DG	DST_total	0.001369	4.028	29480	28700	569380
Mbuti.DG	AR_IA	Dushan	DST_total	0.005342	4.049	1738	1565	32386
Mbuti.DG	Mongolia_N_East	Ulchi.DG	DST_total	0.001293	4.052	46859	45673	916971
Mbuti.DG	AR_IA	Japanese.DG	DST_total	0.002884	4.053	2841	2683	54953
Mbuti.DG	AR_IA	GaoHuaHua	DST_total	0.003782	4.07	2670	2479	50492
Mbuti.DG	WLR_BA	Oroqen.DG	DST_total	0.001382	4.074	28889	28101	569354
Mbuti.DG	Mongolia_N_North	Ulchi.DG	DST_total	0.0011	4.089	50152	49068	986161
Mbuti.DG	AR_IA	Baikal_EBA	DST_total	0.003236	4.093	2872	2694	54877
Mbuti.DG	UstBelaya_EBA	Kolyma_M	DST_total	0.001631	4.109	54206	52548	1016505
Mbuti.DG	DGD_IA	ARpost9K	DST_total	0.001527	4.117	19374	18789	383600
Mbuti.DG	YR_LBIA	Oroqen.DG	DST_total	0.001076	4.133	52461	51350	1032851
Mbuti.DG	AR_Xianbei_IA	ARpost9K	DST_total	0.001681	4.133	13112	12675	259837
Mbuti.DG	Yumin	Ulchi.DG	DST_total	0.00161	4.152	41057	39751	810985
Mbuti.DG	JPT.SG	Daur.DG	DST_total	0.001171	4.155	53656	52441	1036860
Mbuti.DG	Korean.DG	Lahu.DG	DST_total	0.001301	4.161	54656	53304	1039169
Mbuti.DG	Baikal_EN	ARpost9K	DST_total	0.000897	4.163	39434	38728	787452
Mbuti.DG	Mongola.DG	Daur.DG	DST_total	0.001494	4.164	53435	51886	1036805
Mbuti.DG	YR_LN	Shenxian	DST_total	0.001421	4.168	31554	30693	605872
Mbuti.DG	Yumin	DevilsCave_N	DST_total	0.001546	4.177	41719	40442	825602
Mbuti.DG	AR_IA	Kolyma_M	DST_total	0.00449	4.177	3023	2772	55811
Mbuti.DG	WLR_BA	Han.DG	DST_total	0.0012	4.178	30040	29343	580515
Mbuti.DG	DevilsCave_N	Miaozigou_MN	DST_total	0.001848	4.182	16245	15662	315232
Mbuti.DG	Mongola.DG	Shandong_EN	DST_total	0.00111	4.214	47674	46634	936192
Mbuti.DG	HMMH_MN	Oroqen.DG	DST_total	0.001594	4.224	31529	30539	620811
Mbuti.DG	AR_IA	Liangdao1	DST_total	0.0068	4.228	1148	1001	21541
Mbuti.DG	Miaozigou_MN	Kinh.DG	DST_total	0.001652	4.233	16196	15685	309534
Mbuti.DG	YR_MN	LaCen	DST_total	0.001478	4.234	41012	39854	783324
Mbuti.DG	Korean.DG	Oroqen.DG	DST_total	0.001162	4.237	52943	51735	1039190
Mbuti.DG	YR_LBIA	Ulchi.DG	DST_total	0.00113	4.238	52385	51218	1032842
Mbuti.DG	AR_Xianbei_IA	Miaozigou_MN	DST_total	0.003142	4.241	5374	5048	103681
Mbuti.DG	Mongolia_N_East	LetuchayaMysh_7000BP	DST_total	0.002123	4.25	10352	9900	212845
Mbuti.DG	AR_Xianbei_IA	AR14K	DST_total	0.002291	4.25	9557	9132	185475
Mbuti.DG	Mongolia_N_North	WLR_MN	DST_total	0.001275	4.277	51299	50023	1000292
Mbuti.DG	Baikal_EN	Miaozigou_MN	DST_total	0.001452	4.293	16114	15656	315500
Mbuti.DG	YR_LN	LetuchayaMysh_7000BP	DST_total	0.00179	4.297	10777	10375	224580
Mbuti.DG	Eskimo_Chaplin.DG	Daur.DG	DST_total	0.001875	4.311	53579	51637	1035809
Mbuti.DG	Mongolia_N_East	Miaozigou_MN	DST_total	0.001957	4.312	14733	14174	285786
Mbuti.DG	YR_LBIA	ARpost9K	DST_total	0.000972	4.318	39186	38423	785177
Mbuti.DG	AR_IA	Naxi.DG	DST_total	0.003094	4.346	2873	2703	54954
Mbuti.DG	Boisman_MN	Mongolia_N_East	DST_total	0.00118	4.355	45990	44927	900729
Mbuti.DG	DGD_IA	Ulchi.DG	DST_total	0.001751	4.36	25694	24817	500961
Mbuti.DG	AR_IA	Buryat.SG	DST_total	0.003567	4.364	2945	2746	55944
Mbuti.DG	AR_IA	Tujia.DG	DST_total	0.003177	4.425	2856	2682	54948
Mbuti.DG	Hezhen.DG	LetuchayaMysh_7000BP	DST_total	0.001995	4.432	10629	10189	220929
Mbuti.DG	Mongola.DG	Mongolia_N_East	DST_total	0.001333	4.438	46482	45259	917030
Mbuti.DG	WLR_BA	LetuchayaMysh_7000BP	DST_total	0.002867	4.452	6479	6095	133874
Mbuti.DG	Korean.DG	LetuchayaMysh_7000BP	DST_total	0.001958	4.457	10604	10171	220917
Mbuti.DG	WLR_MN	Japanese.DG	DST_total	0.001342	4.467	53554	52169	1032427
Mbuti.DG	DGD_IA	Miaozigou_MN	DST_total	0.0027	4.47	8099	7678	155834
Mbuti.DG	Japanese.DG	Kinh.DG	DST_total	0.001224	4.48	54636	53364	1039201
Mbuti.DG	Mongolia_N_North	Saqqaq.SG	DST_total	0.001646	4.484	50015	48433	961605
Mbuti.DG	JPT.SG	AR14K	DST_total	0.001179	4.487	27905	27259	547638
Mbuti.DG	Eskimo_Chaplin.DG	Chuanyun	DST_total	0.002381	4.493	15419	14706	299489
Mbuti.DG	AR_EN	Chuanyun	DST_total	0.003332	4.494	5615	5251	109106
Mbuti.DG	Mongola.DG	AR13-10K	DST_total	0.001367	4.497	25399	24709	504358
Mbuti.DG	WLR_LN	Hezhen.DG	DST_total	0.0014	4.529	44129	42914	867976
Mbuti.DG	Mongola.DG	Naxi.DG	DST_total	0.001215	4.539	54129	52866	1039301
Mbuti.DG	JPT.SG	ARpost9K	DST_total	0.000905	4.569	39651	38938	787479
Mbuti.DG	JPT.SG	Xibo.DG	DST_total	0.001052	4.579	53873	52780	1039265
Mbuti.DG	Ulchi.DG	Itelman.DG	DST_total	0.001759	4.584	54810	52984	1037804
Mbuti.DG	DevilsCave_N	HMMH_MN	DST_total	0.00181	4.587	32277	31130	634078
Mbuti.DG	AR_IA	Qihe3	DST_total	0.006285	4.597	1794	1586	33009
Mbuti.DG	YR_MN	Lahu.DG	DST_total	0.001434	4.615	54396	52913	1033525
Mbuti.DG	AR_LN	Liangdao1	DST_total	0.005656	4.623	1932	1723	37097
Mbuti.DG	AR_IA	Liangdao2	DST_total	0.005514	4.635	2528	2269	47048
Mbuti.DG	AR_IA	She.DG	DST_total	0.003594	4.652	2881	2683	54947
Mbuti.DG	AR_IA	CHB.SG	DST_total	0.002745	4.655	2897	2743	55945
Mbuti.DG	Eskimo_Chaplin.DG	Korean.DG	DST_total	0.001664	4.664	53569	51842	1038239
Mbuti.DG	YR_MN	Dai.DG	DST_total	0.001118	4.682	55447	54266	1056285
Mbuti.DG	HMMH_MN	AR14K	DST_total	0.002228	4.696	16380	15660	323380
Mbuti.DG	AR_IA	LaCen	DST_total	0.00505	4.715	2367	2142	44468
Mbuti.DG	UstBelaya_EBA	WLR_BA	DST_total	0.001528	4.739	28292	27440	558046
Mbuti.DG	Mongola.DG	Xiaogao	DST_total	0.00169	4.759	44295	42846	857635
Mbuti.DG	Baikal_EN	Baikal_EBA	DST_total	0.001091	4.776	54390	53255	1040282
Mbuti.DG	YR_LBIA	AR19K	DST_total	0.001726	4.78	36598	35376	707373
Mbuti.DG	AR_IA	Mongola.DG	DST_total	0.003592	4.792	2856	2658	54954
Mbuti.DG	Oroqen.DG	Miaozigou_MN	DST_total	0.001891	4.799	15876	15290	309563
Mbuti.DG	YR_LN	Lahu.DG	DST_total	0.001318	4.806	54677	53308	1038562
Mbuti.DG	Mongola.DG	AR14K	DST_total	0.001607	4.809	27307	26440	539381
Mbuti.DG	AR_IA	BaBanQinCen	DST_total	0.005082	4.811	2157	1952	40331
Mbuti.DG	Mongolia_N_East	DevilsCave_N	DST_total	0.001462	4.815	47740	46375	933881
Mbuti.DG	AR_IA	Lahu.DG	DST_total	0.003737	4.819	2905	2700	54945
Mbuti.DG	YR_LN	Mongolia_N_East	DST_total	0.001245	4.823	47464	46300	934582
Mbuti.DG	Hezhen.DG	Korean.DG	DST_total	0.001431	4.835	53647	52159	1039252
Mbuti.DG	WLR_BA	Hezhen.DG	DST_total	0.001597	4.842	28983	28074	569376
Mbuti.DG	JPT.SG	Kinh.DG	DST_total	0.001132	4.845	54892	53716	1039238
Mbuti.DG	AR_LN	Saqqaq.SG	DST_total	0.003802	4.846	5178	4808	97336
Mbuti.DG	AR_EN	WLR_MN	DST_total	0.002183	4.888	17711	16955	346191
Mbuti.DG	Mongolia_N_North	LetuchayaMysh_7000BP	DST_total	0.002055	4.931	10693	10238	221658
Mbuti.DG	HMMH_MN	Shandong_EN	DST_total	0.001778	4.942	29193	28176	572069
Mbuti.DG	WLR_LN	Liangdao1	DST_total	0.002503	4.949	16776	15955	327992
Mbuti.DG	AR_EN	Saqqaq.SG	DST_total	0.002725	4.951	17442	16531	334394
Mbuti.DG	YR_MN	Shenxian	DST_total	0.001893	4.962	31622	30478	604089
Mbuti.DG	AR_IA	Longlin	DST_total	0.009575	4.978	771	641	13528
Mbuti.DG	Yumin	Saqqaq.SG	DST_total	0.002512	4.979	41925	39903	804734
Mbuti.DG	YR_MN	Liangdao1	DST_total	0.002163	4.98	18982	18181	370511
Mbuti.DG	Yumin	Oroqen.DG	DST_total	0.001856	4.983	41253	39748	810996
Mbuti.DG	Eskimo_Chaplin.DG	Altai_5500BP	DST_total	0.00232	4.986	35356	33836	655063
Mbuti.DG	YR_LBIA	Tibetan.SG	DST_total	0.00099	4.988	54810	53771	1049080
Mbuti.DG	Japanese.DG	Japan_Jomon	DST_total	0.00177	4.988	47366	45811	878852
Mbuti.DG	UstBelaya_EBA	MiddleDorset.SG	DST_total	0.003963	4.99	4204	3900	76939
Mbuti.DG	WLR_MN	Mongola.DG	DST_total	0.001642	4.995	53829	52134	1032395
Mbuti.DG	WLR_BA	Mongola.DG	DST_total	0.001739	5.008	29416	28426	569375
Mbuti.DG	WLR_MN	Naxi.DG	DST_total	0.001549	5.013	54139	52540	1032437
Mbuti.DG	AR_IA	Ami.DG	DST_total	0.003896	5.028	2893	2679	54949
Mbuti.DG	Baikal_EN	AR13-10K	DST_total	0.001242	5.038	25907	25271	512471
Mbuti.DG	Miaozigou_MN	Lahu.DG	DST_total	0.002081	5.043	16299	15654	309549
Mbuti.DG	AR_Xianbei_IA	AR13-10K	DST_total	0.00251	5.044	8935	8499	173889
Mbuti.DG	Oroqen.DG	Itelman.DG	DST_total	0.001962	5.05	54864	52828	1037794
Mbuti.DG	Baikal_EN	WLR_MN	DST_total	0.001409	5.065	54229	52742	1055010
Mbuti.DG	Japanese.DG	LaCen	DST_total	0.001704	5.096	40500	39183	772889
Mbuti.DG	Eskimo_Chaplin.DG	WLR_BA	DST_total	0.002007	5.104	29028	27887	568844
Mbuti.DG	Eskimo_Chaplin.DG	Altai_7500BP	DST_total	0.002672	5.108	32884	31280	600212
Mbuti.DG	AR_EN	Daur.DG	DST_total	0.002372	5.111	17530	16723	340542
Mbuti.DG	AR_IA	Shenxian	DST_total	0.006779	5.158	1882	1647	34536
Mbuti.DG	AR_Xianbei_IA	Hezhen.DG	DST_total	0.002123	5.163	16876	16182	326832
Mbuti.DG	JPT.SG	Mongolia_N_East	DST_total	0.001184	5.174	47744	46637	934753
Mbuti.DG	YR_LN	Oroqen.DG	DST_total	0.001286	5.179	52990	51655	1038584
Mbuti.DG	Japanese.DG	Mongolia_N_East	DST_total	0.001378	5.184	46574	45310	917054
Mbuti.DG	Miaozigou_MN	LaCen	DST_total	0.002734	5.184	12925	12255	245053
Mbuti.DG	Mongolia_N_East	Oroqen.DG	DST_total	0.00153	5.2	47045	45642	916982
Mbuti.DG	AR_IA	Altai_6500BP	DST_total	0.008152	5.209	1282	1093	23139
Mbuti.DG	AR_Xianbei_IA	WLR_MN	DST_total	0.002476	5.228	17103	16283	331247
Mbuti.DG	AR_IA	Nahua.DG	DST_total	0.005151	5.229	2989	2706	54896
Mbuti.DG	Ulchi.DG	Eskimo_Chaplin.DG	DST_total	0.002048	5.234	54928	52803	1038188
Mbuti.DG	AR_LN	Shimao_LN	DST_total	0.00354	5.245	5408	5049	101623
Mbuti.DG	AR_IA	CHS.SG	DST_total	0.003164	5.257	2915	2738	55945
Mbuti.DG	AR_IA	Atayal.DG	DST_total	0.004696	5.289	2917	2659	54866
Mbuti.DG	AR_EN	Xiaogao	DST_total	0.002895	5.295	15651	14782	300208
Mbuti.DG	AR_LN	Mongolia_N_North	DST_total	0.002993	5.299	5120	4827	97956
Mbuti.DG	Oroqen.DG	LetuchayaMysh_7000BP	DST_total	0.002413	5.305	10698	10165	220909
Mbuti.DG	Yumin	Daur.DG	DST_total	0.00245	5.324	41779	39797	809198
Mbuti.DG	WLR_MN	Han.DG	DST_total	0.001437	5.327	55215	53699	1055018
Mbuti.DG	WLR_LN	Shenxian	DST_total	0.002307	5.347	27704	26483	529116
Mbuti.DG	YR_LBIA	Sherpa.DG	DST_total	0.001523	5.349	54123	52549	1032890
Mbuti.DG	UstBelaya_EBA	Russia_LBA.SG	DST_total	0.00299	5.35	11181	10569	204756
Mbuti.DG	AR_IA	Sherpa.DG	DST_total	0.004135	5.358	2902	2675	54955
Mbuti.DG	HMMH_MN	Hezhen.DG	DST_total	0.001998	5.363	31772	30531	620856
Mbuti.DG	Japanese.DG	GaoHuaHua	DST_total	0.001467	5.401	47555	46225	907147
Mbuti.DG	Miaozigou_MN	Shenxian	DST_total	0.003196	5.405	10065	9455	190808
Mbuti.DG	Mongola.DG	Kinh.DG	DST_total	0.001644	5.412	54731	53022	1039174
Mbuti.DG	Baikal_EN	Eskimo_Chaplin.DG	DST_total	0.001752	5.413	54600	52781	1038277
Mbuti.DG	DevilsCave_N	Mongolia_N_East	DST_total	0.001717	5.414	47979	46375	933881
Mbuti.DG	Miaozigou_MN	Liangdao1	DST_total	0.003836	5.425	6135	5680	118648
Mbuti.DG	Oroqen.DG	Mongolia_N_North	DST_total	0.001429	5.428	50600	49190	986171
Mbuti.DG	HMMH_MN	Xiaogao	DST_total	0.00272	5.438	27154	25728	524405
Mbuti.DG	Korean.DG	Mongolia_N_East	DST_total	0.001566	5.443	46679	45243	917021
Mbuti.DG	Oroqen.DG	Eskimo_Chaplin.DG	DST_total	0.002144	5.452	54925	52699	1038182
Mbuti.DG	Ulchi.DG	Even.DG	DST_total	0.00158	5.458	54180	52538	1039244
Mbuti.DG	Ulchi.DG	Saqqaq.SG	DST_total	0.002184	5.458	51461	49316	982412
Mbuti.DG	Boisman_MN	HMMH_MN	DST_total	0.001968	5.468	29829	28676	585823
Mbuti.DG	Mongolia_N_North	DevilsCave_N	DST_total	0.001484	5.47	51221	49729	1005334
Mbuti.DG	Korean.DG	Shenxian	DST_total	0.002193	5.472	31195	29889	595322
Mbuti.DG	WLR_LN	Sherpa.DG	DST_total	0.001805	5.481	45398	43831	867959
Mbuti.DG	Ulchi.DG	Miaozigou_MN	DST_total	0.00221	5.488	15936	15252	309547
Mbuti.DG	DevilsCave_N	Oroqen.DG	DST_total	0.001725	5.517	53548	51757	1038271
Mbuti.DG	Korean.DG	LaCen	DST_total	0.002008	5.543	40617	39065	772870
Mbuti.DG	AR_IA	Russia_LBA.SG	DST_total	0.012028	5.561	638	504	11157
Mbuti.DG	HMMH_MN	Daur.DG	DST_total	0.002459	5.578	31981	30458	619410
Mbuti.DG	YR_LN	Sherpa.DG	DST_total	0.001527	5.592	54609	53023	1038624
Mbuti.DG	YR_MN	Mongolia_N_North	DST_total	0.001407	5.603	51248	49838	1001922
Mbuti.DG	DGD_IA	WLR_BA	DST_total	0.003048	5.617	14825	13955	285366
Mbuti.DG	AR_Xianbei_IA	Mongolia_N_North	DST_total	0.002093	5.622	16531	15859	321028
Mbuti.DG	Japanese.DG	Shenxian	DST_total	0.002116	5.644	31154	29894	595337
Mbuti.DG	AR_IA	Kinh.DG	DST_total	0.004373	5.648	2923	2682	54948
Mbuti.DG	UstBelaya_EBA	UKY	DST_total	0.002317	5.661	30083	28739	579937
Mbuti.DG	AR_EN	Hezhen.DG	DST_total	0.002205	5.671	17489	16736	341346
Mbuti.DG	WLR_LN	Mongolia_N_North	DST_total	0.001531	5.68	43442	42133	854647
Mbuti.DG	Eskimo_Chaplin.DG	Buryat.SG	DST_total	0.002274	5.707	54524	52163	1038236
Mbuti.DG	JPT.SG	Dai.DG	DST_total	0.001096	5.725	56107	54942	1062378
Mbuti.DG	YR_LN	Tibetan.SG	DST_total	0.001103	5.73	55351	54187	1055110
Mbuti.DG	Miaozigou_MN	Tu.DG	DST_total	0.002307	5.731	16335	15621	309554
Mbuti.DG	Miaozigou_MN	Liangdao2	DST_total	0.003351	5.742	13863	12992	259859
Mbuti.DG	WLR_MN	Tujia.DG	DST_total	0.001894	5.765	54013	52057	1032314
Mbuti.DG	DGD_IA	Oroqen.DG	DST_total	0.002306	5.781	25868	24713	500975
Mbuti.DG	AR_Xianbei_IA	WLR_BA	DST_total	0.003261	5.796	9836	9217	189876
Mbuti.DG	WLR_BA_o	Mongolia_N_East	DST_total	0.002417	5.798	34321	32718	663087
Mbuti.DG	Korean.DG	Dusun.DG	DST_total	0.00175	5.8	55248	53430	1039148
Mbuti.DG	JPT.SG	GaoHuaHua	DST_total	0.001338	5.814	48760	47524	924104
Mbuti.DG	WLR_BA	Naxi.DG	DST_total	0.001767	5.815	29627	28621	569400
Mbuti.DG	UstBelaya_EBA	Karitiana.DG	DST_total	0.002008	5.817	54803	52757	1018595
Mbuti.DG	JPT.SG	AR19K	DST_total	0.001888	5.826	37074	35733	709662
Mbuti.DG	Hezhen.DG	Shimao_LN	DST_total	0.001866	5.848	53424	51505	1028318
Mbuti.DG	AR_IA	Tibetan.DG	DST_total	0.004553	5.851	2945	2695	54951
Mbuti.DG	AR_IA	Tibetan.SG	DST_total	0.00355	5.864	2939	2742	55637
Mbuti.DG	Mongolia_N_East	WLR_BA	DST_total	0.002148	5.871	27119	25986	527248
Mbuti.DG	WLR_LN	Tibetan.SG	DST_total	0.001362	5.872	45931	44732	880434
Mbuti.DG	Oroqen.DG	Saqqaq.SG	DST_total	0.002318	5.896	51523	49246	982425
Mbuti.DG	Korean.DG	Tu.DG	DST_total	0.001812	5.899	54787	52904	1039205
Mbuti.DG	YR_LBIA	Liangdao1	DST_total	0.002398	5.907	18960	18072	370580
Mbuti.DG	Baikal_EN	Itelman.DG	DST_total	0.001896	5.913	54667	52699	1037890
Mbuti.DG	DGD_IA	AR14K	DST_total	0.00306	5.924	13828	13011	266930
Mbuti.DG	Yumin	Korean.DG	DST_total	0.002233	5.937	41779	39968	811023
Mbuti.DG	Eskimo_Chaplin.DG	Upper_YR_IA	DST_total	0.002064	5.94	52086	50019	1001512
Mbuti.DG	WLR_BA	Kinh.DG	DST_total	0.002081	5.954	29942	28757	569316
Mbuti.DG	Yumin	AR19K	DST_total	0.003178	5.958	32732	30745	625446
Mbuti.DG	WLR_MN	Miao.DG	DST_total	0.001981	5.965	54213	52168	1032377
Mbuti.DG	YR_LBIA	Tu.DG	DST_total	0.001646	5.974	54222	52522	1032859
Mbuti.DG	AR_EN	MiddleDorset.SG	DST_total	0.008352	5.979	1641	1399	28943
Mbuti.DG	AR_IA	Miao.DG	DST_total	0.004498	5.981	2908	2660	54952
Mbuti.DG	AR_IA	Karitiana.DG	DST_total	0.005085	5.988	3030	2745	55943
Mbuti.DG	YR_MN	Tibetan.DG	DST_total	0.001763	5.999	54634	52812	1033577
Mbuti.DG	AR_IA	Tu.DG	DST_total	0.00436	6.016	2920	2680	54944
Mbuti.DG	Japanese.DG	Lahu.DG	DST_total	0.001747	6.017	54888	53072	1039210
Mbuti.DG	WLR_BA_o	HMMH_MN	DST_total	0.003184	6.025	23069	21644	447328
Mbuti.DG	Hezhen.DG	Japanese.DG	DST_total	0.001598	6.028	53922	52261	1039292
Mbuti.DG	AR_IA	Altai_7500BP	DST_total	0.007499	6.028	1978	1715	35072
Mbuti.DG	JPT.SG	LaCen	DST_total	0.001717	6.04	41509	40159	786054
Mbuti.DG	Korean.DG	Sherpa.DG	DST_total	0.001908	6.061	54792	52808	1039237
Mbuti.DG	Baikal_EN	AR14K	DST_total	0.001721	6.065	27829	26886	547627
Mbuti.DG	YR_LBIA	Dusun.DG	DST_total	0.001639	6.066	54729	53036	1032801
Mbuti.DG	WLR_BA	GaoHuaHua	DST_total	0.00227	6.075	27236	26061	517688
Mbuti.DG	Eskimo_Chaplin.DG	She.DG	DST_total	0.002306	6.082	54388	51994	1038096
Mbuti.DG	Yumin	Upper_YR_IA	DST_total	0.00223	6.087	41661	39868	803948
Mbuti.DG	AR_IA	Russia_EBA.SG	DST_total	0.014653	6.094	687	529	10809
Mbuti.DG	AR_EN	Koryak.SG	DST_total	0.002582	6.109	18128	17230	347841
Mbuti.DG	AR_Xianbei_IA	Chuanyun	DST_total	0.004734	6.129	5313	4832	101683
Mbuti.DG	AR_Xianbei_IA	Saqqaq.SG	DST_total	0.003479	6.141	16869	15760	318725
Mbuti.DG	Mongolia_N_East	Chuanyun	DST_total	0.002966	6.143	15455	14573	297256
Mbuti.DG	YR_LN	Liangdao1	DST_total	0.002317	6.151	19033	18172	371429
Mbuti.DG	Eskimo_Chaplin.DG	Japanese.DG	DST_total	0.002002	6.197	53931	51852	1038266
Mbuti.DG	WLR_LN	Dai.DG	DST_total	0.001681	6.21	46479	44990	885822
Mbuti.DG	Mongolia_N_North	Koryak.SG	DST_total	0.001779	6.213	52480	50690	1006212
Mbuti.DG	Mongola.DG	LaCen	DST_total	0.002224	6.217	40621	38902	772874
Mbuti.DG	Eskimo_Chaplin.DG	Chukchi.DG	DST_total	0.00336	6.224	58360	54875	1037177
Mbuti.DG	Eskimo_Chaplin.DG	Shimao_LN	DST_total	0.002266	6.24	53425	51098	1027303
Mbuti.DG	WLR_BA	Mongolia_N_North	DST_total	0.001887	6.246	28684	27624	561850
Mbuti.DG	Eskimo_Chaplin.DG	Mongola.DG	DST_total	0.002156	6.261	54089	51851	1038238
Mbuti.DG	AR_IA	Clovis.SG	DST_total	0.006666	6.268	3106	2734	55820
Mbuti.DG	WLR_BA	LaCen	DST_total	0.002662	6.271	23831	22627	452126
Mbuti.DG	Mongolia_N_North	WLR_BA	DST_total	0.001956	6.274	28722	27624	561850
Mbuti.DG	AR_LN	Shandong_EN	DST_total	0.004106	6.276	4908	4525	93215
Mbuti.DG	Korean.DG	Tibetan.SG	DST_total	0.001419	6.349	54213	52746	1033247
Mbuti.DG	Boisman_MN	Miaozigou_MN	DST_total	0.002486	6.393	15373	14634	297318
Mbuti.DG	WLR_BA	Shenxian	DST_total	0.003184	6.432	18515	17394	352016
Mbuti.DG	WLR_BA_o	Ulchi.DG	DST_total	0.00264	6.444	37514	35604	723703
Mbuti.DG	AR_IA	Dusun.DG	DST_total	0.00512	6.458	2951	2669	54946
Mbuti.DG	AR_LN	UKY	DST_total	0.006183	6.471	3274	2902	60115
Mbuti.DG	Mongola.DG	Mongolia_N_North	DST_total	0.001549	6.482	50360	48832	986228
Mbuti.DG	HMMH_MN	Upper_YR_IA	DST_total	0.002397	6.49	31775	30306	612974
Mbuti.DG	AR_IA	Dai.DG	DST_total	0.004287	6.491	2964	2724	55944
Mbuti.DG	Yumin	Koryak.SG	DST_total	0.002743	6.501	43092	40826	826310
Mbuti.DG	Eskimo_Chaplin.DG	Altai_6500BP	DST_total	0.003744	6.501	21046	19604	385160
Mbuti.DG	AR_Xianbei_IA	MiddleDorset.SG	DST_total	0.00911	6.501	1558	1310	27252
Mbuti.DG	DevilsCave_N	Hezhen.DG	DST_total	0.00203	6.502	53809	51701	1038335
Mbuti.DG	YR_MN	Dusun.DG	DST_total	0.001949	6.517	54974	52959	1033500
Mbuti.DG	HMMH_MN	Upper_YR_LN	DST_total	0.002202	6.519	32781	31390	631784
Mbuti.DG	AR_LN	Russia_LBA.SG	DST_total	0.010428	6.52	1227	1007	21105
Mbuti.DG	Yumin	WLR_LN	DST_total	0.002485	6.529	37374	35579	721833
Mbuti.DG	Mongolia_N_East	Xiaogao	DST_total	0.002633	6.538	43141	40980	820835
Mbuti.DG	Miaozigou_MN	Tibetan.DG	DST_total	0.002732	6.541	16443	15597	309558
Mbuti.DG	AR_Xianbei_IA	Xiaogao	DST_total	0.003548	6.553	14943	13937	283307
Mbuti.DG	AR_IA	USR	DST_total	0.007343	6.562	3153	2743	55899
Mbuti.DG	WLR_LN	Lahu.DG	DST_total	0.002202	6.573	45725	43813	867900
Mbuti.DG	Miaozigou_MN	Dushan	DST_total	0.004431	6.585	9565	8783	176478
Mbuti.DG	HMMH_MN	Chuanyun	DST_total	0.004131	6.607	9461	8710	181818
Mbuti.DG	Yumin	Hezhen.DG	DST_total	0.002466	6.615	41587	39587	811034
Mbuti.DG	HMMH_MN	Shimao_LN	DST_total	0.002675	6.632	32604	30922	628843
Mbuti.DG	AR_IA	Kazakhstan_Berel_IA	DST_total	0.006394	6.684	2931	2595	52484
Mbuti.DG	Mongola.DG	Lahu.DG	DST_total	0.002044	6.69	54964	52840	1039181
Mbuti.DG	Hezhen.DG	Mongola.DG	DST_total	0.002048	6.71	54236	52108	1039262
Mbuti.DG	Hezhen.DG	Shandong_EN	DST_total	0.001939	6.745	48103	46287	936195
Mbuti.DG	Miaozigou_MN	Saqqaq.SG	DST_total	0.003591	6.751	15892	14807	302025
Mbuti.DG	Mongolia_N_North	Xiaogao	DST_total	0.002377	6.768	44864	42820	859849
Mbuti.DG	HMMH_MN	WLR_LN	DST_total	0.002893	6.794	28020	26457	540523
Mbuti.DG	YR_LBIA	Mongolia_N_North	DST_total	0.001535	6.813	51168	49631	1001868
Mbuti.DG	Baikal_EN	Even.DG	DST_total	0.001608	6.816	54021	52350	1039365
Mbuti.DG	Hezhen.DG	Even.DG	DST_total	0.00195	6.818	54126	52099	1039312
Mbuti.DG	Eskimo_Chaplin.DG	Upper_YR_LN	DST_total	0.002124	6.823	53742	51548	1032816
Mbuti.DG	Mongolia_N_East	Hezhen.DG	DST_total	0.002185	6.825	47457	45453	917033
Mbuti.DG	Yumin	Itelman.DG	DST_total	0.00333	6.834	42736	40039	809979
Mbuti.DG	WLR_MN	Sherpa.DG	DST_total	0.002471	6.837	54829	52278	1032376
Mbuti.DG	Hezhen.DG	Koryak.SG	DST_total	0.002201	6.839	54252	51965	1039227
Mbuti.DG	HMMH_MN	Saqqaq.SG	DST_total	0.003452	6.841	31509	29434	601159
Mbuti.DG	Hezhen.DG	She.DG	DST_total	0.002098	6.878	54473	52293	1039114
Mbuti.DG	WLR_BA	Sherpa.DG	DST_total	0.002472	6.928	29937	28529	569361
Mbuti.DG	AR_IA	Mixe.DG	DST_total	0.005779	6.974	3018	2700	54954
Mbuti.DG	Mongolia_N_East	Shandong_EN	DST_total	0.002019	6.98	45634	43856	880765
Mbuti.DG	AR_Xianbei_IA	Even.DG	DST_total	0.002694	6.98	17125	16244	326847
Mbuti.DG	Mongola.DG	Shenxian	DST_total	0.002747	7.005	31257	29622	595330
Mbuti.DG	Japanese.DG	Dusun.DG	DST_total	0.002009	7.006	55353	53265	1039184
Mbuti.DG	AR_LN	Even.DG	DST_total	0.003819	7.013	5359	4975	100488
Mbuti.DG	AR_EN	Shandong_EN	DST_total	0.002888	7.022	16675	15740	323450
Mbuti.DG	Eskimo_Chaplin.DG	AR19K	DST_total	0.003555	7.026	36634	34156	697193
Mbuti.DG	WLR_BA	Liangdao1	DST_total	0.003776	7.03	11311	10486	218528
Mbuti.DG	Miaozigou_MN	MiddleDorset.SG	DST_total	0.010203	7.035	1506	1243	25721
Mbuti.DG	HMMH_MN	Korean.DG	DST_total	0.002664	7.04	32118	30464	620850
Mbuti.DG	Ulchi.DG	Mongolia_N_North	DST_total	0.00178	7.044	50823	49068	986161
Mbuti.DG	HMMH_MN	Koryak.SG	DST_total	0.002889	7.049	33092	31259	634504
Mbuti.DG	Miaozigou_MN	Koryak.SG	DST_total	0.003154	7.052	16567	15571	315470
Mbuti.DG	Mongola.DG	Sherpa.DG	DST_total	0.002232	7.078	54867	52548	1039239
Mbuti.DG	Mongolia_N_North	Shandong_EN	DST_total	0.001779	7.085	48042	46381	933256
Mbuti.DG	HMMH_MN	Even.DG	DST_total	0.002568	7.085	32262	30668	620883
Mbuti.DG	Eskimo_Chaplin.DG	Shandong_EN	DST_total	0.002295	7.089	48080	45933	935293
Mbuti.DG	Baikal_EN	Hezhen.DG	DST_total	0.001729	7.093	53442	51644	1039311
Mbuti.DG	YR_LN	Mongolia_N_North	DST_total	0.001583	7.116	51502	49909	1006084
Mbuti.DG	AR_EN	Yakut.DG	DST_total	0.002961	7.14	17845	16835	341317
Mbuti.DG	AR_LN	Koryak.SG	DST_total	0.00486	7.143	5530	5031	102569
Mbuti.DG	AR_Xianbei_IA	Koryak.SG	DST_total	0.003155	7.144	17589	16539	333077
Mbuti.DG	AR_LN	Korean.DG	DST_total	0.004162	7.169	5339	4921	100483
Mbuti.DG	Hezhen.DG	Mongolia_N_North	DST_total	0.001863	7.188	50612	48775	986228
Mbuti.DG	Yumin	Eskimo_Chaplin.DG	DST_total	0.003333	7.204	42652	39952	810256
Mbuti.DG	AR_LN	Shenxian	DST_total	0.007186	7.208	3318	2887	59969
Mbuti.DG	YR_LBIA	Tibetan.DG	DST_total	0.002023	7.214	54660	52570	1032879
Mbuti.DG	Boisman_MN	Oroqen.DG	DST_total	0.001935	7.219	49394	47540	958460
Mbuti.DG	Mongola.DG	Dai.DG	DST_total	0.001763	7.238	54726	52894	1039329
Mbuti.DG	AR_EN	Even.DG	DST_total	0.002707	7.241	17742	16818	341354
Mbuti.DG	Baikal_EN	Yakut.DG	DST_total	0.002061	7.26	54468	52325	1039251
Mbuti.DG	AR_EN	Shimao_LN	DST_total	0.003141	7.271	17986	16902	345239
Mbuti.DG	AR_EN	Eskimo_Chaplin.DG	DST_total	0.003406	7.271	17990	16828	341014
Mbuti.DG	AR_LN	Upper_YR_LN	DST_total	0.004358	7.306	5456	5011	102146
Mbuti.DG	HMMH_MN	Mongola.DG	DST_total	0.002776	7.307	32376	30653	620851
Mbuti.DG	Korean.DG	Mongolia_N_North	DST_total	0.001872	7.308	50548	48701	986215
Mbuti.DG	AR_IA	Baojianshan	DST_total	0.008425	7.318	2474	2106	43640
Mbuti.DG	Eskimo_Chaplin.DG	Tujia.DG	DST_total	0.002657	7.329	54493	51734	1038168
Mbuti.DG	Japanese.DG	Liangdao1	DST_total	0.002807	7.351	18767	17741	365626
Mbuti.DG	Korean.DG	Liangdao1	DST_total	0.003138	7.37	18862	17715	365621
Mbuti.DG	YR_LN	Dusun.DG	DST_total	0.002003	7.397	55376	53296	1038537
Mbuti.DG	AR_LN	Upper_YR_IA	DST_total	0.00458	7.41	5323	4868	99342
Mbuti.DG	WLR_LN	Dusun.DG	DST_total	0.0024	7.424	46057	43975	867878
Mbuti.DG	Hezhen.DG	Eskimo_Chaplin.DG	DST_total	0.002791	7.444	55015	52117	1038247
Mbuti.DG	Mongolia_N_North	Baikal_EBA	DST_total	0.001853	7.467	51770	49945	985034
Mbuti.DG	AR_IA	Thai.DG	DST_total	0.005805	7.475	2991	2672	54951
Mbuti.DG	Baikal_EN	Daur.DG	DST_total	0.002319	7.479	53949	51545	1036840
Mbuti.DG	Mongola.DG	AR19K	DST_total	0.00298	7.505	36441	34361	697859
Mbuti.DG	YR_MN	Saqqaq.SG	DST_total	0.0028	7.512	52333	49536	998704
Mbuti.DG	AR_EN	Itelman.DG	DST_total	0.003535	7.555	18048	16843	340897
Mbuti.DG	Eskimo_Chaplin.DG	Miao.DG	DST_total	0.002662	7.565	54578	51814	1038224
Mbuti.DG	Mongolia_N_North	Hezhen.DG	DST_total	0.002077	7.58	50823	48775	986228
Mbuti.DG	Hezhen.DG	Tujia.DG	DST_total	0.002294	7.58	54459	52075	1039188
Mbuti.DG	WLR_BA_o	Miaozigou_MN	DST_total	0.004418	7.583	11948	10943	227345
Mbuti.DG	AR_EN	WLR_LN	DST_total	0.003519	7.591	15766	14701	302511
Mbuti.DG	Oroqen.DG	Shimao_LN	DST_total	0.002387	7.606	53783	51328	1028258
Mbuti.DG	Ulchi.DG	Korean.DG	DST_total	0.002246	7.61	54260	51926	1039196
Mbuti.DG	Yumin	Liangdao1	DST_total	0.004178	7.638	17805	16374	342602
Mbuti.DG	WLR_MN	Koryak.SG	DST_total	0.002572	7.673	55486	52773	1054914
Mbuti.DG	WLR_BA	Lahu.DG	DST_total	0.002758	7.676	30122	28552	569337
Mbuti.DG	Miaozigou_MN	Qihe3	DST_total	0.004855	7.678	9975	9081	184208
Mbuti.DG	Mongola.DG	GaoHuaHua	DST_total	0.002339	7.685	47856	45734	907118
Mbuti.DG	AR_Xianbei_IA	Eskimo_Chaplin.DG	DST_total	0.003913	7.71	17469	16191	326514
Mbuti.DG	Miaozigou_MN	Eskimo_Chaplin.DG	DST_total	0.003853	7.718	16504	15313	309250
Mbuti.DG	Eskimo_Chaplin.DG	WLR_LN	DST_total	0.002711	7.719	45020	42669	867130
Mbuti.DG	WLR_MN	Saqqaq.SG	DST_total	0.003246	7.741	52706	49468	997401
Mbuti.DG	Mongola.DG	BaBanQinCen	DST_total	0.002232	7.768	36324	34775	694160
Mbuti.DG	HMMH_MN	Yakut.DG	DST_total	0.003201	7.773	32580	30593	620826
Mbuti.DG	AR_Xianbei_IA	Baikal_EN	DST_total	0.002522	7.775	17383	16543	333111
Mbuti.DG	Korean.DG	Tibetan.DG	DST_total	0.002409	7.821	55311	52807	1039216
Mbuti.DG	AR_LN	Mongola.DG	DST_total	0.004433	7.834	5378	4932	100487
Mbuti.DG	Mongolia_N_East	Koryak.SG	DST_total	0.002557	7.836	49221	46831	934687
Mbuti.DG	Yumin	Sherpa.DG	DST_total	0.003173	7.849	42886	40313	811013
Mbuti.DG	HMMH_MN	Japanese.DG	DST_total	0.002753	7.85	32261	30552	620873
Mbuti.DG	YR_MN	Liangdao2	DST_total	0.002972	7.85	44766	42277	837460
Mbuti.DG	Mongolia_N_North	Eskimo_Chaplin.DG	DST_total	0.002713	7.859	52169	49496	985260
Mbuti.DG	Yumin	UKY	DST_total	0.004396	7.863	26975	24725	511764
Mbuti.DG	WLR_LN	Liangdao2	DST_total	0.003356	7.902	38795	36358	726066
Mbuti.DG	HMMH_MN	AR19K	DST_total	0.004232	7.91	22340	20540	425372
Mbuti.DG	Yumin	Japanese.DG	DST_total	0.002661	7.913	42127	39969	811049
Mbuti.DG	HMMH_MN	Eskimo_Chaplin.DG	DST_total	0.00383	7.914	32914	30538	620279
Mbuti.DG	AR_LN	Eskimo_Chaplin.DG	DST_total	0.005636	7.926	5484	4918	100387
Mbuti.DG	AR_LN	Kolyma_M	DST_total	0.006437	7.935	5721	5062	102365
Mbuti.DG	AR_Xianbei_IA	Daur.DG	DST_total	0.003851	7.937	17167	15911	326071
Mbuti.DG	Yumin	Naxi.DG	DST_total	0.002733	7.94	42562	40346	811069
Mbuti.DG	Miaozigou_MN	Even.DG	DST_total	0.002983	7.965	16153	15230	309580
Mbuti.DG	Hezhen.DG	Miao.DG	DST_total	0.002371	7.978	54639	52176	1039246
Mbuti.DG	Baikal_EN	WLR_BA	DST_total	0.00219	8.012	29776	28505	580510
Mbuti.DG	AR_Xianbei_IA	Yakut.DG	DST_total	0.003474	8.025	17324	16189	326801
Mbuti.DG	Yumin	Mongola.DG	DST_total	0.003002	8.034	42283	39848	811030
Mbuti.DG	Hezhen.DG	Itelman.DG	DST_total	0.003022	8.051	55093	51956	1037864
Mbuti.DG	Oroqen.DG	Mongola.DG	DST_total	0.0025	8.053	54574	51975	1039200
Mbuti.DG	WLR_BA_o	Hezhen.DG	DST_total	0.003333	8.064	37984	35572	723749
Mbuti.DG	Baikal_EN	Eskimo_Naukan.DG	DST_total	0.002298	8.079	55169	52780	1039287
Mbuti.DG	AR_LN	Tujia.DG	DST_total	0.004829	8.084	5406	4921	100476
Mbuti.DG	WLR_BA_o	Oroqen.DG	DST_total	0.003191	8.104	37854	35545	723710
Mbuti.DG	Yumin	She.DG	DST_total	0.003161	8.121	42553	39990	810924
Mbuti.DG	Mongolia_N_East	Saqqaq.SG	DST_total	0.003383	8.121	47620	44584	897375
Mbuti.DG	DevilsCave_N	Shandong_EN	DST_total	0.002395	8.128	49556	47274	952976
Mbuti.DG	Miaozigou_MN	Dusun.DG	DST_total	0.003324	8.131	16583	15554	309539
Mbuti.DG	AR_EN	Buryat.SG	DST_total	0.00372	8.135	18400	17107	347848
Mbuti.DG	Mongola.DG	Dusun.DG	DST_total	0.002592	8.137	55542	52848	1039157
Mbuti.DG	AR_LN	Itelman.DG	DST_total	0.00567	8.162	5456	4887	100352
Mbuti.DG	AR_EN	Upper_YR_LN	DST_total	0.003158	8.168	18041	16947	346506
Mbuti.DG	Oroqen.DG	Korean.DG	DST_total	0.002409	8.186	54239	51735	1039190
Mbuti.DG	Boisman_MN	Mongolia_N_North	DST_total	0.001961	8.193	49525	47649	957051
Mbuti.DG	Boisman_MN	Shandong_EN	DST_total	0.002088	8.195	47433	45522	914770
Mbuti.DG	AR_LN	She.DG	DST_total	0.004898	8.207	5432	4940	100473
Mbuti.DG	Mongolia_N_East	Daur.DG	DST_total	0.003122	8.227	48055	45199	914898
Mbuti.DG	WLR_MN	Eskimo_Chaplin.DG	DST_total	0.003475	8.227	55048	51464	1031376
Mbuti.DG	Hezhen.DG	Saqqaq.SG	DST_total	0.003236	8.233	51738	48559	982475
Mbuti.DG	Mongolia_N_North	Even.DG	DST_total	0.002164	8.26	51437	49302	986278
Mbuti.DG	Mongola.DG	Itelman.DG	DST_total	0.002984	8.284	54974	51877	1037862
Mbuti.DG	Mongola.DG	Eskimo_Chaplin.DG	DST_total	0.003018	8.285	54984	51851	1038238
Mbuti.DG	HMMH_MN	Itelman.DG	DST_total	0.003928	8.298	32811	30375	619993
Mbuti.DG	Hezhen.DG	Han.DG	DST_total	0.00202	8.364	54446	52346	1039330
Mbuti.DG	YR_MN	Qihe3	DST_total	0.00347	8.374	31635	29594	588254
Mbuti.DG	WLR_BA	Tu.DG	DST_total	0.002867	8.375	30082	28450	569352
Mbuti.DG	Eskimo_Chaplin.DG	Ami.DG	DST_total	0.003156	8.377	55038	51761	1038199
Mbuti.DG	Mongola.DG	Koryak.SG	DST_total	0.002584	8.401	54326	51641	1039226
Mbuti.DG	AR_EN	Baikal_EBA	DST_total	0.003393	8.402	18003	16845	341204
Mbuti.DG	WLR_BA	MiddleDorset.SG	DST_total	0.008793	8.404	2719	2301	47485
Mbuti.DG	Korean.DG	Eskimo_Chaplin.DG	DST_total	0.00319	8.421	55154	51842	1038239
Mbuti.DG	WLR_MN	Liangdao1	DST_total	0.004119	8.429	19267	17743	369998
Mbuti.DG	AR_LN	Miao.DG	DST_total	0.004946	8.429	5410	4913	100483
Mbuti.DG	Japanese.DG	Sherpa.DG	DST_total	0.002457	8.455	55013	52459	1039269
Mbuti.DG	Miaozigou_MN	Longlin	DST_total	0.007897	8.463	4092	3524	71992
Mbuti.DG	AR_EN	Korean.DG	DST_total	0.003307	8.486	17739	16610	341337
Mbuti.DG	Baikal_EN	Eskimo_Sireniki.DG	DST_total	0.002398	8.487	55122	52630	1039306
Mbuti.DG	Boisman_MN	Hezhen.DG	DST_total	0.00234	8.496	49724	47481	958513
Mbuti.DG	WLR_BA_o	LetuchayaMysh_7000BP	DST_total	0.005435	8.502	8270	7376	164521
Mbuti.DG	HMMH_MN	Xibo.DG	DST_total	0.0032	8.505	32374	30387	620812
Mbuti.DG	Miaozigou_MN	Eskimo_Naukan.DG	DST_total	0.003807	8.524	16499	15320	309558
Mbuti.DG	HMMH_MN	Baikal_EBA	DST_total	0.003049	8.537	32767	30867	623175
Mbuti.DG	Yumin	Tujia.DG	DST_total	0.003383	8.543	42546	39802	810969
Mbuti.DG	Eskimo_Chaplin.DG	Atayal.DG	DST_total	0.003832	8.557	55266	51294	1036506
Mbuti.DG	YR_LBIA	Liangdao2	DST_total	0.003013	8.562	44707	42183	837649
Mbuti.DG	AR_LN	Japanese.DG	DST_total	0.004528	8.576	5382	4927	100486
Mbuti.DG	AR_IA	Kyrgyz.DG	DST_total	0.006549	8.576	3030	2670	54949
Mbuti.DG	Miaozigou_MN	Itelman.DG	DST_total	0.004056	8.589	16447	15193	309138
Mbuti.DG	WLR_LN	Tibetan.DG	DST_total	0.002752	8.594	45971	43582	867945
Mbuti.DG	AR_Xianbei_IA	Itelman.DG	DST_total	0.004405	8.606	17555	16117	326406
Mbuti.DG	Mongolia_N_North	Chuanyun	DST_total	0.003454	8.616	15750	14703	303131
Mbuti.DG	AR_EN	AR19K	DST_total	0.004835	8.621	13032	11843	245896
Mbuti.DG	AR_Xianbei_IA	Korean.DG	DST_total	0.003393	8.637	17154	16045	326823
Mbuti.DG	AR_EN	Mongola.DG	DST_total	0.00355	8.642	17887	16676	341337
Mbuti.DG	Mongola.DG	Tu.DG	DST_total	0.00249	8.646	55017	52430	1039208
Mbuti.DG	Mongola.DG	Even.DG	DST_total	0.002384	8.676	54190	51712	1039306
Mbuti.DG	Baikal_EN	Xiaogao	DST_total	0.002705	8.678	45633	43272	873090
Mbuti.DG	AR_Xianbei_IA	Shimao_LN	DST_total	0.003808	8.684	17494	16236	330325
Mbuti.DG	AR_LN	Longlin	DST_total	0.012728	8.684	1318	1038	21952
Mbuti.DG	Mongola.DG	Tibetan.SG	DST_total	0.001844	8.691	54323	52418	1033254
Mbuti.DG	AR_Xianbei_IA	Liangdao1	DST_total	0.006368	8.702	6540	5754	123369
Mbuti.DG	AR_IA	Minoan_Odigitria	DST_total	0.01779	8.707	959	697	14718
Mbuti.DG	Mongola.DG	Saqqaq.SG	DST_total	0.003287	8.709	51628	48399	982471
Mbuti.DG	Eskimo_Chaplin.DG	Naxi.DG	DST_total	0.002954	8.711	54847	51780	1038279
Mbuti.DG	Japanese.DG	Mongolia_N_North	DST_total	0.001993	8.729	50652	48686	986252
Mbuti.DG	HMMH_MN	Naxi.DG	DST_total	0.003092	8.747	32640	30720	620877
Mbuti.DG	AR_EN	Upper_YR_IA	DST_total	0.003671	8.747	17700	16458	338340
Mbuti.DG	Yumin	Shenxian	DST_total	0.004633	8.749	29047	26524	544429
Mbuti.DG	WLR_BA	Liangdao2	DST_total	0.004033	8.753	25853	23917	480063
Mbuti.DG	Mongolia_N_North	Itelman.DG	DST_total	0.002986	8.759	52323	49383	984905
Mbuti.DG	WLR_BA	Koryak.SG	DST_total	0.00328	8.764	30381	28477	580461
Mbuti.DG	WLR_LN	Dushan	DST_total	0.004111	8.781	26383	24373	488817
Mbuti.DG	HMMH_MN	Liangdao1	DST_total	0.005401	8.786	11902	10667	228693
Mbuti.DG	DevilsCave_N	Japanese.DG	DST_total	0.002544	8.797	54626	51985	1038359
Mbuti.DG	AR_LN	Liangdao2	DST_total	0.007994	8.801	4639	3979	82637
Mbuti.DG	Mongola.DG	Liangdao1	DST_total	0.00386	8.815	18944	17533	365620
Mbuti.DG	WLR_MN	Tibetan.SG	DST_total	0.002212	8.821	55653	53333	1048668
Mbuti.DG	Baikal_EN	UstIda_LN	DST_total	0.002336	8.822	52438	50139	984091
Mbuti.DG	HMMH_MN	She.DG	DST_total	0.003517	8.826	32688	30505	620764
Mbuti.DG	AR_EN	UKY	DST_total	0.005318	8.844	11121	10003	210186
Mbuti.DG	AR_LN	GaoHuaHua	DST_total	0.006429	8.879	4951	4371	90235
Mbuti.DG	YR_LN	Tibetan.DG	DST_total	0.002341	8.88	55279	52847	1038614
Mbuti.DG	Ulchi.DG	Eskimo_Naukan.DG	DST_total	0.002995	8.893	55695	52582	1039184
Mbuti.DG	Yumin	Miao.DG	DST_total	0.003405	8.905	42622	39861	811020
Mbuti.DG	Mongolia_N_East	Shimao_LN	DST_total	0.002826	8.921	48761	46143	926570
Mbuti.DG	Yumin	Xibo.DG	DST_total	0.003101	8.926	42136	39621	810974
Mbuti.DG	WLR_BA	Saqqaq.SG	DST_total	0.00403	8.933	29346	27103	556623
Mbuti.DG	Eskimo_Chaplin.DG	CHB.SG	DST_total	0.002209	8.935	54181	51887	1038298
Mbuti.DG	Eskimo_Chaplin.DG	Tu.DG	DST_total	0.003283	8.942	55282	51873	1038195
Mbuti.DG	DevilsCave_N	Saqqaq.SG	DST_total	0.003724	8.942	53335	49600	1002771
Mbuti.DG	Eskimo_Chaplin.DG	Han.DG	DST_total	0.002688	8.953	54541	51750	1038296
Mbuti.DG	Oroqen.DG	Eskimo_Sireniki.DG	DST_total	0.00295	8.956	55514	52449	1039199
Mbuti.DG	YR_LN	Liangdao2	DST_total	0.0031	8.958	45021	42416	840309
Mbuti.DG	Japanese.DG	Tibetan.SG	DST_total	0.001834	8.977	54411	52516	1033287
Mbuti.DG	Korean.DG	Liangdao2	DST_total	0.003586	8.986	44269	41309	825486
Mbuti.DG	Mongolia_N_East	Upper_YR_LN	DST_total	0.002515	8.991	48845	46505	930463
Mbuti.DG	Japanese.DG	Liangdao2	DST_total	0.003237	8.991	44197	41525	825510
Mbuti.DG	Miaozigou_MN	Kolyma_M	DST_total	0.005155	8.993	17199	15576	314764
Mbuti.DG	Yumin	Even.DG	DST_total	0.003061	8.998	42289	39806	811069
Mbuti.DG	AR_EN	Xibo.DG	DST_total	0.003413	9.003	17785	16620	341314
Mbuti.DG	DevilsCave_N	Shimao_LN	DST_total	0.002829	9.008	55391	52421	1049749
Mbuti.DG	WLR_MN	Shenxian	DST_total	0.004033	9.019	32213	29780	603343
Mbuti.DG	AR_IA	Japan_Jomon	DST_total	0.008592	9.042	2822	2390	50295
Mbuti.DG	YR_LBIA	Qihe3	DST_total	0.003347	9.051	31596	29627	588307
Mbuti.DG	HMMH_MN	Tujia.DG	DST_total	0.003402	9.053	32597	30485	620811
Mbuti.DG	DevilsCave_N	Eskimo_Chaplin.DG	DST_total	0.003725	9.059	55714	51850	1037299
Mbuti.DG	Yumin	LaCen	DST_total	0.004541	9.06	37193	34045	693188
Mbuti.DG	Mongolia_N_North	Daur.DG	DST_total	0.003038	9.077	51448	48458	983906
Mbuti.DG	WLR_MN	Tu.DG	DST_total	0.003107	9.081	55097	51890	1032341
Mbuti.DG	Yumin	Buryat.SG	DST_total	0.003729	9.084	43766	40684	826340
Mbuti.DG	DevilsCave_N	Korean.DG	DST_total	0.002787	9.094	54538	51645	1038318
Mbuti.DG	Oroqen.DG	Japanese.DG	DST_total	0.002489	9.101	54519	51933	1039229
Mbuti.DG	Mongola.DG	Buryat.SG	DST_total	0.003017	9.112	54896	51761	1039269
Mbuti.DG	WLR_MN	Even.DG	DST_total	0.002779	9.126	54224	51355	1032447
Mbuti.DG	HMMH_MN	MiddleDorset.SG	DST_total	0.009463	9.144	2757	2300	48340
Mbuti.DG	YR_LBIA	Saqqaq.SG	DST_total	0.003274	9.147	52492	49223	998185
Mbuti.DG	WLR_LN	Saqqaq.SG	DST_total	0.003861	9.151	44636	41363	847802
Mbuti.DG	Oroqen.DG	Shandong_EN	DST_total	0.002546	9.164	48470	46087	936135
Mbuti.DG	YR_LBIA	Thai.DG	DST_total	0.002542	9.179	55424	52799	1032849
Mbuti.DG	WLR_MN	Kinh.DG	DST_total	0.003042	9.181	55267	52127	1032306
Mbuti.DG	AR_LN	LaCen	DST_total	0.007782	9.183	4336	3734	77442
Mbuti.DG	Oroqen.DG	Eskimo_Naukan.DG	DST_total	0.003115	9.191	55715	52479	1039178
Mbuti.DG	Mongolia_N_East	Even.DG	DST_total	0.002745	9.195	48266	45749	917074
Mbuti.DG	HMMH_MN	Shenxian	DST_total	0.004772	9.2	19343	17595	366268
Mbuti.DG	Korean.DG	Koryak.SG	DST_total	0.002843	9.206	54509	51554	1039216
Mbuti.DG	Ulchi.DG	Shandong_EN	DST_total	0.002705	9.221	48630	46098	936135
Mbuti.DG	WLR_BA	Tibetan.DG	DST_total	0.003271	9.235	30327	28464	569354
Mbuti.DG	WLR_MN	Lahu.DG	DST_total	0.003188	9.249	55296	52005	1032312
Mbuti.DG	Mongola.DG	Tibetan.DG	DST_total	0.002677	9.276	55323	52541	1039227
Mbuti.DG	DevilsCave_N	Mongolia_N_North	DST_total	0.002602	9.292	52344	49729	1005334
Mbuti.DG	Eskimo_Chaplin.DG	Shenxian	DST_total	0.00436	9.315	31704	29111	594758
Mbuti.DG	YR_MN	Koryak.SG	DST_total	0.002663	9.324	55354	52542	1056182
Mbuti.DG	WLR_MN	LaCen	DST_total	0.003798	9.336	41913	38943	782174
Mbuti.DG	Ulchi.DG	Japanese.DG	DST_total	0.002559	9.337	54589	51930	1039223
Mbuti.DG	WLR_LN	Koryak.SG	DST_total	0.003131	9.346	46381	43609	885738
Mbuti.DG	WLR_MN	Tibetan.DG	DST_total	0.003277	9.348	55477	52094	1032363
Mbuti.DG	Baikal_EN	Chuanyun	DST_total	0.003476	9.365	15817	14759	304506
Mbuti.DG	AR_LN	Han.DG	DST_total	0.00495	9.368	5557	5049	102580
Mbuti.DG	Yumin	Eskimo_Naukan.DG	DST_total	0.003864	9.37	43170	40036	811014
Mbuti.DG	HMMH_MN	Buryat.SG	DST_total	0.003965	9.386	33658	31142	634531
Mbuti.DG	AR_Xianbei_IA	AR19K	DST_total	0.005417	9.391	12477	11218	232413
Mbuti.DG	Mongolia_N_North	Yakut.DG	DST_total	0.002833	9.398	51943	49149	986171
Mbuti.DG	YR_MN	Eskimo_Chaplin.DG	DST_total	0.003386	9.435	54911	51414	1032591
Mbuti.DG	Japanese.DG	Eskimo_Chaplin.DG	DST_total	0.003201	9.436	55176	51852	1038266
Mbuti.DG	WLR_BA	Tibetan.SG	DST_total	0.002453	9.44	30376	28961	576966
Mbuti.DG	Yumin	Baikal_EBA	DST_total	0.003297	9.445	42605	39940	808293
Mbuti.DG	Miaozigou_MN	Thai.DG	DST_total	0.003809	9.466	16711	15532	309545
Mbuti.DG	Oroqen.DG	She.DG	DST_total	0.003065	9.468	55112	51927	1039049
Mbuti.DG	Mongolia_N_East	Itelman.DG	DST_total	0.003786	9.482	49136	45669	915813
Mbuti.DG	Mongolia_N_East	Upper_YR_IA	DST_total	0.00287	9.483	47828	45226	906515
Mbuti.DG	Korean.DG	Thai.DG	DST_total	0.002774	9.486	55984	53101	1039198
Mbuti.DG	WLR_BA	Qihe3	DST_total	0.004803	9.489	18451	16819	339815
Mbuti.DG	AR_Xianbei_IA	Buryat.SG	DST_total	0.004529	9.5	17888	16379	333092
Mbuti.DG	AR_Xianbei_IA	Shandong_EN	DST_total	0.003909	9.508	16084	14884	306931
Mbuti.DG	AR_LN	Naxi.DG	DST_total	0.005387	9.515	5485	4944	100488
Mbuti.DG	Mongolia_N_North	Upper_YR_LN	DST_total	0.002269	9.519	52311	50038	1001421
Mbuti.DG	HMMH_MN	Eskimo_Naukan.DG	DST_total	0.003909	9.523	33094	30667	620839
Mbuti.DG	AR_Xianbei_IA	Xibo.DG	DST_total	0.003761	9.524	17249	16020	326807
Mbuti.DG	DevilsCave_N	Koryak.SG	DST_total	0.003206	9.537	56312	52910	1061179
Mbuti.DG	WLR_LN	Eskimo_Chaplin.DG	DST_total	0.0039	9.552	46050	42669	867130
Mbuti.DG	Ulchi.DG	Eskimo_Sireniki.DG	DST_total	0.00321	9.555	55689	52353	1039200
Mbuti.DG	Yumin	Eskimo_Sireniki.DG	DST_total	0.003782	9.558	43095	40027	811028
Mbuti.DG	AR_IA	Tianyuan	DST_total	0.011427	9.564	2846	2299	47881
Mbuti.DG	WLR_LN	Qihe3	DST_total	0.004203	9.569	27560	25408	511929
Mbuti.DG	Japanese.DG	Itelman.DG	DST_total	0.003422	9.57	55270	51718	1037879
Mbuti.DG	Hezhen.DG	Naxi.DG	DST_total	0.002759	9.598	54955	52088	1039305
Mbuti.DG	Japanese.DG	Saqqaq.SG	DST_total	0.003515	9.623	51806	48353	982499
Mbuti.DG	Mongolia_N_East	AR19K	DST_total	0.004089	9.628	35941	33180	675069
Mbuti.DG	Ulchi.DG	Kolyma_M	DST_total	0.004198	9.631	56887	52533	1037104
Mbuti.DG	Mongolia_N_East	Eskimo_Chaplin.DG	DST_total	0.003665	9.658	49065	45707	916138
Mbuti.DG	YR_MN	Thai.DG	DST_total	0.002851	9.661	55685	52738	1033550
Mbuti.DG	WLR_BA	Eskimo_Chaplin.DG	DST_total	0.004039	9.669	30184	27887	568844
Mbuti.DG	Mongola.DG	Baikal_EN	DST_total	0.002168	9.676	53893	51640	1039310
Mbuti.DG	WLR_LN	Thai.DG	DST_total	0.003081	9.685	46604	43930	867939
Mbuti.DG	AR_EN	Shenxian	DST_total	0.005733	9.694	11409	10188	213084
Mbuti.DG	Baikal_EN	Korean.DG	DST_total	0.002415	9.704	54095	51584	1039299
Mbuti.DG	AR_LN	Eskimo_Sireniki.DG	DST_total	0.005908	9.706	5494	4900	100482
Mbuti.DG	Japanese.DG	Koryak.SG	DST_total	0.00276	9.709	54500	51631	1039256
Mbuti.DG	AR_EN	YR_LBIA	DST_total	0.003514	9.709	18184	16966	346616
Mbuti.DG	Yumin	GaoHuaHua	DST_total	0.003662	9.716	40623	37828	763025
Mbuti.DG	Miaozigou_MN	Eskimo_Sireniki.DG	DST_total	0.004162	9.724	16529	15241	309569
Mbuti.DG	AR_Xianbei_IA	WLR_LN	DST_total	0.004593	9.729	15171	13858	285809
Mbuti.DG	AR_EN	Yi.DG	DST_total	0.003715	9.74	17970	16702	341323
Mbuti.DG	AR_Xianbei_IA	Upper_YR_LN	DST_total	0.003792	9.74	17598	16340	331741
Mbuti.DG	HMMH_MN	Sherpa.DG	DST_total	0.003888	9.762	33019	30605	620837
Mbuti.DG	WLR_BA	Itelman.DG	DST_total	0.004052	9.762	30180	27876	568623
Mbuti.DG	Baikal_EN	Shimao_LN	DST_total	0.002383	9.772	54914	52410	1050743
Mbuti.DG	WLR_MN	Itelman.DG	DST_total	0.003907	9.776	55216	51188	1030984
Mbuti.DG	Mongolia_N_North	AR19K	DST_total	0.003652	9.777	37019	34459	701062
Mbuti.DG	Yumin	Tibetan.SG	DST_total	0.002699	9.787	43241	41025	820890
Mbuti.DG	AR_LN	Eskimo_Naukan.DG	DST_total	0.005954	9.791	5540	4942	100477
Mbuti.DG	HMMH_MN	Kolyma_M	DST_total	0.005353	9.805	34615	31225	633166
Mbuti.DG	Mongolia_N_North	Shimao_LN	DST_total	0.002634	9.825	52159	49534	996898
Mbuti.DG	Yumin	Han.DG	DST_total	0.003165	9.825	43379	40764	826357
Mbuti.DG	Oroqen.DG	Tujia.DG	DST_total	0.002979	9.827	54943	51847	1039127
Mbuti.DG	Yumin	CHB.SG	DST_total	0.00268	9.832	43082	40867	826367
Mbuti.DG	Baikal_EN	Upper_YR_LN	DST_total	0.002224	9.845	55216	52867	1056596
Mbuti.DG	Korean.DG	Saqqaq.SG	DST_total	0.003829	9.88	51939	48177	982467
Mbuti.DG	Eskimo_Chaplin.DG	LaCen	DST_total	0.004687	9.88	41499	37880	772149
Mbuti.DG	Yumin	MiddleDorset.SG	DST_total	0.009113	9.928	4109	3459	71310
Mbuti.DG	AR_Xianbei_IA	UKY	DST_total	0.006611	9.963	10580	9277	197032
Mbuti.DG	Yumin	Xitoucun	DST_total	0.004272	9.967	26466	24339	497857
Mbuti.DG	WLR_MN	GaoHuaHua	DST_total	0.003332	9.985	49151	46090	918682
Mbuti.DG	YR_LBIA	Eskimo_Chaplin.DG	DST_total	0.003466	9.985	54795	51218	1031884
Mbuti.DG	Mongolia_N_East	Yakut.DG	DST_total	0.003367	9.998	48713	45625	916974
Mbuti.DG	WLR_BA_o	Mongolia_N_North	DST_total	0.003499	10.008	37219	34738	708983
Mbuti.DG	Eskimo_Chaplin.DG	CHS.SG	DST_total	0.002534	10.012	54454	51823	1038298
Mbuti.DG	HMMH_MN	Miao.DG	DST_total	0.003741	10.022	32751	30429	620848
Mbuti.DG	Eskimo_Chaplin.DG	Sherpa.DG	DST_total	0.003721	10.029	55470	51607	1038227
Mbuti.DG	Mongolia_N_East	WLR_LN	DST_total	0.003285	10.033	42121	39492	800220
Mbuti.DG	Yumin	Kolyma_M	DST_total	0.005383	10.038	45108	40669	824674
Mbuti.DG	AR_Xianbei_IA	Shenxian	DST_total	0.006141	10.048	10867	9642	199458
Mbuti.DG	WLR_LN	Itelman.DG	DST_total	0.003969	10.064	46038	42598	866820
Mbuti.DG	Eskimo_Chaplin.DG	Lahu.DG	DST_total	0.00386	10.065	55623	51615	1038173
Mbuti.DG	Eskimo_Chaplin.DG	Tibetan.DG	DST_total	0.003666	10.074	55720	51914	1038214
Mbuti.DG	YR_MN	Dushan	DST_total	0.003987	10.092	29948	27744	552758
Mbuti.DG	AR_LN	Sherpa.DG	DST_total	0.005892	10.1	5509	4917	100482
Mbuti.DG	Miaozigou_MN	Russia_LBA.SG	DST_total	0.009353	10.14	3633	3033	64183
Mbuti.DG	YR_LBIA	Koryak.SG	DST_total	0.002856	10.144	55330	52316	1055343
Mbuti.DG	AR_EN	Eskimo_Naukan.DG	DST_total	0.004245	10.147	18219	16770	341339
Mbuti.DG	HMMH_MN	Han.DG	DST_total	0.00333	10.155	33405	31292	634565
Mbuti.DG	AR_EN	Eskimo_Sireniki.DG	DST_total	0.004336	10.169	18237	16757	341337
Mbuti.DG	AR_IA	Andronovo	DST_total	0.016782	10.172	1343	990	21035
Mbuti.DG	AR_Xianbei_IA	Upper_YR_IA	DST_total	0.00424	10.178	17178	15805	323740
Mbuti.DG	AR_EN	Japanese.DG	DST_total	0.003631	10.18	17867	16628	341349
Mbuti.DG	Ulchi.DG	Mongola.DG	DST_total	0.003053	10.183	54912	51739	1039197
Mbuti.DG	AR_IA	AR33K	DST_total	0.012196	10.184	3012	2404	49787
Mbuti.DG	AR_EN	Liangdao1	DST_total	0.007098	10.19	7069	6125	133103
Mbuti.DG	Mongolia_N_North	Korean.DG	DST_total	0.00274	10.194	51404	48701	986215
Mbuti.DG	Mongolia_N_East	Xibo.DG	DST_total	0.003196	10.22	48311	45380	916979
Mbuti.DG	YR_LN	Thai.DG	DST_total	0.002755	10.224	55980	53118	1038586
Mbuti.DG	AR_Xianbei_IA	Tujia.DG	DST_total	0.004356	10.226	17444	16021	326803
Mbuti.DG	Mongolia_N_North	Eskimo_Naukan.DG	DST_total	0.003194	10.228	52653	49503	986209
Mbuti.DG	HMMH_MN	LaCen	DST_total	0.005165	10.233	25234	22799	471414
Mbuti.DG	AR_Xianbei_IA	YR_MN	DST_total	0.00417	10.238	17614	16231	331682
Mbuti.DG	Oroqen.DG	Miao.DG	DST_total	0.003105	10.251	55162	51935	1039182
Mbuti.DG	WLR_BA	Dusun.DG	DST_total	0.003746	10.252	30620	28488	569323
Mbuti.DG	YR_LN	Saqqaq.SG	DST_total	0.003534	10.261	52949	49404	1003062
Mbuti.DG	Yumin	BaBanQinCen	DST_total	0.004042	10.266	33465	30916	630622
Mbuti.DG	Baikal_EN	Kolyma_M	DST_total	0.003799	10.277	57803	53776	1060114
Mbuti.DG	Japanese.DG	Tibetan.DG	DST_total	0.003008	10.29	55576	52449	1039258
Mbuti.DG	Korean.DG	Even.DG	DST_total	0.002867	10.296	54471	51492	1039301
Mbuti.DG	AR_IA	CentralSaka	DST_total	0.008997	10.331	3204	2711	54864
Mbuti.DG	WLR_BA	Even.DG	DST_total	0.003325	10.344	29772	27879	569398
Mbuti.DG	Yumin	Tibetan.DG	DST_total	0.003993	10.351	43349	40110	811003
Mbuti.DG	Baikal_EN	UKY	DST_total	0.003678	10.371	31855	29633	603974
Mbuti.DG	HMMH_MN	Eskimo_Sireniki.DG	DST_total	0.004245	10.377	33146	30510	620859
Mbuti.DG	DevilsCave_N	Mongola.DG	DST_total	0.003254	10.379	55055	51676	1038329
Mbuti.DG	Mongolia_N_North	WLR_LN	DST_total	0.002851	10.385	44570	42133	854647
Mbuti.DG	Mongola.DG	Kolyma_M	DST_total	0.004233	10.399	56531	52141	1037168
Mbuti.DG	AR_Xianbei_IA	Eskimo_Naukan.DG	DST_total	0.004664	10.401	17664	16140	326826
Mbuti.DG	Mongola.DG	Liangdao2	DST_total	0.003968	10.415	44401	41125	825499
Mbuti.DG	AR_EN	Xitoucun	DST_total	0.005631	10.425	10520	9419	195616
Mbuti.DG	Eskimo_Chaplin.DG	Kinh.DG	DST_total	0.00366	10.456	55555	51756	1038153
Mbuti.DG	Baikal_EN	Buryat.SG	DST_total	0.003064	10.457	56374	53119	1062267
Mbuti.DG	YR_LN	Qihe3	DST_total	0.003721	10.459	31871	29675	589991
Mbuti.DG	Mongolia_N_East	Buryat.SG	DST_total	0.003774	10.467	50008	46480	934716
Mbuti.DG	AR_EN	She.DG	DST_total	0.004321	10.471	18075	16601	341297
Mbuti.DG	HMMH_MN	Atayal.DG	DST_total	0.005112	10.481	33241	30073	619798
Mbuti.DG	YR_LBIA	Baikal_EN	DST_total	0.002171	10.524	54764	52472	1055447
Mbuti.DG	WLR_BA_o	Eskimo_Chaplin.DG	DST_total	0.005317	10.529	39344	35499	723065
Mbuti.DG	AR_IA	Chukchi.DG	DST_total	0.009174	10.546	3153	2649	54903
Mbuti.DG	Hezhen.DG	Lahu.DG	DST_total	0.003362	10.557	55617	52123	1039189
Mbuti.DG	HMMH_MN	CHB.SG	DST_total	0.002835	10.558	33142	31344	634571
Mbuti.DG	Hezhen.DG	Eskimo_Naukan.DG	DST_total	0.003625	10.564	55723	51955	1039245
Mbuti.DG	Baikal_EN	Shandong_EN	DST_total	0.002408	10.606	49284	46987	953848
Mbuti.DG	Eskimo_Chaplin.DG	Russia_LBA.SG	DST_total	0.006179	10.621	11646	10361	207881
Mbuti.DG	Hezhen.DG	Kinh.DG	DST_total	0.003189	10.627	55531	52217	1039172
Mbuti.DG	AR_Xianbei_IA	Atayal.DG	DST_total	0.00533	10.636	17663	15924	326243
Mbuti.DG	DevilsCave_N	She.DG	DST_total	0.00349	10.64	55351	51727	1038181
Mbuti.DG	AR_IA	CentralSteppe_EMBA	DST_total	0.009815	10.65	3267	2718	55943
Mbuti.DG	AR_EN	Tujia.DG	DST_total	0.004296	10.669	18046	16579	341319
Mbuti.DG	AR_EN	Kolyma_M	DST_total	0.0059	10.684	19105	17057	347130
Mbuti.DG	Ulchi.DG	She.DG	DST_total	0.003368	10.699	55270	51770	1039046
Mbuti.DG	HMMH_MN	UKY	DST_total	0.005967	10.741	19591	17393	368319
Mbuti.DG	AR_Xianbei_IA	Mongola.DG	DST_total	0.004235	10.753	17411	16027	326826
Mbuti.DG	AR_Xianbei_IA	Russia_LBA.SG	DST_total	0.010032	10.768	3855	3181	67092
Mbuti.DG	WLR_LN	MiddleDorset.SG	DST_total	0.008973	10.772	4062	3422	71410
Mbuti.DG	Korean.DG	Qihe3	DST_total	0.004446	10.795	31460	28880	580275
Mbuti.DG	Yumin	Dushan	DST_total	0.005845	10.8	28082	25099	510501
Mbuti.DG	Hezhen.DG	Shenxian	DST_total	0.004235	10.81	31693	29171	595329
Mbuti.DG	Mongolia_N_North	Eskimo_Sireniki.DG	DST_total	0.003249	10.822	52621	49416	986223
Mbuti.DG	Mongolia_N_North	Upper_YR_IA	DST_total	0.002778	10.83	51138	48431	974304
Mbuti.DG	Eskimo_Chaplin.DG	GaoHuaHua	DST_total	0.003895	10.832	48387	44857	906243
Mbuti.DG	DevilsCave_N	Itelman.DG	DST_total	0.004516	10.832	56082	51399	1036913
Mbuti.DG	Japanese.DG	Thai.DG	DST_total	0.003039	10.834	56129	52971	1039229
Mbuti.DG	WLR_MN	Eskimo_Naukan.DG	DST_total	0.004007	10.837	55614	51477	1032370
Mbuti.DG	DevilsCave_N	Upper_YR_IA	DST_total	0.003192	10.84	54161	50897	1022551
Mbuti.DG	Mongolia_N_East	Korean.DG	DST_total	0.003291	10.859	48261	45243	917021
Mbuti.DG	Eskimo_Chaplin.DG	Liangdao2	DST_total	0.005331	10.904	44866	40469	824707
Mbuti.DG	AR_LN	Nahua.DG	DST_total	0.008038	10.921	5706	4899	100364
Mbuti.DG	Mongolia_N_East	Eskimo_Naukan.DG	DST_total	0.003926	10.927	49406	45806	917007
Mbuti.DG	Hezhen.DG	Eskimo_Sireniki.DG	DST_total	0.003787	10.929	55688	51753	1039264
Mbuti.DG	Hezhen.DG	LaCen	DST_total	0.004046	10.944	41333	38206	772877
Mbuti.DG	AR_EN	Miao.DG	DST_total	0.004291	10.947	18079	16615	341334
Mbuti.DG	Eskimo_Chaplin.DG	Liangdao1	DST_total	0.005436	10.954	19195	17209	365259
Mbuti.DG	AR_LN	Qihe3	DST_total	0.010826	11.005	3380	2747	58450
Mbuti.DG	Yumin	Tu.DG	DST_total	0.004267	11.009	43346	39885	810992
Mbuti.DG	Oroqen.DG	Kolyma_M	DST_total	0.004723	11.016	57055	52157	1037111
Mbuti.DG	AR_IA	Russia_IA.SG	DST_total	0.009675	11.032	3215	2683	54959
Mbuti.DG	AR_LN	Lahu.DG	DST_total	0.006789	11.037	5561	4879	100479
Mbuti.DG	Oroqen.DG	Han.DG	DST_total	0.00277	11.041	54960	52081	1039269
Mbuti.DG	AR_LN	USR	DST_total	0.008805	11.046	5922	5020	102497
Mbuti.DG	Mongola.DG	Eskimo_Naukan.DG	DST_total	0.003542	11.048	55586	51905	1039237
Mbuti.DG	AR_LN	Tu.DG	DST_total	0.006394	11.05	5539	4896	100478
Mbuti.DG	Ulchi.DG	Shimao_LN	DST_total	0.003293	11.052	54273	50888	1028255
Mbuti.DG	YR_LBIA	Dushan	DST_total	0.004138	11.056	29877	27588	552968
Mbuti.DG	AR_Xianbei_IA	She.DG	DST_total	0.004736	11.063	17548	16000	326785
Mbuti.DG	Yumin	Liangdao2	DST_total	0.00543	11.063	39604	35657	726871
Mbuti.DG	WLR_BA	Dushan	DST_total	0.005844	11.069	17860	15953	326347
Mbuti.DG	Japanese.DG	Even.DG	DST_total	0.002863	11.081	54500	51525	1039337
Mbuti.DG	AR_EN	Longlin	DST_total	0.009753	11.082	4656	3862	81387
Mbuti.DG	WLR_BA	Thai.DG	DST_total	0.003928	11.086	30750	28514	569349
Mbuti.DG	Baikal_EN	AR19K	DST_total	0.00384	11.101	37483	34758	709644
Mbuti.DG	Mongolia_N_North	Buryat.SG	DST_total	0.003448	11.123	53526	50056	1006249
Mbuti.DG	Mongolia_N_North	UKY	DST_total	0.004273	11.136	31214	28694	589905
Mbuti.DG	Mongola.DG	Eskimo_Sireniki.DG	DST_total	0.003568	11.155	55474	51766	1039258
Mbuti.DG	Mongolia_N_North	UstIda_LN	DST_total	0.003269	11.166	49968	46923	931332
Mbuti.DG	Ulchi.DG	Miao.DG	DST_total	0.003393	11.181	55347	51820	1039177
Mbuti.DG	Mongola.DG	Thai.DG	DST_total	0.003343	11.21	56174	52700	1039198
Mbuti.DG	Boisman_MN	Saqqaq.SG	DST_total	0.004016	11.22	49899	46135	937103
Mbuti.DG	AR_EN	Naxi.DG	DST_total	0.00421	11.224	18141	16703	341354
Mbuti.DG	YR_MN	Even.DG	DST_total	0.002987	11.226	54173	51085	1033660
Mbuti.DG	Yumin	Lahu.DG	DST_total	0.004492	11.227	43457	39814	810965
Mbuti.DG	Mongolia_N_East	Mongola.DG	DST_total	0.003672	11.244	48626	45259	917030
Mbuti.DG	Baikal_EN	Upper_YR_IA	DST_total	0.002644	11.27	53695	50989	1023517
Mbuti.DG	DevilsCave_N	Even.DG	DST_total	0.003378	11.274	55049	51541	1038382
Mbuti.DG	WLR_BA_o	MiddleDorset.SG	DST_total	0.01194	11.278	3465	2770	58139
Mbuti.DG	Japanese.DG	Qihe3	DST_total	0.004276	11.28	31406	28924	580286
Mbuti.DG	AR_LN	Kinh.DG	DST_total	0.006282	11.3	5542	4911	100474
Mbuti.DG	AR_IA	Anatolia_IA	DST_total	0.016913	11.311	1844	1357	28837
Mbuti.DG	Ulchi.DG	Tujia.DG	DST_total	0.003467	11.321	55239	51637	1039121
Mbuti.DG	Eskimo_Chaplin.DG	Tibetan.SG	DST_total	0.003052	11.329	54812	51661	1032230
Mbuti.DG	WLR_BA_o	Even.DG	DST_total	0.004442	11.352	38737	35522	723776
Mbuti.DG	Eskimo_Chaplin.DG	BaBanQinCen	DST_total	0.003902	11.364	36855	34149	693492
Mbuti.DG	WLR_LN	Kolyma_M	DST_total	0.004864	11.366	48150	43850	883959
Mbuti.DG	HMMH_MN	Tibetan.DG	DST_total	0.004352	11.372	33357	30655	620831
Mbuti.DG	Baikal_EN	Mongola.DG	DST_total	0.002899	11.392	54653	51640	1039310
Mbuti.DG	YR_LN	Eskimo_Chaplin.DG	DST_total	0.003673	11.392	55348	51537	1037614
Mbuti.DG	YR_MN	MiddleDorset.SG	DST_total	0.00809	11.397	4570	3922	80157
Mbuti.DG	AR_EN	BaBanQinCen	DST_total	0.005604	11.398	13228	11842	247364
Mbuti.DG	AR_IA	Dali_EBA	DST_total	0.014181	11.406	2706	2095	43101
Mbuti.DG	Mongolia_N_East	Baikal_EBA	DST_total	0.003343	11.425	48871	45812	914942
Mbuti.DG	Korean.DG	Itelman.DG	DST_total	0.004022	11.456	55519	51345	1037854
Mbuti.DG	HMMH_MN	Qihe3	DST_total	0.006277	11.472	19789	17512	362729
Mbuti.DG	AR_IA	MA1_HG.SG	DST_total	0.015525	11.475	2590	1964	40308
Mbuti.DG	AR_Xianbei_IA	Eskimo_Sireniki.DG	DST_total	0.00496	11.488	17679	16058	326831
Mbuti.DG	YR_MN	Itelman.DG	DST_total	0.003986	11.494	55145	51031	1032209
Mbuti.DG	Hezhen.DG	Liangdao1	DST_total	0.004917	11.525	19131	17333	365623
Mbuti.DG	Hezhen.DG	Kolyma_M	DST_total	0.004872	11.533	56903	51849	1037177
Mbuti.DG	WLR_BA_o	Koryak.SG	DST_total	0.005013	11.54	39750	36051	737816
Mbuti.DG	Yumin	CHS.SG	DST_total	0.003122	11.541	43343	40763	826367
Mbuti.DG	HMMH_MN	Xitoucun	DST_total	0.005396	11.552	17774	15979	332726
Mbuti.DG	Mongolia_N_North	Mongola.DG	DST_total	0.003091	11.559	51881	48832	986228
Mbuti.DG	WLR_BA	Eskimo_Naukan.DG	DST_total	0.00447	11.585	30456	27911	569357
Mbuti.DG	YR_LBIA	Buryat.SG	DST_total	0.003555	11.586	56012	52260	1055390
Mbuti.DG	DevilsCave_N	Tujia.DG	DST_total	0.003717	11.586	55381	51522	1038247
Mbuti.DG	Korean.DG	Eskimo_Naukan.DG	DST_total	0.003903	11.602	55744	51688	1039225
Mbuti.DG	Hezhen.DG	Sherpa.DG	DST_total	0.00368	11.617	55628	51804	1039246
Mbuti.DG	WLR_MN	Dusun.DG	DST_total	0.004039	11.631	56000	51831	1032285
Mbuti.DG	DevilsCave_N	Shenxian	DST_total	0.005045	11.632	32706	29652	605437
Mbuti.DG	Japanese.DG	Eskimo_Naukan.DG	DST_total	0.003696	11.64	55722	51880	1039264
Mbuti.DG	WLR_LN	Even.DG	DST_total	0.003417	11.654	45381	42415	868013
Mbuti.DG	HMMH_MN	Russia_LBA.SG	DST_total	0.00907	11.656	7360	6194	128542
Mbuti.DG	YR_LN	Koryak.SG	DST_total	0.003173	11.659	55951	52583	1061402
Mbuti.DG	Mongolia_N_East	MiddleDorset.SG	DST_total	0.00909	11.663	4344	3658	75561
Mbuti.DG	HMMH_MN	Tu.DG	DST_total	0.0043	11.684	33151	30481	620823
Mbuti.DG	WLR_BA_o	Saqqaq.SG	DST_total	0.006164	11.685	38246	33912	703179
Mbuti.DG	DevilsCave_N	UKY	DST_total	0.005657	11.689	32497	29083	603501
Mbuti.DG	Boisman_MN	Korean.DG	DST_total	0.003205	11.691	50365	47293	958500
Mbuti.DG	AR_EN	Han.DG	DST_total	0.004071	11.705	18388	16972	347866
Mbuti.DG	YR_LBIA	Even.DG	DST_total	0.002982	11.736	54080	50999	1032961
Mbuti.DG	Yumin	Longlin	DST_total	0.007942	11.74	11987	10315	210453
Mbuti.DG	YR_LN	Dushan	DST_total	0.004243	11.749	30073	27722	554221
Mbuti.DG	HMMH_MN	GaoHuaHua	DST_total	0.004833	11.767	29661	26990	552615
Mbuti.DG	Korean.DG	Dushan	DST_total	0.004812	11.797	29687	27064	545074
Mbuti.DG	WLR_BA	Kolyma_M	DST_total	0.005566	11.797	31703	28480	579204
Mbuti.DG	Ulchi.DG	MiddleDorset.SG	DST_total	0.00814	11.819	4537	3893	79056
Mbuti.DG	HMMH_MN	CHS.SG	DST_total	0.003239	11.834	33335	31280	634571
Mbuti.DG	Eskimo_Chaplin.DG	CentralSteppe_EMBA	DST_total	0.005488	11.837	59907	54210	1038132
Mbuti.DG	Eskimo_Chaplin.DG	Dusun.DG	DST_total	0.004411	11.856	56297	51718	1038147
Mbuti.DG	Hezhen.DG	GaoHuaHua	DST_total	0.003518	11.857	48428	45236	907129
Mbuti.DG	WLR_LN	Eskimo_Sireniki.DG	DST_total	0.004055	11.867	46261	42742	867974
Mbuti.DG	Mongolia_N_East	Tujia.DG	DST_total	0.003889	11.874	48854	45288	916961
Mbuti.DG	HMMH_MN	UstIda_LN	DST_total	0.004827	11.893	31910	29053	591921
Mbuti.DG	AR_EN	CHB.SG	DST_total	0.003594	11.898	18265	17014	347867
Mbuti.DG	AR_Xianbei_IA	Yi.DG	DST_total	0.004665	11.909	17505	15980	326812
Mbuti.DG	YR_LBIA	Itelman.DG	DST_total	0.00396	11.912	55038	50953	1031503
Mbuti.DG	AR_Xianbei_IA	Miao.DG	DST_total	0.004832	11.931	17539	15960	326827
Mbuti.DG	Yumin	Atayal.DG	DST_total	0.005374	11.932	43543	39192	809695
Mbuti.DG	DevilsCave_N	Eskimo_Naukan.DG	DST_total	0.004441	11.954	56401	51790	1038305
Mbuti.DG	Mongolia_N_East	Shenxian	DST_total	0.005231	11.962	31465	28426	580979
Mbuti.DG	Oroqen.DG	MiddleDorset.SG	DST_total	0.0081	11.967	4537	3896	79056
Mbuti.DG	AR_Xianbei_IA	YR_LN	DST_total	0.004215	11.974	17711	16307	333018
Mbuti.DG	AR_Xianbei_IA	LaCen	DST_total	0.006494	11.986	14147	12476	257341
Mbuti.DG	AR_LN	Tibetan.DG	DST_total	0.007167	11.986	5599	4879	100481
Mbuti.DG	Baikal_EN	WLR_LN	DST_total	0.003026	12.005	46251	43571	885822
Mbuti.DG	WLR_MN	Eskimo_Sireniki.DG	DST_total	0.004276	12.016	55673	51258	1032392
Mbuti.DG	HMMH_MN	Lahu.DG	DST_total	0.004817	12.024	33343	30352	620812
Mbuti.DG	Baikal_EN	Xibo.DG	DST_total	0.002949	12.029	54501	51437	1039245
Mbuti.DG	DevilsCave_N	Han.DG	DST_total	0.003256	12.045	56587	53132	1061280
Mbuti.DG	AR_IA	Okunevo_EMBA	DST_total	0.009228	12.053	3259	2743	55944
Mbuti.DG	AR_Xianbei_IA	Japanese.DG	DST_total	0.004304	12.07	17329	15922	326836
Mbuti.DG	AR_EN	Sherpa.DG	DST_total	0.005102	12.072	18322	16581	341335
Mbuti.DG	Oroqen.DG	Naxi.DG	DST_total	0.003443	12.082	55435	51856	1039242
Mbuti.DG	WLR_MN	Liangdao2	DST_total	0.005328	12.085	45693	41238	836241
Mbuti.DG	DevilsCave_N	Kolyma_M	DST_total	0.00534	12.1	58815	53159	1059100
Mbuti.DG	WLR_BA_o	Itelman.DG	DST_total	0.005811	12.111	39494	35294	722771
Mbuti.DG	Eskimo_Chaplin.DG	Dai.DG	DST_total	0.003695	12.112	55478	51641	1038297
Mbuti.DG	Baikal_EN	MiddleDorset.SG	DST_total	0.007271	12.125	4560	3976	80394
Mbuti.DG	WLR_MN	Kolyma_M	DST_total	0.005437	12.13	58287	52563	1052835
Mbuti.DG	Yumin	UstIda_LN	DST_total	0.004792	12.134	41164	37507	763209
Mbuti.DG	Mongolia_N_East	Liangdao1	DST_total	0.005757	12.165	19026	16969	357391
Mbuti.DG	Mongolia_N_East	She.DG	DST_total	0.003932	12.18	48949	45344	916906
Mbuti.DG	Ulchi.DG	UKY	DST_total	0.005358	12.18	31681	28507	592260
Mbuti.DG	AR_Xianbei_IA	BaBanQinCen	DST_total	0.005973	12.185	12609	11222	232134
Mbuti.DG	AR_IA	Early_Sarmatian_IA	DST_total	0.015409	12.217	2383	1807	37335
Mbuti.DG	Mongolia_N_North	Xibo.DG	DST_total	0.003262	12.221	51806	48589	986165
Mbuti.DG	Oroqen.DG	UKY	DST_total	0.005462	12.223	31732	28498	592251
Mbuti.DG	Mongolia_N_East	Japanese.DG	DST_total	0.003447	12.231	48471	45310	917054
Mbuti.DG	AR_Xianbei_IA	Naxi.DG	DST_total	0.004788	12.247	17603	16038	326844
Mbuti.DG	Japanese.DG	Kolyma_M	DST_total	0.00465	12.259	56695	51872	1037200
Mbuti.DG	AR_EN	LaCen	DST_total	0.006359	12.271	14807	13071	273025
Mbuti.DG	HMMH_MN	Liangdao2	DST_total	0.00639	12.275	27703	24459	507668
Mbuti.DG	AR_Xianbei_IA	Kolyma_M	DST_total	0.0066	12.279	18450	16256	332396
Mbuti.DG	Boisman_MN	Eskimo_Chaplin.DG	DST_total	0.004273	12.283	51545	47454	957578
Mbuti.DG	Hezhen.DG	Tu.DG	DST_total	0.003771	12.304	55729	51810	1039210
Mbuti.DG	Mongolia_N_East	UKY	DST_total	0.005587	12.319	30276	27135	562128
Mbuti.DG	AR_EN	Russia_LBA.SG	DST_total	0.011423	12.329	4108	3301	70632
Mbuti.DG	Yumin	Qihe3	DST_total	0.006482	12.33	28435	25078	517954
Mbuti.DG	Mongolia_N_North	Liangdao1	DST_total	0.004841	12.334	19309	17526	368366
Mbuti.DG	AR_Xianbei_IA	YR_LBIA	DST_total	0.004557	12.344	17700	16188	331683
Mbuti.DG	AR_Xianbei_IA	Xitoucun	DST_total	0.006684	12.345	9827	8622	180321
Mbuti.DG	AR_Xianbei_IA	GaoHuaHua	DST_total	0.005854	12.362	16141	14409	295859
Mbuti.DG	DevilsCave_N	Miao.DG	DST_total	0.003834	12.363	55599	51618	1038311
Mbuti.DG	HMMH_MN	Tibetan.SG	DST_total	0.003538	12.365	33510	31278	630847
Mbuti.DG	AR_EN	GaoHuaHua	DST_total	0.005608	12.384	16734	14992	310792
Mbuti.DG	AR_EN	UstIda_LN	DST_total	0.005511	12.392	17540	15759	323183
Mbuti.DG	Mongola.DG	UKY	DST_total	0.005246	12.396	31496	28389	592290
Mbuti.DG	YR_MN	Kolyma_M	DST_total	0.004953	12.402	57808	52588	1054090
Mbuti.DG	YR_LN	Even.DG	DST_total	0.003087	12.416	54567	51361	1038699
Mbuti.DG	AR_Xianbei_IA	Baikal_EBA	DST_total	0.004813	12.424	17619	16048	326486
Mbuti.DG	Mongolia_N_East	Kolyma_M	DST_total	0.005699	12.436	51798	46483	932831
Mbuti.DG	HMMH_MN	Dushan	DST_total	0.00694	12.495	18550	16209	337254
Mbuti.DG	AR_LN	Tibetan.SG	DST_total	0.005966	12.497	5602	4994	101956
Mbuti.DG	Mongolia_N_North	Kolyma_M	DST_total	0.004936	12.498	55186	50229	1004189
Mbuti.DG	AR_EN	Liangdao2	DST_total	0.007225	12.501	16007	13913	289772
Mbuti.DG	Yumin	Kinh.DG	DST_total	0.004675	12.505	43530	39739	810957
Mbuti.DG	WLR_BA_o	Korean.DG	DST_total	0.00516	12.509	38840	35105	723738
Mbuti.DG	AR_LN	Russia_EBA.SG	DST_total	0.022074	12.519	1350	906	20092
Mbuti.DG	Mongola.DG	Baikal_EBA	DST_total	0.003364	12.534	53971	50547	1017966
Mbuti.DG	WLR_MN	MiddleDorset.SG	DST_total	0.009781	12.547	4650	3867	80063
Mbuti.DG	Japanese.DG	Dushan	DST_total	0.004927	12.551	29712	27026	545085
Mbuti.DG	AR_EN	Qihe3	DST_total	0.00762	12.594	11343	9779	205257
Mbuti.DG	WLR_MN	Dushan	DST_total	0.006025	12.6	30470	27144	552149
Mbuti.DG	AR_EN	Dushan	DST_total	0.007896	12.608	11063	9494	198676
Mbuti.DG	Mongolia_N_East	Yi.DG	DST_total	0.003726	12.61	48827	45411	916998
Mbuti.DG	Eskimo_Chaplin.DG	Kazakhstan_Berel_IA	DST_total	0.005287	12.623	53378	48326	955628
Mbuti.DG	AR_LN	Karitiana.DG	DST_total	0.008399	12.624	5850	4989	102580
Mbuti.DG	AR_Xianbei_IA	UstIda_LN	DST_total	0.006103	12.625	16971	15084	309314
Mbuti.DG	Boisman_MN	Koryak.SG	DST_total	0.003742	12.626	52019	48361	977635
Mbuti.DG	WLR_BA	Eskimo_Sireniki.DG	DST_total	0.004717	12.648	30509	27824	569382
Mbuti.DG	YR_MN	Eskimo_Naukan.DG	DST_total	0.00397	12.672	55465	51362	1033586
Mbuti.DG	HMMH_MN	BaBanQinCen	DST_total	0.005294	12.712	22755	20495	426809
Mbuti.DG	WLR_LN	Eskimo_Naukan.DG	DST_total	0.004244	12.714	46427	42744	867952
Mbuti.DG	Yumin	USR	DST_total	0.006984	12.718	46445	40678	825731
Mbuti.DG	Baikal_EN	She.DG	DST_total	0.003389	12.744	55052	51530	1039159
Mbuti.DG	Mongolia_N_East	Naxi.DG	DST_total	0.003792	12.749	49096	45619	917070
Mbuti.DG	Boisman_MN	Shimao_LN	DST_total	0.003639	12.784	51390	47864	968840
Mbuti.DG	AR_Xianbei_IA	Sherpa.DG	DST_total	0.005646	12.794	17766	15921	326821
Mbuti.DG	Miaozigou_MN	Nahua.DG	DST_total	0.006907	12.795	17359	15223	309260
Mbuti.DG	Mongolia_N_East	Eskimo_Sireniki.DG	DST_total	0.004361	12.8	49579	45580	917022
Mbuti.DG	WLR_BA	Longlin	DST_total	0.009173	12.817	7632	6411	133125
Mbuti.DG	Mongola.DG	MiddleDorset.SG	DST_total	0.008484	12.825	4533	3862	79057
Mbuti.DG	AR_EN	Atayal.DG	DST_total	0.006067	12.835	18439	16372	340769
Mbuti.DG	Japanese.DG	Eskimo_Sireniki.DG	DST_total	0.003921	12.861	55736	51660	1039288
Mbuti.DG	YR_LN	Itelman.DG	DST_total	0.004045	12.879	55517	51322	1037228
Mbuti.DG	Korean.DG	Eskimo_Sireniki.DG	DST_total	0.004167	12.884	55827	51497	1039250
Mbuti.DG	Oroqen.DG	Liangdao1	DST_total	0.00554	12.893	19331	17306	365606
Mbuti.DG	DevilsCave_N	Sherpa.DG	DST_total	0.004463	12.921	56248	51614	1038313
Mbuti.DG	Baikal_EN	Tujia.DG	DST_total	0.003361	12.925	54979	51486	1039229
Mbuti.DG	Mongola.DG	Qihe3	DST_total	0.005021	12.954	31575	28661	580275
Mbuti.DG	AR_Xianbei_IA	Longlin	DST_total	0.011691	12.964	4444	3565	75208
Mbuti.DG	Korean.DG	MiddleDorset.SG	DST_total	0.008556	12.972	4538	3862	79061
Mbuti.DG	Oroqen.DG	LaCen	DST_total	0.004816	12.987	41724	38003	772823
Mbuti.DG	AR_Xianbei_IA	Han.DG	DST_total	0.004634	13.001	17873	16329	333112
Mbuti.DG	YR_MN	Longlin	DST_total	0.006991	13.04	12488	10946	220470
Mbuti.DG	Boisman_MN	Itelman.DG	DST_total	0.004549	13.043	51660	47306	957224
Mbuti.DG	Hezhen.DG	MiddleDorset.SG	DST_total	0.008468	13.046	4520	3851	79061
Mbuti.DG	DevilsCave_N	Liangdao1	DST_total	0.006214	13.059	19797	17491	371140
Mbuti.DG	Baikal_EN	Japanese.DG	DST_total	0.002918	13.067	54560	51527	1039341
Mbuti.DG	HMMH_MN	USR	DST_total	0.007212	13.07	35748	31175	634083
Mbuti.DG	YR_LBIA	UKY	DST_total	0.005173	13.079	32023	28910	601821
Mbuti.DG	AR_EN	CHS.SG	DST_total	0.003942	13.094	18362	16991	347867
Mbuti.DG	HMMH_MN	Longlin	DST_total	0.009217	13.097	7416	6209	131000
Mbuti.DG	Mongolia_N_North	Tujia.DG	DST_total	0.003836	13.106	52321	48538	986152
Mbuti.DG	Eskimo_Chaplin.DG	Kyrgyz.DG	DST_total	0.005207	13.131	57496	52090	1038197
Mbuti.DG	Yumin	Clovis.SG	DST_total	0.006907	13.138	46499	40800	825198
Mbuti.DG	DevilsCave_N	LaCen	DST_total	0.005274	13.162	42760	38618	785332
Mbuti.DG	WLR_LN	Longlin	DST_total	0.007847	13.18	11252	9696	198297
Mbuti.DG	AR_Xianbei_IA	Tu.DG	DST_total	0.005523	13.215	17785	15980	326813
Mbuti.DG	Eskimo_Chaplin.DG	Qihe3	DST_total	0.006583	13.221	31937	28120	579738
Mbuti.DG	Ulchi.DG	Shenxian	DST_total	0.005338	13.246	32100	28923	595309
Mbuti.DG	Mongolia_N_North	She.DG	DST_total	0.003843	13.248	52394	48604	986090
Mbuti.DG	Miaozigou_MN	Karitiana.DG	DST_total	0.006241	13.279	17546	15577	315492
Mbuti.DG	AR_LN	Mixe.DG	DST_total	0.00872	13.291	5758	4881	100482
Mbuti.DG	AR_Xianbei_IA	Qihe3	DST_total	0.008339	13.311	10790	9185	192474
Mbuti.DG	AR_EN	Lahu.DG	DST_total	0.005435	13.331	18391	16536	341313
Mbuti.DG	Boisman_MN	Japanese.DG	DST_total	0.003309	13.336	50653	47481	958536
Mbuti.DG	Korean.DG	Kolyma_M	DST_total	0.005361	13.364	57100	51540	1037161
Mbuti.DG	Yumin	Nahua.DG	DST_total	0.006842	13.364	45262	39719	810159
Mbuti.DG	Ulchi.DG	Han.DG	DST_total	0.003328	13.369	55274	51815	1039261
Mbuti.DG	YR_MN	Eskimo_Sireniki.DG	DST_total	0.004104	13.393	55432	51189	1033604
Mbuti.DG	Mongola.DG	Nahua.DG	DST_total	0.005446	13.406	57691	52038	1038083
Mbuti.DG	Mongolia_N_North	Japanese.DG	DST_total	0.003189	13.417	51831	48686	986252
Mbuti.DG	YR_LBIA	Kolyma_M	DST_total	0.005047	13.435	57773	52458	1053244
Mbuti.DG	Mongolia_N_East	LaCen	DST_total	0.005003	13.439	40538	36799	747225
Mbuti.DG	YR_LBIA	MiddleDorset.SG	DST_total	0.008855	13.479	4578	3868	80186
Mbuti.DG	DevilsCave_N	MiddleDorset.SG	DST_total	0.010279	13.5	4685	3859	80325
Mbuti.DG	HMMH_MN	Kinh.DG	DST_total	0.004843	13.503	33350	30343	620796
Mbuti.DG	AR_IA	Uygur.DG	DST_total	0.010708	13.507	3237	2648	54955
Mbuti.DG	Mongolia_N_North	MiddleDorset.SG	DST_total	0.008928	13.508	4573	3866	79212
Mbuti.DG	Boisman_MN	Liangdao1	DST_total	0.005435	13.51	19321	17340	364553
Mbuti.DG	AR_EN	Kinh.DG	DST_total	0.005478	13.52	18409	16540	341301
Mbuti.DG	WLR_MN	Qihe3	DST_total	0.005991	13.524	32362	28843	587404
Mbuti.DG	DevilsCave_N	Naxi.DG	DST_total	0.004063	13.535	55815	51596	1038375
Mbuti.DG	Boisman_MN	UKY	DST_total	0.005695	13.538	31231	27927	580141
Mbuti.DG	AR_Xianbei_IA	CHB.SG	DST_total	0.00417	13.563	17758	16369	333115
Mbuti.DG	Oroqen.DG	Lahu.DG	DST_total	0.004314	13.564	56290	51808	1039125
Mbuti.DG	YR_LBIA	Eskimo_Sireniki.DG	DST_total	0.004041	13.584	55281	51107	1032906
Mbuti.DG	Mongolia_N_North	Miao.DG	DST_total	0.003584	13.589	52296	48761	986212
Mbuti.DG	Mongolia_N_East	Sherpa.DG	DST_total	0.004558	13.593	49581	45402	917014
Mbuti.DG	AR_Xianbei_IA	Dushan	DST_total	0.00869	13.598	10426	8823	184403
Mbuti.DG	AR_LN	Japan_Jomon	DST_total	0.010219	13.6	5087	4190	87728
Mbuti.DG	YR_LBIA	Eskimo_Naukan.DG	DST_total	0.00414	13.603	55441	51165	1032887
Mbuti.DG	AR_LN	Thai.DG	DST_total	0.008177	13.646	5686	4865	100481
Mbuti.DG	DevilsCave_N	Eskimo_Sireniki.DG	DST_total	0.004868	13.654	56527	51472	1038322
Mbuti.DG	YR_LN	Kolyma_M	DST_total	0.004895	13.661	58190	53005	1059275
Mbuti.DG	Oroqen.DG	Shenxian	DST_total	0.00532	13.719	32101	28934	595296
Mbuti.DG	Miaozigou_MN	Mixe.DG	DST_total	0.006409	13.72	17254	15270	309570
Mbuti.DG	Oroqen.DG	Kinh.DG	DST_total	0.00431	13.728	56259	51780	1039119
Mbuti.DG	Hezhen.DG	Liangdao2	DST_total	0.005479	13.728	45039	40516	825497
Mbuti.DG	Yumin	Karitiana.DG	DST_total	0.006031	13.738	45704	40721	826340
Mbuti.DG	Yumin	Dusun.DG	DST_total	0.005234	13.752	43987	39743	810954
Mbuti.DG	Miaozigou_MN	Japan_Jomon	DST_total	0.006552	13.752	15447	13629	277361
Mbuti.DG	Mongola.DG	Dushan	DST_total	0.005603	13.798	29808	26754	545074
Mbuti.DG	AR_IA	EHG	DST_total	0.015021	13.818	3338	2551	52377
Mbuti.DG	WLR_BA_o	Upper_YR_LN	DST_total	0.00505	13.825	39553	35843	734604
Mbuti.DG	Eskimo_Chaplin.DG	Dushan	DST_total	0.006918	13.827	30153	26386	544578
Mbuti.DG	Hezhen.DG	Tibetan.DG	DST_total	0.004148	13.828	56140	51829	1039230
Mbuti.DG	Yumin	Baojianshan	DST_total	0.006885	13.887	38457	33757	682580
Mbuti.DG	Ulchi.DG	Liangdao1	DST_total	0.006176	13.898	19425	17168	365604
Mbuti.DG	WLR_MN	Nahua.DG	DST_total	0.006256	13.9	57949	51497	1031215
Mbuti.DG	AR_EN	USR	DST_total	0.007679	13.9	19627	16958	347598
Mbuti.DG	Ulchi.DG	Sherpa.DG	DST_total	0.004559	13.908	56259	51522	1039179
Mbuti.DG	WLR_BA_o	UKY	DST_total	0.007815	13.916	23859	20473	433338
Mbuti.DG	Hezhen.DG	Tibetan.SG	DST_total	0.003132	13.929	55038	51803	1033262
Mbuti.DG	Baikal_EN	Karitiana.DG	DST_total	0.004505	13.946	58578	53793	1062305
Mbuti.DG	Mongolia_N_North	LaCen	DST_total	0.004738	13.951	41872	38191	776800
Mbuti.DG	AR_Xianbei_IA	Tibetan.DG	DST_total	0.005939	13.964	17941	16000	326824
Mbuti.DG	Oroqen.DG	Sherpa.DG	DST_total	0.004317	13.969	56073	51587	1039183
Mbuti.DG	Baikal_EN	Naxi.DG	DST_total	0.003308	13.972	55248	51809	1039357
Mbuti.DG	Boisman_MN	Even.DG	DST_total	0.003679	13.987	50830	47303	958558
Mbuti.DG	Boisman_MN	Mongola.DG	DST_total	0.003983	13.998	51039	47221	958511
Mbuti.DG	Yumin	Russia_LBA.SG	DST_total	0.009793	14.018	9578	7941	167195
Mbuti.DG	WLR_BA_o	Upper_YR_IA	DST_total	0.005517	14.021	38673	34725	715627
Mbuti.DG	WLR_BA_o	Mongola.DG	DST_total	0.005481	14.03	39077	35111	723741
Mbuti.DG	Yumin	Dai.DG	DST_total	0.004802	14.038	44424	40456	826358
Mbuti.DG	Eskimo_Chaplin.DG	Thai.DG	DST_total	0.005033	14.043	56851	51626	1038188
Mbuti.DG	Mongolia_N_North	Naxi.DG	DST_total	0.003578	14.045	52469	48940	986271
Mbuti.DG	AR_Xianbei_IA	Clovis.SG	DST_total	0.008335	14.049	19037	16270	332002
Mbuti.DG	AR_IA	Villabruna	DST_total	0.018363	14.071	3187	2315	47515
Mbuti.DG	Ulchi.DG	Naxi.DG	DST_total	0.00395	14.088	55719	51614	1039238
Mbuti.DG	Baikal_EN	Miao.DG	DST_total	0.00344	14.093	55130	51555	1039291
Mbuti.DG	Mongola.DG	Karitiana.DG	DST_total	0.005036	14.117	57297	52063	1039317
Mbuti.DG	WLR_MN	Thai.DG	DST_total	0.004799	14.134	56645	51691	1032333
Mbuti.DG	Hezhen.DG	Dusun.DG	DST_total	0.004367	14.14	56468	51929	1039163
Mbuti.DG	Mongolia_N_East	Atayal.DG	DST_total	0.005436	14.154	49809	44832	915502
Mbuti.DG	WLR_BA	Nahua.DG	DST_total	0.006558	14.168	31623	27893	568747
Mbuti.DG	AR_EN	Tu.DG	DST_total	0.005652	14.171	18411	16482	341323
Mbuti.DG	AR_Xianbei_IA	USR	DST_total	0.008165	14.178	19145	16427	332889
Mbuti.DG	Boisman_MN	Shenxian	DST_total	0.00526	14.188	32058	28939	592893
Mbuti.DG	Mongolia_N_East	Miao.DG	DST_total	0.004433	14.19	49185	45121	917013
Mbuti.DG	WLR_LN	Nahua.DG	DST_total	0.006358	14.193	48281	42769	866999
Mbuti.DG	AR_LN	Kyrgyz.DG	DST_total	0.008349	14.193	5722	4883	100478
Mbuti.DG	Yumin	Mixe.DG	DST_total	0.006298	14.214	44961	39854	811047
Mbuti.DG	WLR_BA_o	She.DG	DST_total	0.005982	14.243	39448	35119	723649
Mbuti.DG	Mongolia_N_North	Shenxian	DST_total	0.005133	14.253	32276	29198	599703
Mbuti.DG	AR_EN	Karitiana.DG	DST_total	0.006709	14.29	19326	16992	347853
Mbuti.DG	HMMH_MN	Dusun.DG	DST_total	0.005963	14.307	33873	30171	620788
Mbuti.DG	WLR_BA_o	Liangdao1	DST_total	0.008652	14.319	14697	12367	269326
Mbuti.DG	Mongolia_N_East	BaBanQinCen	DST_total	0.004725	14.363	36373	33185	674843
Mbuti.DG	WLR_BA_o	Shimao_LN	DST_total	0.005773	14.411	39556	35334	731278
Mbuti.DG	YR_LN	MiddleDorset.SG	DST_total	0.009144	14.419	4646	3911	80387
Mbuti.DG	AR_EN	Nahua.DG	DST_total	0.007618	14.433	19119	16521	340968
Mbuti.DG	Eskimo_Chaplin.DG	Japan_Jomon	DST_total	0.006454	14.439	49001	43334	877970
Mbuti.DG	Boisman_MN	MiddleDorset.SG	DST_total	0.009692	14.439	4544	3788	78050
Mbuti.DG	YR_LN	Eskimo_Naukan.DG	DST_total	0.004202	14.47	55921	51557	1038623
Mbuti.DG	HMMH_MN	Nahua.DG	DST_total	0.007493	14.473	34852	30205	620140
Mbuti.DG	AR_EN	Tibetan.SG	DST_total	0.004596	14.506	18506	16917	345793
Mbuti.DG	Eskimo_Chaplin.DG	Dali_EBA	DST_total	0.008467	14.506	44311	38112	732129
Mbuti.DG	AR_Xianbei_IA	Kinh.DG	DST_total	0.006084	14.513	17922	15934	326809
Mbuti.DG	AR_Xianbei_IA	Lahu.DG	DST_total	0.006115	14.517	17873	15874	326801
Mbuti.DG	AR_Xianbei_IA	Liangdao2	DST_total	0.007982	14.536	15264	13083	273195
Mbuti.DG	Mongolia_N_North	Sherpa.DG	DST_total	0.004147	14.55	52950	48860	986206
Mbuti.DG	Boisman_MN	Tujia.DG	DST_total	0.004072	14.577	51171	47269	958435
Mbuti.DG	Oroqen.DG	Tu.DG	DST_total	0.004512	14.58	56224	51535	1039150
Mbuti.DG	AR_IA	Turkmenistan_IA	DST_total	0.01784	14.586	3146	2283	48356
Mbuti.DG	Mongolia_N_East	Xitoucun	DST_total	0.005213	14.595	28386	25655	523833
Mbuti.DG	HMMH_MN	Clovis.SG	DST_total	0.007749	14.6	35734	30840	631543
Mbuti.DG	WLR_BA_o	Shenxian	DST_total	0.008148	14.634	24272	20717	436313
Mbuti.DG	WLR_MN	Karitiana.DG	DST_total	0.005888	14.635	58899	52687	1054997
Mbuti.DG	Baikal_EN	Clovis.SG	DST_total	0.005617	14.695	59420	53483	1056891
Mbuti.DG	Yumin	Thai.DG	DST_total	0.0059	14.698	44453	39668	810992
Mbuti.DG	AR_Xianbei_IA	Nahua.DG	DST_total	0.007952	14.711	18597	16002	326454
Mbuti.DG	Mongolia_N_East	Han.DG	DST_total	0.004017	14.72	50033	46277	934744
Mbuti.DG	AR_Xianbei_IA	CHS.SG	DST_total	0.004604	14.724	17855	16321	333115
Mbuti.DG	Mongolia_N_East	Tu.DG	DST_total	0.004702	14.752	49686	45375	916986
Mbuti.DG	Mongolia_N_North	Atayal.DG	DST_total	0.005068	14.753	53201	48212	984575
Mbuti.DG	Eskimo_Chaplin.DG	Longlin	DST_total	0.008764	14.775	12436	10533	217105
Mbuti.DG	AR_IA	Saami.DG	DST_total	0.013085	14.79	3385	2666	54954
Mbuti.DG	Baikal_EN	Liangdao1	DST_total	0.005518	14.798	19591	17541	371446
Mbuti.DG	Mongolia_N_East	Qihe3	DST_total	0.006573	14.822	31174	27483	561506
Mbuti.DG	AR_EN	Tibetan.DG	DST_total	0.005908	14.847	18546	16529	341326
Mbuti.DG	WLR_BA_o	Tujia.DG	DST_total	0.006229	14.879	39446	34938	723686
Mbuti.DG	WLR_BA	Karitiana.DG	DST_total	0.006031	14.88	32087	28586	580501
Mbuti.DG	WLR_BA	Russia_LBA.SG	DST_total	0.010858	14.888	6756	5476	117858
Mbuti.DG	WLR_BA_o	Eskimo_Sireniki.DG	DST_total	0.006481	14.899	39880	35190	723732
Mbuti.DG	Hezhen.DG	Qihe3	DST_total	0.006134	14.903	31856	28296	580284
Mbuti.DG	Baikal_EN	Atayal.DG	DST_total	0.004674	14.925	55930	51080	1037528
Mbuti.DG	Oroqen.DG	Nahua.DG	DST_total	0.006366	14.925	58442	51834	1038027
Mbuti.DG	Oroqen.DG	Tibetan.DG	DST_total	0.004627	14.941	56539	51731	1039166
Mbuti.DG	Japanese.DG	MiddleDorset.SG	DST_total	0.009334	14.954	4546	3808	79063
Mbuti.DG	Mongolia_N_East	GaoHuaHua	DST_total	0.004842	14.997	45729	41646	843348
Mbuti.DG	AR_IA	Kostenki14	DST_total	0.019006	15	3547	2533	53361
Mbuti.DG	Oroqen.DG	GaoHuaHua	DST_total	0.004578	15.015	49028	44875	907077
Mbuti.DG	Mongola.DG	USR	DST_total	0.006406	15.03	58488	51835	1038570
Mbuti.DG	Ulchi.DG	Karitiana.DG	DST_total	0.005569	15.031	57864	52076	1039248
Mbuti.DG	YR_LBIA	Longlin	DST_total	0.007198	15.042	12444	10856	220609
Mbuti.DG	HMMH_MN	Dai.DG	DST_total	0.004936	15.045	34138	31005	634566
Mbuti.DG	DevilsCave_N	GaoHuaHua	DST_total	0.004915	15.066	50176	45638	923251
Mbuti.DG	Mongolia_N_North	BaBanQinCen	DST_total	0.004304	15.072	37398	34389	698943
Mbuti.DG	Mongolia_N_East	UstIda_LN	DST_total	0.004894	15.077	47134	42903	864730
Mbuti.DG	Boisman_MN	Upper_YR_LN	DST_total	0.003671	15.094	51668	48096	973063
Mbuti.DG	YR_LN	Eskimo_Sireniki.DG	DST_total	0.00435	15.097	55889	51371	1038639
Mbuti.DG	WLR_MN	Russia_LBA.SG	DST_total	0.009276	15.114	12244	10277	212052
Mbuti.DG	Baikal_EN	Sherpa.DG	DST_total	0.004156	15.116	55877	51557	1039288
Mbuti.DG	WLR_BA_o	Japanese.DG	DST_total	0.005715	15.122	39131	34995	723766
Mbuti.DG	Ulchi.DG	Nahua.DG	DST_total	0.006415	15.122	58470	51812	1038022
Mbuti.DG	Boisman_MN	Upper_YR_IA	DST_total	0.003871	15.134	50428	46761	947457
Mbuti.DG	DevilsCave_N	Kinh.DG	DST_total	0.004887	15.138	56642	51568	1038234
Mbuti.DG	Ulchi.DG	LaCen	DST_total	0.005403	15.164	41938	37763	772832
Mbuti.DG	HMMH_MN	Karitiana.DG	DST_total	0.006769	15.167	35385	31090	634553
Mbuti.DG	Ulchi.DG	Tu.DG	DST_total	0.004693	15.175	56383	51507	1039149
Mbuti.DG	AR_EN	Dusun.DG	DST_total	0.006339	15.181	18704	16541	341312
Mbuti.DG	WLR_LN	Japan_Jomon	DST_total	0.005871	15.19	43030	38475	775824
Mbuti.DG	Baikal_EN	USR	DST_total	0.00571	15.194	59701	53640	1061544
Mbuti.DG	Mongolia_N_East	CHB.SG	DST_total	0.00337	15.219	49607	46457	934753
Mbuti.DG	WLR_MN	Longlin	DST_total	0.008973	15.219	12675	10699	220266
Mbuti.DG	WLR_BA_o	Eskimo_Naukan.DG	DST_total	0.006695	15.252	40035	35189	723722
Mbuti.DG	AR_IA	Tadjik.SG	DST_total	0.017183	15.276	3632	2671	55906
Mbuti.DG	Mongolia_N_North	Tu.DG	DST_total	0.004487	15.282	53116	48691	986177
Mbuti.DG	Baikal_EN	Nahua.DG	DST_total	0.005413	15.324	57842	52222	1038116
Mbuti.DG	HMMH_MN	Mixe.DG	DST_total	0.006934	15.345	34672	30367	620862
Mbuti.DG	WLR_LN	Russia_LBA.SG	DST_total	0.009077	15.388	10155	8528	179195
Mbuti.DG	Mongolia_N_North	GaoHuaHua	DST_total	0.004206	15.395	48019	44262	893179
Mbuti.DG	Ulchi.DG	Lahu.DG	DST_total	0.005033	15.408	56658	51428	1039116
Mbuti.DG	AR_EN	Clovis.SG	DST_total	0.008396	15.425	19813	16900	346902
Mbuti.DG	WLR_BA_o	Shandong_EN	DST_total	0.005731	15.429	36214	32340	675954
Mbuti.DG	Korean.DG	Karitiana.DG	DST_total	0.005791	15.431	57733	51714	1039306
Mbuti.DG	Mongolia_N_East	Tibetan.DG	DST_total	0.004902	15.448	49995	45499	916995
Mbuti.DG	Ulchi.DG	Kinh.DG	DST_total	0.004678	15.459	56437	51576	1039115
Mbuti.DG	AR_EN	Dai.DG	DST_total	0.005482	15.478	18782	16875	347861
Mbuti.DG	YR_LN	Longlin	DST_total	0.007148	15.511	12501	10921	221024
Mbuti.DG	Baikal_EN	Mixe.DG	DST_total	0.005071	15.542	57586	52315	1039329
Mbuti.DG	WLR_LN	Mixe.DG	DST_total	0.00604	15.546	48012	42769	867990
Mbuti.DG	YR_MN	Nahua.DG	DST_total	0.006185	15.548	57736	51351	1032428
Mbuti.DG	Korean.DG	Nahua.DG	DST_total	0.006525	15.55	58256	51483	1038083
Mbuti.DG	Japanese.DG	Nahua.DG	DST_total	0.005983	15.554	58024	51813	1038107
Mbuti.DG	AR_IA	TianShanSaka	DST_total	0.013962	15.557	3430	2660	55165
Mbuti.DG	Boisman_MN	She.DG	DST_total	0.004402	15.561	51418	47199	958373
Mbuti.DG	AR_LN	Tianyuan	DST_total	0.014585	15.571	5169	3952	83487
Mbuti.DG	AR_Xianbei_IA	Tibetan.SG	DST_total	0.004996	15.598	17938	16284	331049
Mbuti.DG	Mongola.DG	Clovis.SG	DST_total	0.006593	15.63	58330	51511	1034217
Mbuti.DG	DevilsCave_N	Lahu.DG	DST_total	0.005191	15.642	56735	51345	1038246
Mbuti.DG	DevilsCave_N	Liangdao2	DST_total	0.006323	15.672	46421	41111	839687
Mbuti.DG	AR_LN	Kazakhstan_Berel_IA	DST_total	0.011404	15.72	5617	4535	94921
Mbuti.DG	Mongola.DG	Longlin	DST_total	0.00756	15.724	12286	10643	217316
Mbuti.DG	Korean.DG	Longlin	DST_total	0.008062	15.732	12379	10627	217315
Mbuti.DG	YR_LBIA	Baojianshan	DST_total	0.005951	15.758	42811	38258	765116
Mbuti.DG	Korean.DG	Japan_Jomon	DST_total	0.005908	15.781	48948	43756	878822
Mbuti.DG	Oroqen.DG	Karitiana.DG	DST_total	0.005799	15.782	57963	51936	1039256
Mbuti.DG	Mongolia_N_North	Liangdao2	DST_total	0.005699	15.803	45313	40597	827593
Mbuti.DG	WLR_BA	Japan_Jomon	DST_total	0.006631	15.823	28610	25211	512680
Mbuti.DG	Mongola.DG	Mixe.DG	DST_total	0.005509	15.848	57613	51888	1039277
Mbuti.DG	Boisman_MN	Eskimo_Naukan.DG	DST_total	0.004893	15.856	52118	47428	958493
Mbuti.DG	Hezhen.DG	Karitiana.DG	DST_total	0.00581	15.856	57757	51718	1039318
Mbuti.DG	AR_EN	Mixe.DG	DST_total	0.007307	15.859	19070	16576	341347
Mbuti.DG	Mongolia_N_North	Han.DG	DST_total	0.003663	15.861	53502	49815	1006297
Mbuti.DG	AR_Xianbei_IA	Karitiana.DG	DST_total	0.007601	15.863	18832	16300	333109
Mbuti.DG	Miaozigou_MN	Kazakhstan_Berel_IA	DST_total	0.007929	15.878	16753	14419	294434
Mbuti.DG	Oroqen.DG	Mixe.DG	DST_total	0.005895	15.896	58123	51997	1039221
Mbuti.DG	DevilsCave_N	Tu.DG	DST_total	0.005146	15.911	56634	51291	1038273
Mbuti.DG	Mongolia_N_East	Dushan	DST_total	0.006681	15.918	29857	26272	536698
Mbuti.DG	WLR_MN	Mixe.DG	DST_total	0.006218	15.968	57750	51331	1032415
Mbuti.DG	YR_LBIA	Baikal_EBA	DST_total	0.003769	16.003	55027	51131	1033594
Mbuti.DG	YR_MN	Japan_Jomon	DST_total	0.005626	16.004	49624	44603	892414
Mbuti.DG	Boisman_MN	LaCen	DST_total	0.005225	16.02	41680	37671	767138
Mbuti.DG	Boisman_MN	Kolyma_M	DST_total	0.006277	16.036	54375	48251	975656
Mbuti.DG	Baikal_EN	Tu.DG	DST_total	0.004171	16.058	55907	51573	1039252
Mbuti.DG	Mongolia_N_North	Xitoucun	DST_total	0.004814	16.099	28864	26276	537551
Mbuti.DG	Eskimo_Chaplin.DG	Okunevo_EMBA	DST_total	0.005927	16.103	59779	53625	1038278
Mbuti.DG	Baikal_EN	CHB.SG	DST_total	0.002808	16.104	55962	52979	1062343
Mbuti.DG	Baikal_EN	Shenxian	DST_total	0.005314	16.108	32606	29385	605937
Mbuti.DG	WLR_BA_o	Miao.DG	DST_total	0.006585	16.121	39664	34898	723732
Mbuti.DG	Eskimo_Chaplin.DG	Baojianshan	DST_total	0.007778	16.121	42740	36883	752956
Mbuti.DG	Ulchi.DG	Mixe.DG	DST_total	0.006137	16.122	58258	51880	1039210
Mbuti.DG	Mongolia_N_North	USR	DST_total	0.00677	16.125	56902	50094	1005530
Mbuti.DG	Oroqen.DG	Dusun.DG	DST_total	0.005182	16.129	57031	51646	1039107
Mbuti.DG	Japanese.DG	Longlin	DST_total	0.007483	16.13	12298	10672	217319
Mbuti.DG	Ulchi.DG	Japan_Jomon	DST_total	0.006284	16.155	49300	43777	878777
Mbuti.DG	Japanese.DG	Karitiana.DG	DST_total	0.005382	16.176	57519	51925	1039348
Mbuti.DG	Baikal_EN	Russia_LBA.SG	DST_total	0.007403	16.204	12124	10544	213424
Mbuti.DG	YR_MN	Karitiana.DG	DST_total	0.005584	16.23	58577	52679	1056259
Mbuti.DG	Baikal_EN	Han.DG	DST_total	0.003399	16.252	56404	52793	1062333
Mbuti.DG	Hezhen.DG	Nahua.DG	DST_total	0.006695	16.279	58370	51420	1038092
Mbuti.DG	AR_IA	Onge.DG	DST_total	0.014146	16.28	3361	2584	54919
Mbuti.DG	WLR_BA	Mixe.DG	DST_total	0.006505	16.306	31622	27919	569388
Mbuti.DG	Eskimo_Chaplin.DG	MA1_HG.SG	DST_total	0.010141	16.35	45828	38368	735654
Mbuti.DG	YR_LN	Nahua.DG	DST_total	0.006119	16.351	58074	51725	1037452
Mbuti.DG	Mongolia_N_North	Qihe3	DST_total	0.006171	16.389	32026	28436	581639
Mbuti.DG	Yumin	Japan_Jomon	DST_total	0.007525	16.389	43434	37628	771495
Mbuti.DG	Mongolia_N_North	CHB.SG	DST_total	0.003151	16.41	53103	49932	1006307
Mbuti.DG	WLR_LN	Karitiana.DG	DST_total	0.006124	16.418	49045	43620	885803
Mbuti.DG	WLR_BA_o	Kolyma_M	DST_total	0.008821	16.426	41922	35428	736271
Mbuti.DG	WLR_BA_o	LaCen	DST_total	0.008322	16.438	31538	26845	563908
Mbuti.DG	Mongolia_N_East	Liangdao2	DST_total	0.006451	16.453	43820	38714	791521
Mbuti.DG	AR_EN	Thai.DG	DST_total	0.006748	16.457	18858	16555	341316
Mbuti.DG	Mongola.DG	Japan_Jomon	DST_total	0.005949	16.475	48847	43618	878829
Mbuti.DG	YR_LBIA	Clovis.SG	DST_total	0.006538	16.478	59222	52355	1050280
Mbuti.DG	Mongolia_N_North	Tibetan.DG	DST_total	0.004552	16.495	53396	48907	986196
Mbuti.DG	HMMH_MN	Thai.DG	DST_total	0.006286	16.5	34143	30240	620825
Mbuti.DG	HMMH_MN	Japan_Jomon	DST_total	0.007696	16.527	30206	26065	538146
Mbuti.DG	Mongolia_N_East	Tibetan.SG	DST_total	0.003912	16.532	50016	46381	929062
Mbuti.DG	Mongolia_N_East	Lahu.DG	DST_total	0.005359	16.544	50023	45110	916954
Mbuti.DG	YR_LBIA	Nahua.DG	DST_total	0.006092	16.548	57532	51246	1031730
Mbuti.DG	Mongolia_N_North	Nahua.DG	DST_total	0.006523	16.554	55304	48878	985112
Mbuti.DG	Miaozigou_MN	Kyrgyz.DG	DST_total	0.00701	16.572	17333	15163	309551
Mbuti.DG	Boisman_MN	Eskimo_Sireniki.DG	DST_total	0.005061	16.594	52129	47278	958506
Mbuti.DG	Oroqen.DG	Liangdao2	DST_total	0.006553	16.62	45575	40166	825452
Mbuti.DG	Hezhen.DG	Thai.DG	DST_total	0.004966	16.625	57026	51865	1039210
Mbuti.DG	DevilsCave_N	Nahua.DG	DST_total	0.007597	16.638	59063	51183	1037140
Mbuti.DG	WLR_BA_o	Sherpa.DG	DST_total	0.007087	16.639	40043	34914	723732
Mbuti.DG	Mongolia_N_East	USR	DST_total	0.007728	16.641	53475	46257	934050
Mbuti.DG	AR_IA	Kangju	DST_total	0.015941	16.647	3514	2641	54774
Mbuti.DG	Yumin	Kazakhstan_Berel_IA	DST_total	0.007371	16.65	44781	38954	790634
Mbuti.DG	AR_Xianbei_IA	Dai.DG	DST_total	0.006176	16.666	18289	16231	333112
Mbuti.DG	Oroqen.DG	Tibetan.SG	DST_total	0.003753	16.67	55474	51596	1033212
Mbuti.DG	AR_Xianbei_IA	Mixe.DG	DST_total	0.007831	16.714	18475	15916	326836
Mbuti.DG	WLR_BA_o	Naxi.DG	DST_total	0.006545	16.724	39727	34990	723770
Mbuti.DG	Mongola.DG	Baojianshan	DST_total	0.006785	16.738	42468	37354	753680
Mbuti.DG	YR_LBIA	Karitiana.DG	DST_total	0.005497	16.752	58431	52629	1055429
Mbuti.DG	Baikal_EN	LaCen	DST_total	0.00524	16.784	42509	38390	786032
Mbuti.DG	DevilsCave_N	Dushan	DST_total	0.007709	16.795	31133	26863	553796
Mbuti.DG	Hezhen.DG	Dushan	DST_total	0.006912	16.801	30187	26419	545079
Mbuti.DG	Japanese.DG	Mixe.DG	DST_total	0.005699	16.817	57752	51829	1039306
Mbuti.DG	Ulchi.DG	Qihe3	DST_total	0.007121	16.833	32247	28114	580247
Mbuti.DG	AR_IA	Avar.SG	DST_total	0.018518	16.842	3633	2614	55025
Mbuti.DG	WLR_MN	Japan_Jomon	DST_total	0.00673	16.874	50137	44140	891104
Mbuti.DG	Mongolia_N_East	Nahua.DG	DST_total	0.007284	16.887	51947	45276	915993
Mbuti.DG	Ulchi.DG	Tibetan.DG	DST_total	0.005286	16.889	56910	51417	1039164
Mbuti.DG	Boisman_MN	Liangdao2	DST_total	0.006155	16.931	45039	40023	815014
Mbuti.DG	DevilsCave_N	Dusun.DG	DST_total	0.005777	16.954	57394	51397	1038220
Mbuti.DG	HMMH_MN	Baojianshan	DST_total	0.008971	16.954	26516	22350	464321
Mbuti.DG	AR_IA	Polish.DG	DST_total	0.017468	16.963	3620	2662	54838
Mbuti.DG	Mongolia_N_East	Russia_LBA.SG	DST_total	0.009739	16.967	10911	9077	188330
Mbuti.DG	AR_EN	Baojianshan	DST_total	0.009742	17.001	15440	12826	268371
Mbuti.DG	AR_Xianbei_IA	Baojianshan	DST_total	0.010292	17.001	14618	12029	251561
Mbuti.DG	Mongolia_N_North	Dushan	DST_total	0.006664	17.024	30544	26875	550591
Mbuti.DG	Korean.DG	Mixe.DG	DST_total	0.006281	17.038	58047	51520	1039267
Mbuti.DG	Mongolia_N_North	Karitiana.DG	DST_total	0.005877	17.042	56032	50118	1006271
Mbuti.DG	YR_LBIA	Mixe.DG	DST_total	0.005825	17.084	57351	51334	1032926
Mbuti.DG	Mongolia_N_East	Kinh.DG	DST_total	0.005276	17.09	49968	45130	916945
Mbuti.DG	YR_LBIA	USR	DST_total	0.006789	17.096	59519	52359	1054673
Mbuti.DG	YR_MN	Mixe.DG	DST_total	0.00598	17.117	57533	51352	1033630
Mbuti.DG	Ulchi.DG	Liangdao2	DST_total	0.006712	17.161	45657	40117	825452
Mbuti.DG	Mongola.DG	UstIda_LN	DST_total	0.005028	17.218	52258	47416	963025
Mbuti.DG	AR_LN	Minoan_Odigitria	DST_total	0.025573	17.225	1784	1130	25579
Mbuti.DG	DevilsCave_N	Qihe3	DST_total	0.007371	17.237	32988	28642	589579
Mbuti.DG	Ulchi.DG	GaoHuaHua	DST_total	0.005207	17.256	49327	44604	907068
Mbuti.DG	AR_IA	Israel_Natufian	DST_total	0.024004	17.3	2063	1352	29622
Mbuti.DG	Mongolia_N_East	CHS.SG	DST_total	0.003853	17.303	49918	46316	934753
Mbuti.DG	Boisman_MN	Miao.DG	DST_total	0.004689	17.326	51568	47074	958493
Mbuti.DG	Mongolia_N_East	Clovis.SG	DST_total	0.008185	17.333	53680	46048	932377
Mbuti.DG	Mongolia_N_North	Clovis.SG	DST_total	0.007023	17.352	56958	49911	1003448
Mbuti.DG	HMMH_MN	Kyrgyz.DG	DST_total	0.00702	17.383	34670	30311	620830
Mbuti.DG	YR_LBIA	Japan_Jomon	DST_total	0.005782	17.423	49637	44476	892744
Mbuti.DG	Oroqen.DG	Dushan	DST_total	0.007518	17.449	30470	26372	545044
Mbuti.DG	AR_IA	Papuan.DG	DST_total	0.014908	17.457	3505	2671	55945
Mbuti.DG	AR_Xianbei_IA	Dusun.DG	DST_total	0.007271	17.486	18182	15806	326797
Mbuti.DG	WLR_BA_o	GaoHuaHua	DST_total	0.007505	17.516	36174	31282	651850
Mbuti.DG	HMMH_MN	Kazakhstan_Berel_IA	DST_total	0.007875	17.536	33146	28541	584727
Mbuti.DG	AR_IA	Tagar	DST_total	0.014931	17.555	3527	2695	55709
Mbuti.DG	Mongolia_N_North	Kinh.DG	DST_total	0.004948	17.563	53432	48553	986137
Mbuti.DG	Ulchi.DG	Dusun.DG	DST_total	0.00559	17.606	57255	51446	1039095
Mbuti.DG	DevilsCave_N	Karitiana.DG	DST_total	0.006982	17.607	59994	52585	1061254
Mbuti.DG	AR_IA	Namazga_CA	DST_total	0.019586	17.668	2727	1906	41956
Mbuti.DG	Baikal_EN	Lahu.DG	DST_total	0.004641	17.683	56258	51435	1039227
Mbuti.DG	AR_IA	Iran_Ganj_Dareh_Neolithic	DST_total	0.020635	17.697	3115	2163	46124
Mbuti.DG	YR_LN	Karitiana.DG	DST_total	0.005672	17.702	59007	52986	1061489
Mbuti.DG	AR_Xianbei_IA	Japan_Jomon	DST_total	0.00894	17.726	16745	14136	291747
Mbuti.DG	Hezhen.DG	Mixe.DG	DST_total	0.006494	17.744	58196	51446	1039282
Mbuti.DG	WLR_BA_o	Qihe3	DST_total	0.009785	17.745	24106	19969	422813
Mbuti.DG	Mongolia_N_North	Russia_LBA.SG	DST_total	0.008733	17.777	11572	9805	202255
Mbuti.DG	WLR_BA_o	Tu.DG	DST_total	0.007412	17.794	40192	34828	723705
Mbuti.DG	Ulchi.DG	Dushan	DST_total	0.007729	17.801	30536	26323	545054
Mbuti.DG	DevilsCave_N	Tibetan.SG	DST_total	0.004319	17.805	57129	52574	1054895
Mbuti.DG	AR_Xianbei_IA	Kazakhstan_Berel_IA	DST_total	0.009019	17.817	17937	15138	310392
Mbuti.DG	YR_LBIA	UstIda_LN	DST_total	0.00483	17.818	52985	48262	977801
Mbuti.DG	AR_EN	Japan_Jomon	DST_total	0.008987	17.84	17544	14765	309188
Mbuti.DG	WLR_BA_o	Kinh.DG	DST_total	0.007522	17.859	40257	34813	723671
Mbuti.DG	Mongolia_N_North	Lahu.DG	DST_total	0.004948	17.868	53439	48559	986146
Mbuti.DG	Boisman_MN	GaoHuaHua	DST_total	0.00491	17.894	47438	43147	874149
Mbuti.DG	Oroqen.DG	Qihe3	DST_total	0.007449	17.973	32341	28018	580251
Mbuti.DG	WLR_BA_o	Liangdao2	DST_total	0.009693	17.999	34200	28384	600008
Mbuti.DG	Baikal_EN	Kinh.DG	DST_total	0.004611	18.056	56231	51440	1039217
Mbuti.DG	AR_EN	Russia_EBA.SG	DST_total	0.01887	18.067	4474	3186	68255
Mbuti.DG	Boisman_MN	Han.DG	DST_total	0.004128	18.076	52412	48377	977691
Mbuti.DG	AR_Xianbei_IA	Thai.DG	DST_total	0.007639	18.082	18325	15828	326817
Mbuti.DG	AR_IA	Anatolia_EBA	DST_total	0.019893	18.086	3389	2376	50915
Mbuti.DG	YR_LN	Japan_Jomon	DST_total	0.005847	18.11	49896	44660	895459
Mbuti.DG	AR_IA	Iberia_MN	DST_total	0.018837	18.138	3414	2447	51351
Mbuti.DG	Baikal_EN	Tibetan.DG	DST_total	0.004593	18.139	56369	51595	1039280
Mbuti.DG	Baikal_EN	Liangdao2	DST_total	0.006023	18.152	46117	41056	840395
Mbuti.DG	AR_IA	Iceman_MN.SG	DST_total	0.020271	18.172	3713	2587	55535
Mbuti.DG	YR_LN	Mixe.DG	DST_total	0.006023	18.173	57915	51659	1038666
Mbuti.DG	DevilsCave_N	Tibetan.DG	DST_total	0.005714	18.198	57091	51158	1038297
Mbuti.DG	WLR_BA_o	Han.DG	DST_total	0.006266	18.199	40335	35711	737886
Mbuti.DG	Miaozigou_MN	Russia_EBA.SG	DST_total	0.019233	18.234	4071	2873	62292
Mbuti.DG	Mongolia_N_East	Karitiana.DG	DST_total	0.006825	18.248	52657	46278	934724
Mbuti.DG	AR_IA	TianShanHun	DST_total	0.012932	18.255	3416	2693	55945
Mbuti.DG	Mongolia_N_East	Mixe.DG	DST_total	0.007162	18.271	51824	45256	917046
Mbuti.DG	Mongolia_N_North	Mixe.DG	DST_total	0.00623	18.29	55063	48919	986244
Mbuti.DG	WLR_BA_o	Lahu.DG	DST_total	0.00766	18.301	40340	34796	723690
Mbuti.DG	AR_IA	Ust_Ishim.DG	DST_total	0.018827	18.301	3477	2487	52576
Mbuti.DG	Mongola.DG	Russia_LBA.SG	DST_total	0.009158	18.312	11918	10012	208102
Mbuti.DG	Baikal_EN	CHS.SG	DST_total	0.003196	18.323	56273	52877	1062343
Mbuti.DG	Miaozigou_MN	Tianyuan	DST_total	0.011716	18.387	15872	12776	264254
Mbuti.DG	Boisman_MN	Naxi.DG	DST_total	0.004767	18.419	51728	47159	958553
Mbuti.DG	WLR_BA_o	Nahua.DG	DST_total	0.009666	18.463	41850	34862	722955
Mbuti.DG	AR_IA	Anatolia_BA	DST_total	0.019017	18.524	3587	2571	53447
Mbuti.DG	AR_IA	WHG	DST_total	0.017292	18.537	3665	2698	55936
Mbuti.DG	Baikal_EN	BaBanQinCen	DST_total	0.004817	18.544	37956	34552	706800
Mbuti.DG	Yumin	Kyrgyz.DG	DST_total	0.007308	18.589	45336	39409	810995
Mbuti.DG	Mongola.DG	Kyrgyz.DG	DST_total	0.006003	18.602	57877	51639	1039229
Mbuti.DG	YR_MN	Russia_LBA.SG	DST_total	0.009744	18.614	12269	10200	212289
Mbuti.DG	Mongolia_N_North	Tibetan.SG	DST_total	0.003715	18.616	53567	49851	1000196
Mbuti.DG	AR_IA	Anatolia_MLBA	DST_total	0.018842	18.658	3587	2566	54181
Mbuti.DG	AR_IA	Tajik.DG	DST_total	0.016538	18.7	3549	2640	54953
Mbuti.DG	DevilsCave_N	Mixe.DG	DST_total	0.007202	18.704	58813	51335	1038351
Mbuti.DG	AR_IA	CHG	DST_total	0.020051	18.776	3785	2664	55931
Mbuti.DG	Mongolia_N_North	CHS.SG	DST_total	0.003603	18.793	53420	49794	1006307
Mbuti.DG	Ulchi.DG	Tibetan.SG	DST_total	0.004266	18.807	55769	51362	1033194
Mbuti.DG	DevilsCave_N	Longlin	DST_total	0.010163	18.808	12883	10639	220832
Mbuti.DG	WLR_BA_o	Russia_LBA.SG	DST_total	0.013175	18.865	8825	6868	148531
Mbuti.DG	Hezhen.DG	Russia_LBA.SG	DST_total	0.00969	18.872	11993	9976	208097
Mbuti.DG	Oroqen.DG	Thai.DG	DST_total	0.006052	18.929	57704	51416	1039149
Mbuti.DG	AR_Xianbei_IA	Kyrgyz.DG	DST_total	0.008156	18.939	18575	15909	326821
Mbuti.DG	AR_IA	Russian.DG	DST_total	0.016531	18.949	3554	2646	54952
Mbuti.DG	AR_IA	Poltavka	DST_total	0.016438	19.026	3594	2688	55151
Mbuti.DG	Baikal_EN	GaoHuaHua	DST_total	0.004724	19.028	49902	45537	924078
Mbuti.DG	Korean.DG	Kyrgyz.DG	DST_total	0.006178	19.118	58052	51632	1039214
Mbuti.DG	Mongolia_N_East	Longlin	DST_total	0.010427	19.136	12654	10395	216621
Mbuti.DG	WLR_LN	Kyrgyz.DG	DST_total	0.00649	19.144	48307	42674	867934
Mbuti.DG	AR_IA	PPNB	DST_total	0.022683	19.202	3086	2082	44260
Mbuti.DG	AR_IA	Minoan_Lasithi	DST_total	0.019313	19.222	3462	2459	51962
Mbuti.DG	Ulchi.DG	Russia_LBA.SG	DST_total	0.009697	19.239	12019	10001	208088
Mbuti.DG	Baikal_EN	Qihe3	DST_total	0.006608	19.256	32581	28682	590059
Mbuti.DG	Boisman_MN	Lahu.DG	DST_total	0.005677	19.303	52491	47050	958433
Mbuti.DG	AR_EN	Kazakhstan_Berel_IA	DST_total	0.009466	19.33	18729	15652	325102
Mbuti.DG	WLR_BA_o	USR	DST_total	0.010438	19.348	43215	35520	737317
Mbuti.DG	AR_IA	Corded_Ware_Germany	DST_total	0.017785	19.356	3634	2652	55230
Mbuti.DG	AR_IA	Finnish.DG	DST_total	0.016824	19.387	3583	2658	54952
Mbuti.DG	Baikal_EN	Xitoucun	DST_total	0.005313	19.4	29191	26314	541604
Mbuti.DG	Boisman_MN	Kinh.DG	DST_total	0.005425	19.42	52389	47189	958427
Mbuti.DG	AR_IA	English.DG	DST_total	0.018108	19.485	3631	2636	54950
Mbuti.DG	Baikal_EN	Dushan	DST_total	0.007043	19.544	30784	26881	554256
Mbuti.DG	WLR_BA_o	Karitiana.DG	DST_total	0.009297	19.592	42408	35548	737873
Mbuti.DG	Mongolia_N_East	Dusun.DG	DST_total	0.006441	19.598	50823	44917	916941
Mbuti.DG	Oroqen.DG	Russia_LBA.SG	DST_total	0.009514	19.609	12003	10023	208083
Mbuti.DG	YR_LBIA	Russia_LBA.SG	DST_total	0.009554	19.613	12192	10165	212119
Mbuti.DG	WLR_BA	Kyrgyz.DG	DST_total	0.0071	19.622	31801	27758	569351
Mbuti.DG	WLR_BA_o	Tibetan.DG	DST_total	0.007653	19.625	40454	34915	723718
Mbuti.DG	Oroqen.DG	Longlin	DST_total	0.010065	19.675	12605	10418	217312
Mbuti.DG	Hezhen.DG	Longlin	DST_total	0.00981	19.699	12526	10394	217314
Mbuti.DG	Boisman_MN	Qihe3	DST_total	0.007254	19.704	32018	27857	573692
Mbuti.DG	Mongolia_N_North	Longlin	DST_total	0.009219	19.753	12696	10664	220424
Mbuti.DG	Eskimo_Chaplin.DG	EHG	DST_total	0.01022	19.766	58930	49229	949225
Mbuti.DG	AR_IA	Iberia_EN	DST_total	0.018851	19.793	3537	2534	53214
Mbuti.DG	AR_EN	Kyrgyz.DG	DST_total	0.008258	19.822	19267	16448	341320
Mbuti.DG	Ulchi.DG	Longlin	DST_total	0.010117	19.858	12625	10426	217309
Mbuti.DG	Mongolia_N_East	Dai.DG	DST_total	0.005463	19.89	51081	45975	934746
Mbuti.DG	Boisman_MN	Sherpa.DG	DST_total	0.005774	19.895	52406	46872	958491
Mbuti.DG	Boisman_MN	Japan_Jomon	DST_total	0.006719	19.896	49312	43444	873400
Mbuti.DG	YR_MN	Kyrgyz.DG	DST_total	0.006228	19.909	57682	51245	1033566
Mbuti.DG	DevilsCave_N	Japan_Jomon	DST_total	0.007741	19.971	50942	44016	894736
Mbuti.DG	Baikal_EN	Tibetan.SG	DST_total	0.003628	20.004	56589	52758	1055924
Mbuti.DG	AR_Xianbei_IA	Russia_EBA.SG	DST_total	0.021151	20.029	4327	2955	64881
Mbuti.DG	DevilsCave_N	Russia_LBA.SG	DST_total	0.010906	20.038	12497	10171	213247
Mbuti.DG	WLR_MN	Kyrgyz.DG	DST_total	0.007047	20.041	58217	50941	1032352
Mbuti.DG	WLR_BA_o	Longlin	DST_total	0.013838	20.066	9810	7566	162143
Mbuti.DG	Yumin	Tianyuan	DST_total	0.011595	20.112	44494	35922	739346
Mbuti.DG	YR_LN	Russia_LBA.SG	DST_total	0.009449	20.143	12267	10251	213257
Mbuti.DG	WLR_BA	Kazakhstan_Berel_IA	DST_total	0.008298	20.145	30885	26387	542144
Mbuti.DG	AR_IA	Srubnaya	DST_total	0.017888	20.197	3677	2684	55473
Mbuti.DG	Mongolia_N_East	Kazakhstan_Berel_IA	DST_total	0.007931	20.246	50856	43834	885432
Mbuti.DG	Boisman_MN	Nahua.DG	DST_total	0.007965	20.28	54605	46980	957439
Mbuti.DG	AR_IA	Samaritan.DG	DST_total	0.021886	20.288	3742	2545	54700
Mbuti.DG	Korean.DG	Russia_LBA.SG	DST_total	0.009999	20.292	12012	9931	208099
Mbuti.DG	Oroqen.DG	Kyrgyz.DG	DST_total	0.006845	20.326	58584	51470	1039162
Mbuti.DG	Hezhen.DG	Japan_Jomon	DST_total	0.007321	20.366	49502	43068	878832
Mbuti.DG	Ulchi.DG	Thai.DG	DST_total	0.006398	20.397	57930	51281	1039137
Mbuti.DG	YR_LBIA	Kyrgyz.DG	DST_total	0.006214	20.402	57584	51166	1032869
Mbuti.DG	Mongolia_N_North	Kazakhstan_Berel_IA	DST_total	0.006944	20.449	53587	47040	942840
Mbuti.DG	Japanese.DG	Kyrgyz.DG	DST_total	0.006276	20.494	58086	51564	1039245
Mbuti.DG	Eskimo_Chaplin.DG	Saami.DG	DST_total	0.009852	20.586	63286	53058	1038222
Mbuti.DG	Boisman_MN	Tu.DG	DST_total	0.005746	20.681	52400	46893	958461
Mbuti.DG	WLR_LN	Kazakhstan_Berel_IA	DST_total	0.007851	20.739	46768	40297	824219
Mbuti.DG	Mongolia_N_East	Baojianshan	DST_total	0.008717	20.752	42148	35777	730855
Mbuti.DG	Mongolia_N_North	Dai.DG	DST_total	0.005053	20.763	54595	49510	1006297
Mbuti.DG	Yumin	AR33K	DST_total	0.012761	20.818	47005	37242	764987
Mbuti.DG	DevilsCave_N	Thai.DG	DST_total	0.00684	20.831	58179	51077	1038270
Mbuti.DG	AR_IA	Iranian.DG	DST_total	0.01895	20.937	3654	2612	54952
Mbuti.DG	AR_LN	Russia_IA.SG	DST_total	0.013588	20.957	6133	4768	100457
Mbuti.DG	Hezhen.DG	Kyrgyz.DG	DST_total	0.0068	21.069	58356	51290	1039224
Mbuti.DG	Baikal_EN	Kazakhstan_Berel_IA	DST_total	0.006621	21.096	55255	48798	975320
Mbuti.DG	AR_LN	MA1_HG.SG	DST_total	0.021044	21.121	4953	3417	72979
Mbuti.DG	Eskimo_Chaplin.DG	Tianyuan	DST_total	0.011745	21.177	50154	40361	833816
Mbuti.DG	HMMH_MN	Chukchi.DG	DST_total	0.010427	21.181	36541	30073	620230
Mbuti.DG	Baikal_EN	Longlin	DST_total	0.009256	21.223	12702	10657	221029
Mbuti.DG	Baikal_EN	Dai.DG	DST_total	0.004633	21.229	57512	52590	1062331
Mbuti.DG	AR_IA	Turkish.DG	DST_total	0.018463	21.24	3623	2608	54954
Mbuti.DG	Yumin	Chukchi.DG	DST_total	0.010293	21.261	47624	39285	810188
Mbuti.DG	WLR_BA_o	Tibetan.SG	DST_total	0.006711	21.356	40487	35564	733483
Mbuti.DG	WLR_BA_o	Mixe.DG	DST_total	0.009623	21.423	41776	34811	723753
Mbuti.DG	AR_IA	Geoksyur_EN	DST_total	0.019329	21.424	3559	2533	53076
Mbuti.DG	Eskimo_Chaplin.DG	CentralSaka	DST_total	0.00808	21.43	59660	51452	1015764
Mbuti.DG	Mongolia_N_East	Japan_Jomon	DST_total	0.008274	21.441	48295	41312	844073
Mbuti.DG	Eskimo_Chaplin.DG	Russia_EBA.SG	DST_total	0.0142	21.47	12817	9966	200762
Mbuti.DG	Boisman_MN	Karitiana.DG	DST_total	0.007409	21.503	55357	48113	977667
Mbuti.DG	Mongola.DG	Kazakhstan_Berel_IA	DST_total	0.007336	21.526	54260	47243	956543
Mbuti.DG	AR_EN	Tianyuan	DST_total	0.013454	21.538	17916	13960	294049
Mbuti.DG	Mongolia_N_North	Dusun.DG	DST_total	0.00618	21.55	54337	48242	986123
Mbuti.DG	YR_LN	Kyrgyz.DG	DST_total	0.006416	21.589	58131	51467	1038604
Mbuti.DG	Ulchi.DG	Kyrgyz.DG	DST_total	0.007172	21.61	58766	51313	1039166
Mbuti.DG	AR_IA	Spanish.DG	DST_total	0.019277	21.66	3662	2603	54948
Mbuti.DG	Boisman_MN	Russia_LBA.SG	DST_total	0.011019	21.685	11481	9314	196690
Mbuti.DG	YR_LBIA	Altai_7500BP	DST_total	0.008585	21.739	34958	29718	610350
Mbuti.DG	Eskimo_Chaplin.DG	Uygur.DG	DST_total	0.008813	21.777	61019	51869	1038217
Mbuti.DG	Mongolia_N_East	Thai.DG	DST_total	0.006969	21.801	51258	44868	916980
Mbuti.DG	Japanese.DG	Russia_LBA.SG	DST_total	0.009985	21.813	11983	9905	208107
Mbuti.DG	Eskimo_Chaplin.DG	Russia_IA.SG	DST_total	0.008359	21.82	59441	50949	1015919
Mbuti.DG	Mongolia_N_East	Kyrgyz.DG	DST_total	0.007558	21.861	51996	45066	916990
Mbuti.DG	Oroqen.DG	Japan_Jomon	DST_total	0.008001	21.869	49910	42879	878777
Mbuti.DG	WLR_BA_o	Japan_Jomon	DST_total	0.010695	21.902	37329	30487	639745
Mbuti.DG	YR_MN	Kazakhstan_Berel_IA	DST_total	0.007677	21.926	55350	47896	970908
Mbuti.DG	Boisman_MN	Dusun.DG	DST_total	0.006395	21.971	53122	46992	958414
Mbuti.DG	Miaozigou_MN	Minoan_Odigitria	DST_total	0.01969	21.979	5409	3815	80953
Mbuti.DG	AR_LN	Early_Sarmatian_IA	DST_total	0.0205	22.053	4505	3131	66987
Mbuti.DG	Mongolia_N_North	Baojianshan	DST_total	0.008294	22.076	43463	37168	758898
Mbuti.DG	Mongolia_N_North	Japan_Jomon	DST_total	0.007499	22.126	50132	43489	885862
Mbuti.DG	Boisman_MN	Tibetan.DG	DST_total	0.006246	22.175	52848	46861	958478
Mbuti.DG	AR_Xianbei_IA	Tianyuan	DST_total	0.013935	22.248	17005	13138	277494
Mbuti.DG	AR_EN	Chukchi.DG	DST_total	0.011572	22.286	20306	16360	340975
Mbuti.DG	AR_IA	Druze.DG	DST_total	0.020894	22.323	3751	2603	54950
Mbuti.DG	WLR_MN	Kazakhstan_Berel_IA	DST_total	0.008637	22.36	55819	47446	969406
Mbuti.DG	AR_LN	Onge.DG	DST_total	0.016407	22.404	6407	4759	100420
Mbuti.DG	DevilsCave_N	Kyrgyz.DG	DST_total	0.008012	22.547	59235	50916	1038287
Mbuti.DG	Boisman_MN	Mixe.DG	DST_total	0.007881	22.608	54494	46940	958531
Mbuti.DG	Mongolia_N_North	Thai.DG	DST_total	0.006423	22.619	54689	48355	986169
Mbuti.DG	HMMH_MN	Tianyuan	DST_total	0.013514	22.663	30943	24052	509910
Mbuti.DG	AR_EN	AR33K	DST_total	0.014412	22.777	19019	14587	307525
Mbuti.DG	Baikal_EN	Dusun.DG	DST_total	0.005773	22.802	57153	51153	1039201
Mbuti.DG	WLR_BA_o	Thai.DG	DST_total	0.009325	22.855	41332	34584	723701
Mbuti.DG	WLR_BA_o	Kyrgyz.DG	DST_total	0.009617	22.914	41817	34857	723710
Mbuti.DG	Boisman_MN	Longlin	DST_total	0.010357	22.998	12812	10539	219548
Mbuti.DG	AR_IA	Bell_Beaker_Germany	DST_total	0.018429	23.029	3689	2662	55742
Mbuti.DG	Korean.DG	Kazakhstan_Berel_IA	DST_total	0.008257	23.047	54729	46831	956536
Mbuti.DG	Oroqen.DG	Kazakhstan_Berel_IA	DST_total	0.00819	23.054	54895	47061	956493
Mbuti.DG	HMMH_MN	AR33K	DST_total	0.014245	23.08	33590	25854	543095
Mbuti.DG	WLR_BA	Tianyuan	DST_total	0.012749	23.145	29540	23325	487441
Mbuti.DG	Baikal_EN	Kyrgyz.DG	DST_total	0.006497	23.182	58295	51543	1039267
Mbuti.DG	AR_Xianbei_IA	Chukchi.DG	DST_total	0.011635	23.316	19544	15745	326474
Mbuti.DG	Baikal_EN	Thai.DG	DST_total	0.006103	23.383	57557	51214	1039251
Mbuti.DG	AR_Xianbei_IA	XiongNu_WE	DST_total	0.012767	23.433	18662	14712	309352
Mbuti.DG	AR_EN	XiongNu_WE	DST_total	0.012784	23.502	19370	15232	323739
Mbuti.DG	Mongolia_N_North	Kyrgyz.DG	DST_total	0.00723	23.527	55580	48450	986183
Mbuti.DG	AR_IA	LBK_EN	DST_total	0.019845	23.568	3779	2670	55877
Mbuti.DG	YR_LBIA	Kazakhstan_Berel_IA	DST_total	0.007974	23.587	55344	47604	970677
Mbuti.DG	AR_IA	Anatolia_Neolithic	DST_total	0.020065	23.634	3784	2663	55839
Mbuti.DG	Eskimo_Chaplin.DG	AR33K	DST_total	0.012904	23.686	54651	43182	888785
Mbuti.DG	WLR_BA	Russia_EBA.SG	DST_total	0.019211	23.712	7584	5376	114916
Mbuti.DG	WLR_LN	Tianyuan	DST_total	0.011957	23.723	44305	35510	735535
Mbuti.DG	HMMH_MN	Dali_EBA	DST_total	0.014484	23.734	28173	21694	447339
Mbuti.DG	Yumin	XiongNu_WE	DST_total	0.011431	23.761	45417	36677	764567
Mbuti.DG	Japanese.DG	Kazakhstan_Berel_IA	DST_total	0.007982	23.78	54602	46967	956566
Mbuti.DG	AR_IA	BMAC	DST_total	0.018943	23.907	3714	2658	55784
Mbuti.DG	AR_Xianbei_IA	AR33K	DST_total	0.015242	23.953	18290	13844	291745
Mbuti.DG	Mongola.DG	Chukchi.DG	DST_total	0.009179	24.022	60940	51410	1038160
Mbuti.DG	AR_LN	Okunevo_EMBA	DST_total	0.013458	24.034	6294	4914	102581
Mbuti.DG	Yumin	Dali_EBA	DST_total	0.013863	24.263	42026	32746	669413
Mbuti.DG	AR_Xianbei_IA	Dali_EBA	DST_total	0.015719	24.278	15763	11885	246691
Mbuti.DG	AR_LN	Israel_Natufian	DST_total	0.027175	24.319	3671	2290	50847
Mbuti.DG	AR_LN	EHG	DST_total	0.020313	24.37	6315	4397	94438
Mbuti.DG	Eskimo_Chaplin.DG	Onge.DG	DST_total	0.011875	24.428	63507	51185	1037646
Mbuti.DG	Baikal_EN	Japan_Jomon	DST_total	0.007702	24.466	50671	43773	895535
Mbuti.DG	Yumin	Russia_EBA.SG	DST_total	0.018698	24.514	10681	7634	162933
Mbuti.DG	WLR_MN	Tianyuan	DST_total	0.012768	24.538	51444	40657	844874
Mbuti.DG	HMMH_MN	XiongNu_WE	DST_total	0.011995	24.638	35229	28132	591761
Mbuti.DG	HMMH_MN	Russia_EBA.SG	DST_total	0.020139	24.643	8314	5786	125530
Mbuti.DG	Ulchi.DG	Kazakhstan_Berel_IA	DST_total	0.008651	24.688	55154	46880	956481
Mbuti.DG	AR_LN	Namazga_CA	DST_total	0.021609	24.695	5221	3554	77143
Mbuti.DG	Boisman_MN	Thai.DG	DST_total	0.007184	24.75	53704	46819	958463
Mbuti.DG	Miaozigou_MN	Russia_IA.SG	DST_total	0.010832	24.768	18413	15057	309808
Mbuti.DG	HMMH_MN	CentralSteppe_EMBA	DST_total	0.011317	24.803	37990	30809	634499
Mbuti.DG	YR_MN	Tianyuan	DST_total	0.011506	24.837	50978	41242	846174
Mbuti.DG	WLR_BA_o	Kazakhstan_Berel_IA	DST_total	0.01137	24.902	40533	32736	685706
Mbuti.DG	Boisman_MN	Tibetan.SG	DST_total	0.005168	24.919	52912	47890	971755
Mbuti.DG	Hezhen.DG	Kazakhstan_Berel_IA	DST_total	0.008651	24.941	54964	46689	956545
Mbuti.DG	YR_LN	Kazakhstan_Berel_IA	DST_total	0.008126	24.961	55788	47865	975054
Mbuti.DG	Yumin	Uygur.DG	DST_total	0.010973	24.997	48094	39195	811014
Mbuti.DG	Yumin	CentralSteppe_EMBA	DST_total	0.011265	25.003	49442	40134	826224
Mbuti.DG	AR_EN	Andronovo	DST_total	0.019878	25.017	8565	5933	132367
Mbuti.DG	AR_LN	Turkmenistan_IA	DST_total	0.022602	25.067	6033	4038	88249
Mbuti.DG	Mongola.DG	Tianyuan	DST_total	0.011929	25.119	50299	40343	834605
Mbuti.DG	Miaozigou_MN	MA1_HG.SG	DST_total	0.017197	25.134	14691	10806	225951
Mbuti.DG	AR_Xianbei_IA	CentralSteppe_EMBA	DST_total	0.012297	25.146	20254	16158	333073
Mbuti.DG	AR_EN	CentralSteppe_EMBA	DST_total	0.011908	25.15	20893	16751	347821
Mbuti.DG	AR_LN	Tadjik.SG	DST_total	0.021281	25.205	6902	4724	102387
Mbuti.DG	Eskimo_Chaplin.DG	Early_Sarmatian_IA	DST_total	0.012927	25.206	42244	33612	667747
Mbuti.DG	AR_EN	Minoan_Odigitria	DST_total	0.021578	25.214	6153	4193	90815
Mbuti.DG	AR_EN	Dali_EBA	DST_total	0.015757	25.224	16728	12582	263126
Mbuti.DG	Baikal_EN	Baojianshan	DST_total	0.00873	25.289	44057	37358	767336
Mbuti.DG	DevilsCave_N	Kazakhstan_Berel_IA	DST_total	0.009852	25.463	56909	47309	974425
Mbuti.DG	Eskimo_Chaplin.DG	Andronovo	DST_total	0.015234	25.506	24102	18298	380982
Mbuti.DG	AR_Xianbei_IA	Minoan_Odigitria	DST_total	0.022281	25.641	5842	3947	85058
Mbuti.DG	Mongolia_N_East	Tianyuan	DST_total	0.013116	25.697	49026	38556	798236
Mbuti.DG	AR_LN	Saami.DG	DST_total	0.017267	25.697	6490	4755	100483
Mbuti.DG	Eskimo_Chaplin.DG	Tadjik.SG	DST_total	0.01402	25.712	66367	51844	1035852
Mbuti.DG	Korean.DG	Tianyuan	DST_total	0.012429	25.75	50593	40221	834600
Mbuti.DG	Japanese.DG	Tianyuan	DST_total	0.012006	25.779	50410	40390	834623
Mbuti.DG	YR_LBIA	Tianyuan	DST_total	0.011775	25.953	50989	41023	846379
Mbuti.DG	Eskimo_Chaplin.DG	Villabruna	DST_total	0.015827	26.313	54381	41242	830161
Mbuti.DG	AR_Xianbei_IA	MA1_HG.SG	DST_total	0.018786	26.378	15760	11283	238297
Mbuti.DG	Miaozigou_MN	Onge.DG	DST_total	0.013189	26.459	19076	14995	309377
Mbuti.DG	Mongolia_N_East	Chukchi.DG	DST_total	0.010881	26.669	54737	44769	916095
Mbuti.DG	WLR_LN	Russia_EBA.SG	DST_total	0.017851	26.71	11385	8258	175225
Mbuti.DG	YR_LN	Tianyuan	DST_total	0.011635	26.729	51176	41299	848984
Mbuti.DG	AR_EN	MA1_HG.SG	DST_total	0.018601	26.806	16451	11799	250118
Mbuti.DG	YR_LBIA	AR33K	DST_total	0.012189	26.81	55201	44205	902199
Mbuti.DG	Eskimo_Chaplin.DG	Anatolia_IA	DST_total	0.01532	26.849	33715	25603	529511
Mbuti.DG	Mongola.DG	AR33K	DST_total	0.013002	26.911	54731	43164	889663
Mbuti.DG	AR_Xianbei_IA	Uygur.DG	DST_total	0.012689	26.919	19825	15678	326822
Mbuti.DG	Hezhen.DG	Tianyuan	DST_total	0.013125	26.96	50841	39887	834602
Mbuti.DG	HMMH_MN	Uygur.DG	DST_total	0.01171	27.028	37042	29772	620849
Mbuti.DG	Yumin	MA1_HG.SG	DST_total	0.016973	27.088	38889	28740	597959
Mbuti.DG	Miaozigou_MN	Early_Sarmatian_IA	DST_total	0.016871	27.15	13597	10074	208842
Mbuti.DG	Baikal_EN	Chukchi.DG	DST_total	0.00912	27.284	61088	51620	1038201
Mbuti.DG	DevilsCave_N	Tianyuan	DST_total	0.013826	27.344	52315	40587	848274
Mbuti.DG	Eskimo_Chaplin.DG	Turkmenistan_IA	DST_total	0.015606	27.35	57691	43852	886808
Mbuti.DG	AR_LN	Iran_Ganj_Dareh_Neolithic	DST_total	0.025167	27.351	5737	3709	80601
Mbuti.DG	HMMH_MN	Onge.DG	DST_total	0.01346	27.352	38181	29829	620495
Mbuti.DG	Boisman_MN	Kyrgyz.DG	DST_total	0.008591	27.428	54811	46577	958470
Mbuti.DG	Mongolia_N_East	AR33K	DST_total	0.013987	27.43	52587	40818	841454
Mbuti.DG	Yumin	Onge.DG	DST_total	0.013726	27.622	49949	38824	810503
Mbuti.DG	Mongolia_N_North	AR33K	DST_total	0.013125	27.652	55010	43345	888827
Mbuti.DG	AR_LN	Kostenki14	DST_total	0.025001	27.659	6820	4397	96922
Mbuti.DG	Eskimo_Chaplin.DG	Avar.SG	DST_total	0.015592	27.693	65852	50147	1007224
Mbuti.DG	Oroqen.DG	Tianyuan	DST_total	0.0138	27.694	51244	39727	834559
Mbuti.DG	AR_EN	Uygur.DG	DST_total	0.012474	27.734	20516	16258	341330
Mbuti.DG	Mongola.DG	Uygur.DG	DST_total	0.009768	27.804	61479	51328	1039236
Mbuti.DG	WLR_BA_o	Tianyuan	DST_total	0.016722	27.842	38387	28204	608987
Mbuti.DG	AR_LN	Kangju	DST_total	0.020739	27.895	6796	4713	100434
Mbuti.DG	WLR_LN	Dali_EBA	DST_total	0.013838	27.921	40910	31859	654092
Mbuti.DG	AR_LN	Iceman_MN.SG	DST_total	0.024748	27.959	7120	4606	101579
Mbuti.DG	Miaozigou_MN	Okunevo_EMBA	DST_total	0.011061	27.978	18783	15294	315498
Mbuti.DG	AR_Xianbei_IA	Russia_IA.SG	DST_total	0.012449	27.989	19780	15714	326662
Mbuti.DG	Ulchi.DG	Tianyuan	DST_total	0.0139	28.021	51357	39757	834560
Mbuti.DG	Mongola.DG	CentralSteppe_EMBA	DST_total	0.010107	28.023	61907	51404	1039164
Mbuti.DG	Eskimo_Chaplin.DG	Tagar	DST_total	0.011732	28.053	64532	52401	1033951
Mbuti.DG	Mongolia_N_North	Chukchi.DG	DST_total	0.010267	28.153	58422	48307	985192
Mbuti.DG	Baikal_EN	CentralSteppe_EMBA	DST_total	0.008838	28.172	63008	53621	1062161
Mbuti.DG	Eskimo_Chaplin.DG	Russian.DG	DST_total	0.013495	28.231	66523	52512	1038241
Mbuti.DG	Eskimo_Chaplin.DG	Minoan_Odigitria	DST_total	0.017564	28.34	16546	12145	250609
Mbuti.DG	Yumin	Russia_IA.SG	DST_total	0.011301	28.418	48372	39189	812562
Mbuti.DG	AR_LN	Papuan.DG	DST_total	0.019072	28.432	6741	4784	102581
Mbuti.DG	Eskimo_Chaplin.DG	Kostenki14	DST_total	0.017313	28.457	65191	48219	980285
Mbuti.DG	Boisman_MN	Kazakhstan_Berel_IA	DST_total	0.009609	28.484	53578	44731	920798
Mbuti.DG	AR_Xianbei_IA	CentralSaka	DST_total	0.01312	28.508	19990	15705	326596
Mbuti.DG	WLR_BA	Minoan_Odigitria	DST_total	0.019962	28.511	10032	7043	149717
Mbuti.DG	Mongolia_N_North	Tianyuan	DST_total	0.012754	28.584	51050	40360	838141
Mbuti.DG	WLR_BA	Onge.DG	DST_total	0.012947	28.607	34903	27536	569035
Mbuti.DG	Mongola.DG	Dali_EBA	DST_total	0.013204	28.629	45841	36165	732823
Mbuti.DG	AR_EN	Russia_IA.SG	DST_total	0.012321	28.689	20501	16292	341666
Mbuti.DG	HMMH_MN	Andronovo	DST_total	0.01892	28.706	15599	11045	240685
Mbuti.DG	HMMH_MN	Russia_IA.SG	DST_total	0.011441	28.777	37086	29977	621370
Mbuti.DG	Yumin	CentralSaka	DST_total	0.011302	28.778	48402	39264	808595
Mbuti.DG	AR_LN	TianShanSaka	DST_total	0.018477	28.813	6627	4756	101257
Mbuti.DG	Eskimo_Chaplin.DG	Polish.DG	DST_total	0.015858	28.834	68287	51853	1036319
Mbuti.DG	AR_EN	Onge.DG	DST_total	0.014928	28.901	21209	16117	341134
Mbuti.DG	HMMH_MN	MA1_HG.SG	DST_total	0.017996	28.948	29503	21385	451121
Mbuti.DG	Eskimo_Chaplin.DG	TianShanHun	DST_total	0.010283	28.987	62998	52322	1038291
Mbuti.DG	AR_EN	CentralSaka	DST_total	0.012525	28.989	20589	16317	341087
Mbuti.DG	Mongola.DG	XiongNu_WE	DST_total	0.010812	29.052	57112	46705	962520
Mbuti.DG	Eskimo_Chaplin.DG	Finnish.DG	DST_total	0.013927	29.053	66809	52348	1038270
Mbuti.DG	YR_LBIA	Chukchi.DG	DST_total	0.010315	29.065	61007	50364	1031814
Mbuti.DG	Eskimo_Chaplin.DG	Ust_Ishim.DG	DST_total	0.01745	29.077	64537	47541	973984
Mbuti.DG	WLR_MN	Russia_EBA.SG	DST_total	0.019113	29.087	13610	9686	205291
Mbuti.DG	Eskimo_Chaplin.DG	Papuan.DG	DST_total	0.014439	29.306	65668	50677	1038298
Mbuti.DG	Mongolia_N_East	Dali_EBA	DST_total	0.014545	29.38	45627	35185	717876
Mbuti.DG	WLR_BA_o	Russia_EBA.SG	DST_total	0.023718	29.42	9911	6497	143958
Mbuti.DG	AR_LN	Polish.DG	DST_total	0.022694	29.448	6941	4664	100319
Mbuti.DG	Mongolia_N_East	XiongNu_WE	DST_total	0.012283	29.48	52164	41532	865644
Mbuti.DG	WLR_LN	Onge.DG	DST_total	0.012288	29.518	52969	42309	867442
Mbuti.DG	AR_LN	PPNB	DST_total	0.026487	29.684	5498	3475	76365
Mbuti.DG	WLR_BA	MA1_HG.SG	DST_total	0.017646	29.703	27090	19752	415867
Mbuti.DG	Baikal_EN	Tianyuan	DST_total	0.012748	29.732	51645	40821	849026
Mbuti.DG	Eskimo_Chaplin.DG	Tajik.DG	DST_total	0.014371	29.737	66955	52034	1038240
Mbuti.DG	Eskimo_Chaplin.DG	Poltavka	DST_total	0.013643	29.755	65148	51341	1012012
Mbuti.DG	YR_MN	Dali_EBA	DST_total	0.013511	29.791	46656	36606	743812
Mbuti.DG	Yumin	Anatolia_IA	DST_total	0.01795	29.854	27194	19639	420912
Mbuti.DG	Mongola.DG	Russia_EBA.SG	DST_total	0.01724	29.886	13114	9649	200960
Mbuti.DG	Yumin	Okunevo_EMBA	DST_total	0.010872	29.915	49046	40062	826349
Mbuti.DG	Boisman_MN	Tianyuan	DST_total	0.013612	29.941	50835	39602	825286
Mbuti.DG	Miaozigou_MN	Tadjik.SG	DST_total	0.017638	29.979	20670	15114	315015
Mbuti.DG	Baikal_EN	Dali_EBA	DST_total	0.012103	29.985	46430	37400	746104
Mbuti.DG	AR_EN	Okunevo_EMBA	DST_total	0.011822	30.06	20773	16660	347865
Mbuti.DG	WLR_MN	MA1_HG.SG	DST_total	0.017251	30.115	48994	36112	746764
Mbuti.DG	Mongolia_N_East	CentralSteppe_EMBA	DST_total	0.011685	30.129	56694	45773	934593
Mbuti.DG	Korean.DG	Onge.DG	DST_total	0.012158	30.192	63790	51162	1038658
Mbuti.DG	YR_MN	Onge.DG	DST_total	0.011751	30.223	63149	51010	1033014
Mbuti.DG	YR_LBIA	Uygur.DG	DST_total	0.009917	30.224	61094	50851	1032887
Mbuti.DG	AR_Xianbei_IA	Onge.DG	DST_total	0.015641	30.25	20608	15499	326628
Mbuti.DG	AR_Xianbei_IA	Okunevo_EMBA	DST_total	0.012444	30.263	20186	16041	333109
Mbuti.DG	Baikal_EN	XiongNu_WE	DST_total	0.010497	30.304	58420	48098	983286
Mbuti.DG	Eskimo_Chaplin.DG	WHG	DST_total	0.014762	30.345	67508	52184	1038031
Mbuti.DG	HMMH_MN	Okunevo_EMBA	DST_total	0.0111	30.346	37754	30710	634564
Mbuti.DG	AR_LN	Samaritan.DG	DST_total	0.025688	30.349	7134	4567	99939
[truncated: 1,035 more rows]
