# Supplementary material for: Ancient Genomes Reveal the Origins and Kinship Organisation of Late Bronze Age Populations in Northeastern China
Source: Research Square preprint supplement (doi:10.21203/rs.3.rs-7908178/v1), 2026-02-11
Supplement: Supplementary file 3 [file 6caa192723f483d3b12adc97.xlsx]

## Sheet: Sheet1
Sample.ID	Skeletal element	AMS dating (BP)	nr.all	nr.rmdup	pr.endo%	n1240K	mn.Cov	GC	mt_nuc.ratio	dmg.5p1	dmg.5p2	dmg.3p1	dmg.3p2	X_ratio	Y_ratio	bio. Sex	nr_Y_SNPs	Method1_MoM	nr.MT.only	mn.cov.MT.only	cont.nolen	Yhap.	mtHap.
M6:1	Tooth		65462723	38052105	0.623492	622613	0.6129	43.97	107.9	0.0202813	0.00388577	0.0193552	0.00409726	0.910356	0.0122392	F	8770	0.168836	35737	116.494	0.01	-	B4b1a3a
M6:2	Tooth		27690855	6555349	0.258554	699130	0.1097	44.77	4392.61	0.0371503	0.00688058	0.0344301	0.00719822	0.791714	0.0124713	F	4846	0.190696	219985	775.394	0.01	-	B4b1a3a
M6:3	Tooth	2510±30	28707321	3269600	0.125504	237821	0.0349	43.33	1092.23	0.092187	0.0099382	0.0874938	0.0100891	0.385157	0.384773	M	112	0	23013	70.1674	0.05	C2b	D4
M6:4	Temporal bone		66338867	39979768	0.691731	493059	0.4322	45.49	111.38	0.0873328	0.0112716	0.0831081	0.0115584	0.400154	0.397254	M	1392	0.005967	11512	32.0795	0.01	C2b	F1b1e
M7:1	Tooth		49789203	37635221	0.80543	577011	0.5457	43.25	94.69	0.0154526	0.00302767	0.0154054	0.00317407	0.853208	0.00685028	F	6712	0.167571	14966	46.6566	0.01	-	C4a1a4a
M7:2	Tooth	2590±30	19952814	8433901	0.452787	713781	0.1317	45.65	1164.19	0.021152	0.00533767	0.0205975	0.00561929	0.371435	0.401627	M	2146	0.00381	77908	261.566	0.01	C2b1a1b1	D2
M7:3	Tooth		17989020	5355049	0.322729	625838	0.0925	45.69	2099.34	0.0396864	0.00780503	0.0380501	0.00777583	0.369409	0.410927	M	1346	0.002576	96143	327.098	0.01	C2b1a1b	D2
M7:4	Tooth		14920609	119799	0.008893	2016	0.0013	45.18	623.38	0.0668917	0.00827842	0.0645582	0.00812612	0.665811	0.0467522	F	0		35737	116.494	0.01	-	B4b1a3a
M7:5	Tooth		19501104	6095258	0.340417	614396	0.0933	45.66	5585.4	0.0401525	0.00740078	0.0391437	0.00752247	0.367553	0.397231	M	1313	0.005682	232162	827.67	0.01	C2b1a1b	F1b1b
M7:6	Limb bones		11490628	311866	0.029148	5694	0.0037	45.03	246.2	0.0549071	0.0117312	0.053668	0.0108648	0.343093	0.379124	M	0		24592	78.4659	0.01	C2b1a1b	B4c1a2
M7:7	Limb bones		18079941	1273145	0.081164	189957	0.0166	46.91	2008.91	0.0494023	0.0114915	0.0481253	0.0120512	0.361079	0.381341	M	83	0.021357	19223	59.3074	0.01	C2b	D2
