# Supplementary material for: Ancient Genomes Reveal the Origins and Kinship Organisation of Late Bronze Age Populations in Northeastern China
Source: Research Square preprint supplement (doi:10.21203/rs.3.rs-7908178/v1), 2026-02-11
Supplement: Supplementary file 4 [file 71964fa051a225c6254eda12.xlsx]

## Sheet: Sheet1
ID1	ID2	Rel	Zup	Zdown	P0_mean	Nonnormalized_P0	Nonnormalized_P0_serr	X1st_Type	Perc_Win_1stdeg_P0	OverlapNSNPs	NSNPsXNorm	KinshipCoefficient
M7:2	M6:1	Unrelated		6.23568	0.998561	0.222967	0.00330549	N/A	0.820988	70580	15759.7	0.00143897
M7:2	M6:2	Unrelated		8.46871	0.99735	0.222696	0.00240197	N/A	0.796296	80127	17891.4	0.00264986
M7:2	M6:3	Third Degree	1.01955	2.64909	0.951381	0.212432	0.003804	N/A	0.68323	27590	6160.52	0.0486193
M7:2	M6:4	Unrelated		7.68694	1.0072	0.224895	0.00293231	N/A	0.82716	55657	12427.5	-0.00719783
M7:2	M7:5	Unrelated		7.40798	0.994591	0.22208	0.00266275	N/A	0.753086	69763	15577.3	0.00540861
M7:2	M7:2	Unrelated		7.10486	0.982927	0.219476	0.00240978	N/A	0.759259	80314	17933.2	0.0170725
M7:2	M7:3	Unrelated		7.4988	0.995128	0.2222	0.00264648	N/A	0.759259	70963	15845.2	0.00487196
M7:2	M7:7	Unrelated		4.6631	0.990913	0.221259	0.004054	N/A	0.716049	21920	4894.48	0.00908704
M6:1	M6:3	Unrelated		6.27985	0.985052	0.21995	0.0028019	N/A	0.817073	132639	29616.7	0.0149482
M6:1	M6:4	Unrelated		10.2038	1.01396	0.226405	0.00235701	N/A	0.896341	270846	60476.7	-0.0139607
M6:1	M7:5	Unrelated		11.5655	1.00459	0.224314	0.00189866	N/A	0.902439	339805	75874.4	-0.00459403
M6:1	M7:1	Unrelated		9.96428	1.00368	0.224109	0.0021832	N/A	0.865854	314249	70168.1	-0.00367577
M6:1	M7:2	Unrelated		9.74467	0.990567	0.221182	0.00193203	N/A	0.804878	392505	87641.7	0.00943291
M6:1	M7:3	Unrelated		9.07956	0.998788	0.223018	0.00227574	N/A	0.878049	345744	77200.5	0.00121163
M6:1	M7:7	Unrelated		8.23935	0.994859	0.22214	0.00240132	N/A	0.810976	108382	24200.4	0.00514109
M6:2	M6:3	Third Degree	1.29415	3.65904	0.95242	0.212664	0.00281748	N/A	0.736196	168049	37523.4	0.0475797
M6:2	M6:4	Unrelated		7.85163	0.993176	0.221764	0.00247204	N/A	0.853659	309955	69209.3	0.00682393
M6:2	M7:5	Second Degree	6.81919	2.94796	0.840796	0.18774	0.00214323	N/A	0.329268	419373	93641	0.159204
M6:2	M7:1	Unrelated		9.08918	1.00205	0.223746	0.00235342	N/A	0.877301	357044	79723.7	-0.00204839
M6:2	M7:2	Third Degree	1.49889	2.96404	0.947759	0.211623	0.00312698	N/A	0.70122	478690	106886	0.0522409
M6:2	M7:3	Third Degree	2.58915	3.05069	0.940057	0.209904	0.00247445	N/A	0.676829	426448	95220.8	0.0599426
M6:2	M7:7	Third Degree	2.58651	3.39094	0.941706	0.210272	0.00233469	N/A	0.656442	139315	31107.4	0.0582945
M6:3	M6:4	Unrelated		5.83203	0.971029	0.216819	0.00248015	N/A	0.77439	109815	24520.4	0.0289713
M6:3	M7:5	Third Degree	2.10293	3.97051	0.947109	0.211478	0.00229779	N/A	0.719512	153420	34256.9	0.0528907
M6:3	M7:1	Unrelated		5.82589	0.983161	0.219528	0.00294774	N/A	0.743902	122695	27396.3	0.0168395
M6:3	M7:2	Second Degree	2.35154	5.33127	0.877555	0.195948	0.00272469	N/A	0.481707	172444	38504.7	0.122445
M7:2	M7:1	IdenticalTwins/SameIndividual	11.0067		0.495449	0.110628	0.00262814	N/A	0.901235	65074	14530.3	0.504551
M7:3	M7:7	IdenticalTwins/SameIndividual	16.3683		0.496168	0.110789	0.00175745	N/A	0.945122	131584	29381.1	0.503832
M6:4	M7:5	Unrelated		8.7059	0.988791	0.220785	0.002117	N/A	0.780488	278755	62242.7	0.0112092
M6:4	M7:1	Unrelated		10.6245	1.00725	0.224908	0.00212276	N/A	0.846626	249373	55682	-0.00725483
M6:4	M7:2	Third Degree	1.0696	5.5169	0.9586	0.214044	0.00211881	N/A	0.719512	320191	71494.9	0.0413996
M6:4	M7:3	Unrelated		6.93145	0.975573	0.217834	0.00223315	N/A	0.79878	282137	62997.8	0.024427
M6:4	M7:7	Unrelated		5.56002	0.974659	0.21763	0.00274728	N/A	0.713415	91334	20393.8	0.025341
M7:5	M7:1	Unrelated		8.69928	1.00389	0.224157	0.00250616	N/A	0.865854	313504	70001.7	-0.00388949
M7:5	M7:2	Third Degree	1.93111	4.67236	0.950473	0.212229	0.00211336	N/A	0.731707	432994	96682.4	0.0495274
M7:5	M7:3	Third Degree	2.47834	4.24864	0.945724	0.211169	0.00207456	N/A	0.72561	387718	86572.8	0.0542761
M7:5	M7:7	Third Degree	2.1106	3.71346	0.9461	0.211253	0.00239618	N/A	0.695122	129352	28882.8	0.0538996
M7:1	M7:2	Unrelated		10.0944	0.993914	0.221929	0.00193914	N/A	0.841463	361417	80700.1	0.00608591
M7:1	M7:3	Unrelated		8.97089	1.00488	0.224378	0.00245493	N/A	0.835366	319127	71257.3	-0.00487981
M6:1	M6:2	First Degree	8.04737	18.8849	0.756475	0.168912	0.00155451	Parent-offspring	0.0914634	387634	86554.1	0.243525
M7:1	M7:7	Unrelated		7.78465	1.00366	0.224105	0.00279394	N/A	0.809816	100105	22352.3	-0.00365688
M6:3	M7:3	First Degree	0.577972	15.6869	0.805837	0.179934	0.00257405	Siblings	0.371951	155207	34655.9	0.194163
M7:2	M7:3	First Degree	0.607693	17.3352	0.80615	0.180004	0.00233332	Siblings	0.481707	440091	98267.1	0.19385
M7:2	M7:7	First Degree	0.25388	16.8514	0.809717	0.1808	0.00244757	Siblings	0.481707	144408	32244.6	0.190283
M6:3	M7:7	First Degree	0.0175241	14.0495	0.812266	0.181369	0.00297622	N/A	0.343558	54094	12078.5	0.187734
