# Supplementary material for: Ancient Genomes Reveal the Origins and Kinship Organisation of Late Bronze Age Populations in Northeastern China
Source: Research Square preprint supplement (doi:10.21203/rs.3.rs-7908178/v1), 2026-02-11
Supplement: Supplementary file 5 [file 76bfb08ee2a1eb07ebfe17e1.xlsx]

## Sheet: Sheet2
ID1	ID2	nSNPs	nmismatch	pmismatch
M7:3	M7:7	28503	19871	0.69715
M7:2	M7:2	18951	8792	0.46393
M6:2	M7:3	15455	6561	0.42452
M6:1	M7:3	11978	4153	0.34672
M6:3	M7:5	49913	16744	0.33546
M6:1	M7:1	105502	35029	0.33202
M6:4	M7:7	18056	5603	0.31031
M6:3	M7:3	65970	20012	0.30335
M7:2	M7:7	56451	16494	0.29218
M7:2	M7:1	85025	24638	0.28977
M6:3	M7:7	143360	40364	0.28156
M6:1	M6:3	30720	8361	0.27217
M6:1	M6:4	172880	46918	0.27139
M6:3	M7:2	64220	17243	0.2685
M7:1	M7:2	210926	56402	0.2674
M7:2	M7:3	32789	8524	0.25997
M7:2	M6:3	123469	31436	0.25461
M7:1	M7:3	176312	44561	0.25274
M7:2	M7:7	110592	27634	0.24987
M7:5	M7:1	238999	59660	0.24962
M7:2	M6:1	120752	29681	0.2458
M7:2	M6:4	41812	10084	0.24117
M7:2	M7:5	77325	18289	0.23652
M7:1	M7:7	272384	64367	0.23631
M6:4	M7:5	272384	64367	0.23631
M6:4	M7:1	353118	82364	0.23325
M7:5	M7:7	353118	82364	0.23325
M7:2	M6:2	108544	25266	0.23277
M7:5	M7:3	256168	59380	0.2318
M6:1	M7:7	66948	15088	0.22537
M6:2	M7:5	93317	20418	0.2188
M6:2	M7:7	68320	14586	0.2135
M6:2	M6:4	98879	20764	0.20999
M6:3	M7:1	76780	15935	0.20754
M6:4	M7:2	333824	55108	0.16508
M6:2	M7:2	16418	2632	0.16031
M6:2	M6:3	35813	5673	0.15841
M6:2	M7:1	109343	16250	0.14861
M7:2	M7:3	53874	7783	0.14447
M6:1	M7:2	184147	17837	0.09686
M7:5	M7:2	214264	15936	0.07438
M6:3	M6:4	189148	10597	0.05602
M6:1	M7:5	151635	2786	0.01837
