# Supplementary material for: Ancient Genomes Reveal the Origins and Kinship Organisation of Late Bronze Age Populations in Northeastern China
Source: Research Square preprint supplement (doi:10.21203/rs.3.rs-7908178/v1), 2026-02-11
Supplement: Supplementary file 6 [file 946961805ca6858183e86a7f.xlsx]

## Sheet: Sheet1
Target	Refs1	Pval			Target	Refs1	Refs2	Pval	SSE	C1	C2	SE1	SE2
DST_total	DevilsCave_N	0.797823			DST_total	AR_LN	HMMH_MN	0.978781	1.61846e-07	0.649	0.351	0.243	0.243
DST_total	AR_LN	0.730906			DST_total	AR_Xianbei_IA	Mongolia_N_East	0.904089	9.58297e-07	2.877	-1.877	2.73	2.73
DST_total	AR_Xianbei_IA	0.450781			DST_total	AR_Xianbei_IA	AR_EN	0.815267	5.95786e-06	4.323	-3.323	36.716	36.716
DST_total	WLR_MN	0.129813			DST_total	AR_Xianbei_IA	DevilsCave_N	0.740688	1.97874e-07	0.254	0.746	0.474	0.474
DST_total	Boisman_MN	0.11044			DST_total	AR_LN	DevilsCave_N	0.70363	5.19763e-07	0.725	0.275	0.357	0.357
DST_total	Ulchi.DG	0.102175			DST_total	AR_LN	Miaozigou_MN	0.687998	1.41338e-07	0.746	0.254	0.421	0.421
DST_total	AR_EN	0.0974532			DST_total	AR_Xianbei_IA	Japanese.DG	0.664591	2.33935e-07	0.754	0.246	0.133	0.133
DST_total	Miaozigou_MN	0.0449157			DST_total	AR_LN	YR_MN	0.660898	9.26878e-07	0.887	0.113	0.268	0.268
DST_total	AR_IA	0.0328728			DST_total	AR_LN	Mongolia_N_East	0.65433	1.11234e-06	1.018	-0.018	0.432	0.432
DST_total	WLR_BA_o	0.0217257			DST_total	AR_Xianbei_IA	Baikal_EN	0.649473	8.94288e-07	1.41	-0.41	0.347	0.347
DST_total	Mongolia_N_East	0.00125284			DST_total	AR_Xianbei_IA	WLR_MN	0.64284	1.25401e-07	0.154	0.846	1.065	1.065
DST_total	Shimao_LN	0.000708043			DST_total	AR_LN	Baikal_EN	0.642246	1.67417e-06	1.12	-0.12	0.36	0.36
DST_total	WLR_BA	0.000523088			DST_total	AR_LN	WLR_MN	0.641942	8.88786e-07	0.787	0.213	1.287	1.287
DST_total	WLR_LN	4.76662e-06			DST_total	AR_LN	YR_LBIA	0.629055	1.12878e-06	0.908	0.092	0.217	0.217
DST_total	YR_MN	5.6011e-15			DST_total	AR_LN	Mongolia_N_North	0.62826	1.99831e-06	1.31	-0.31	0.722	0.722
DST_total	YR_LN	2.90182e-21			DST_total	AR_LN	YR_LN	0.621581	1.4737e-06	1.037	-0.037	0.353	0.353
DST_total	YR_LBIA	2.27662e-21			DST_total	AR_LN	Korean.DG	0.621465	1.3287e-06	0.974	0.026	0.254	0.254
					DST_total	AR_LN	Japanese.DG	0.620938	1.46159e-06	1.007	-0.007	0.381	0.381
					DST_total	AR_LN	AR_IA	0.60081	1.92865e-07	-0.937	1.937	153.917	153.917
					DST_total	AR_LN	Boisman_MN	0.56769	1.399e-06	0.97	0.03	8.815	8.815
					DST_total	AR_Xianbei_IA	Mongolia_N_North	0.566	1.56226e-06	2.09	-1.09	1.786	1.786
					DST_total	AR_LN	WLR_LN	0.553606	1.48071e-06	1.176	-0.176	0.801	0.801
					DST_total	AR_Xianbei_IA	WLR_LN	0.507966	1.85659e-07	0.641	0.359	0.184	0.184
					DST_total	AR_LN	AR_EN	0.492896	0.000291495	-22.797	23.797	16212.1	16212.1
					DST_total	AR_Xianbei_IA	HMMH_MN	0.484245	9.97227e-07	2.237	-1.237	1.961	1.961
					DST_total	AR_Xianbei_IA	Korean.DG	0.483207	3.44287e-07	0.84	0.16	0.137	0.137
					DST_total	AR_Xianbei_IA	YR_LBIA	0.474164	3.72459e-07	0.878	0.122	0.117	0.117
					DST_total	AR_Xianbei_IA	Boisman_MN	0.460114	1.0611e-06	-0.506	1.506	2.35	2.35
					DST_total	AR_Xianbei_IA	YR_LN	0.457121	3.69893e-07	0.847	0.153	0.139	0.139
					DST_total	AR_Xianbei_IA	AR_IA	0.413866	8.08481e-07	1.32	-0.32	1.847	1.847
					DST_total	AR_Xianbei_IA	YR_MN	0.381224	4.02229e-07	0.921	0.079	0.156	0.156
					DST_total	AR_LN	WLR_BA	0.337614	1.66115e-06	1.188	-0.188	1.093	1.093
					DST_total	AR_Xianbei_IA	Miaozigou_MN	0.316685	3.32102e-07	0.796	0.204	0.593	0.593
					DST_total	AR_Xianbei_IA	WLR_BA	0.125551	3.24279e-07	0.59	0.41	0.285	0.285
