# Supplementary material for: Ancient Genomes Reveal the Origins and Kinship Organisation of Late Bronze Age Populations in Northeastern China
Source: Research Square preprint supplement (doi:10.21203/rs.3.rs-7908178/v1), 2026-02-11
Supplement: Supplementary file 7 [file 9721ad66147ee08068c78de7.xlsx]

## Sheet: Sheet1
Ancient Groups	Reference
Afanasievo	Allentoft et al. 2015
AfontovaGora3	Fu et al. 2016
Alan	Damgaard et al. 2018
Altai.DG	Modern
Altai_5500BP	Wang et al, 2023
Altai_6500BP	Wang et al, 2023
Altai_7500BP	Wang et al, 2023
Ami.DG	Modern
Anatolia_BA	Lazaridis et al. 2017
Anatolia_EBA	Damgaard et al. 2018
Anatolia_IA	Damgaard et al. 2018
Anatolia_MLBA	Damgaard et al. 2018
Anatolia_Neolithic	Mathieson et al.2015
Andronovo	Allentoft et al. 2015
AR_EN	Ning et al., 2020
AR_IA	Ning et al., 2020
AR_LN	Cui et al., 2019
AR_Xianbei_IA	Ning et al., 2020
AR13-10K	Mao et al., 2021
AR14K	Mao et al., 2021
AR19K	Mao et al., 2021
AR33K	Mao et al.2021
ARpost9K	Mao et al.2021
Atayal.DG	Modern
Avar.SG	Modern
BaBanQinCen	Wang et al,2021
Baikal_EBA	Damgaard et al. 2018; Jeong et al. 2020; Yu et al. 2021
Baikal_EN	Damgaard et al. 2018; Jeong et al. 2020; Yu et al. 2021
Baojianshan	Wang et al,2021
Bell_Beaker_Germany	Mathieson et al.2015
BMAC	Narasimhan et al.2019
Boisman_MN	Wang et al,2020
Buryat.SG	Modern
CentralSaka	Damgaard et al. 2018
CentralSteppe_EMBA	Damgaard et al. 2018
Chemurchek	Jeong et al.2020; Wang et al.2020
CHG	Jones et al.2015
CHS.SG	Jones et al. 2015
Chuanyun	Yang et al,2020
Chukchi.DG	Modern
Clovis.SG	Rasmussen et al. 2014
Corded_Ware_Germany	Mathieson et al. 2015
Dai.DG	Mathieson et al. 2015
Dali_EBA	Narasimhan et al.2019
Daur.DG	Modern
DevilsCave_N	Siska et al,2017; Sikora et al,2019
Druze.DG	Modern
Dushan	Wang et al,2021
Dusun.DG	Modern
Early_Sarmatian_IA	Unterländer et al. 2017
EHG	Unterländer et al. 2017
English.DG	Mathieson et al. 2015
Eskimo_Chaplin.DG	Modern
Eskimo_Naukan.DG	Modern
Eskimo_Sireniki.DG	Modern
Even.DG	Modern
Finnish.DG	Modern
GaoHuaHua	Wang et al,2021
Geoksyur_EN	Narasimhan et al. 2019
Hadza.DG	Modern
Han.DG	Modern
Hezhen.DG	Modern
HMMH_MN	Ning et al. 2020
Iberia_EN	Mathieson et al. 2015
Iberia_MN	Mathieson et al. 2015
Iceman_MN.SG	Mathieson et al. 2015
Iran_Ganj_Dareh_Neolithic	Narasimhan et al.2019
Iranian.DG	Modern
Israel_Natufian	Lazaridis et al.2016
Itelman.DG	Modern
Japan_Jomon	Wang et al,2021
Japanese.DG	Modern
Kangju	Damgaard et al. 2018
Karitiana.DG	Modern
Kazakhstan_Berel_IA	Unterländer et al. 2017
Kinh.DG	Unterländer et al. 2017
Kolyma_M	Sikora et al,2019
Korean.DG	Modern
Koryak.SG	Modern
Kostenki14	Fu et al.2016
Kyrgyz.DG	Modern
LaCen	Wang et al,2021
Lahu.DG	Modern
LBK_EN	Mathieson et al.2015
LetuchayaMysh_7000BP	Mathieson et al. 2015
Liangdao1	Yang et al,2020
Liangdao2	Yang et al,2020
Longlin	Wang et al,2021
MA1_HG.SG	Raghavan et al. 2014
Miao.DG	Modern
Miaozigou_MN	Ning et al.2020
MiddleDorset.SG	Mao et al., 2021
Minoan_Lasithi	Lazaridis et al. 2017
Minoan_Odigitria	Lazaridis et al. 2017
Mixe.DG	Lazaridis et al. 2017
Mongola.DG	Modern
Mongolia_N_East	Wang et al,2021
Mongolia_N_North	Wang et al,2021
Nahua.DG	Modern
Namazga_CA	Damgaard et al. 2018
Naxi.DG	Modern
Okunevo_EMBA	Damgaard et al. 2018
Onge.DG	Damgaard et al. 2018
Oroqen.DG	Modern
Papuan.DG	Modern
Polish.DG	Modern
Poltavka	Mathieson et al.2015
PPNB	Mathieson et al.2015
Qihe3	Wang et al,2021
Russia_EBA.SG	Allentoft et al. 2015
Russia_IA.SG	Allentoft et al. 2015
Russia_LBA.SG	Allentoft et al. 2015
Russian.DG	Modern
Saami.DG	Modern
Samaritan.DG	Modern
Saqqaq.SG	Rasmussen et al. 2010
Shandong_EN	Yang et al,2020
She.DG	Modern
Shenxian	Wang et al,2021
Sherpa.DG	Modern
Shimao_LN	Ning et al. 2020
Spanish.DG	Modern
Srubnaya	Mathieson et al. 2015
Surui.DG	Modern
Tadjik.SG	Modern
Tagar	Damgaard et al. 2018
Tajik.DG	Modern
Thai.DG	Modern
TianShanHun	Damgaard et al. 2018
TianShanSaka	Damgaard et al. 2018
Tianyuan	Yang et al. 2017
Tibetan.DG	Modern
Tibetan.SG	Modern
Tu.DG	Modern
Tujia.DG	Modern
Turkish.DG	Modern
Turkmenistan_IA	Damgaard et al. 2018
UKY	Yu et al. 2020
Ulchi.DG	Modern
Upper_YR_IA	Ning et al. 2020
Upper_YR_LN	Ning et al. 2020
USR	Moreno-Mayar et al. 2017
Ust_Ishim.DG	Fu et al. 2014
UstIda_LN	Damgaard et al. 2018
Uygur.DG	Modern
Villabruna	Fu et al. 2016
WHG	Lazaridis et al. 2014
WLR_BA	Ning et al. 2020
WLR_BA_o	Ning et al. 2020
WLR_LN	Ning et al. 2020
WLR_MN	Ning et al. 2020
Xiaogao	Yang et al,2020
Xibo.DG	Modern
XiongNu_WE	Damgaard et al. 2018
Xitoucun	Yang et al,2020
Yakut.DG	Modern
Yamnaya_Samara	Mathieson et al. 2015
Yana_UP	Sikora et al. 2019
Yi.DG	Modern
YR_LBIA	Ning et al. 2020
YR_LN	Ning et al. 2020
YR_MN	Ning et al. 2020
YRI.SG	Modern
Yumin	Yang et al,2020
