# Supplementary material for: Ancient Genomes Reveal the Origins and Kinship Organisation of Late Bronze Age Populations in Northeastern China
Source: Research Square preprint supplement (doi:10.21203/rs.3.rs-7908178/v1), 2026-02-11
Supplement: Supplementary file 8 [file b9b09b0218771d42c8b48155.xlsx]

## Sheet: Sheet1
Ref1	Ref2	Target	f3	SE	Z	nSNPs
WLR_BA_o	DST_total	Mbuti.DG	0.332712	0.003059	108.776	626059
AR_LN	DST_total	Mbuti.DG	0.325846	0.003854	84.543	87822
AR_Xianbei_IA	DST_total	Mbuti.DG	0.323227	0.003193	101.225	282280
Boisman_MN	DST_total	Mbuti.DG	0.321938	0.002822	114.081	832298
DevilsCave_N	DST_total	Mbuti.DG	0.319585	0.00286	111.739	922843
AR_EN	DST_total	Mbuti.DG	0.31934	0.003161	101.038	292872
Ulchi.DG	DST_total	Mbuti.DG	0.318887	0.002915	109.39	904639
ARpost9K	DST_total	Mbuti.DG	0.318067	0.002764	115.065	659518
Mongolia_N_East	DST_total	Mbuti.DG	0.31801	0.002879	110.449	789537
Oroqen.DG	DST_total	Mbuti.DG	0.317484	0.002837	111.924	905088
HMMH_MN	DST_total	Mbuti.DG	0.316517	0.003006	105.291	545782
Hezhen.DG	DST_total	Mbuti.DG	0.31547	0.002905	108.59	905222
Mongolia_N_North	DST_total	Mbuti.DG	0.314853	0.002783	113.115	859384
WLR_MN	DST_total	Mbuti.DG	0.314756	0.00297	105.97	914561
AR13-10K	DST_total	Mbuti.DG	0.313434	0.002938	106.691	424266
Miaozigou_MN	DST_total	Mbuti.DG	0.312984	0.003229	96.94	267005
Baikal_EN	DST_total	Mbuti.DG	0.312224	0.002788	111.999	943150
WLR_BA	DST_total	Mbuti.DG	0.312061	0.002938	106.2	490459
Yumin	DST_total	Mbuti.DG	0.311447	0.002962	105.146	688621
Daur.DG	DST_total	Mbuti.DG	0.311334	0.002968	104.88	899528
Korean.DG	DST_total	Mbuti.DG	0.311231	0.002836	109.75	906034
AR14K	DST_total	Mbuti.DG	0.310619	0.003017	102.942	452274
Even.DG	DST_total	Mbuti.DG	0.310454	0.002847	109.04	912388
Upper_YR_LN	DST_total	Mbuti.DG	0.310034	0.002778	111.604	921572
Xibo.DG	DST_total	Mbuti.DG	0.310017	0.002851	108.756	906571
Japanese.DG	DST_total	Mbuti.DG	0.310006	0.002861	108.351	909520
Shimao_LN	DST_total	Mbuti.DG	0.30963	0.002845	108.85	910713
Shandong_EN	DST_total	Mbuti.DG	0.309372	0.002874	107.639	806686
Mongola.DG	DST_total	Mbuti.DG	0.309118	0.00282	109.628	907183
YR_LN	DST_total	Mbuti.DG	0.309021	0.002785	110.945	932417
Upper_YR_IA	DST_total	Mbuti.DG	0.308704	0.002836	108.852	883154
Koryak.SG	DST_total	Mbuti.DG	0.308697	0.002831	109.031	922849
Yakut.DG	DST_total	Mbuti.DG	0.308576	0.002931	105.266	907707
YR_LBIA	DST_total	Mbuti.DG	0.308558	0.00279	110.601	920125
WLR_LN	DST_total	Mbuti.DG	0.308414	0.002847	108.329	754585
AR_IA	DST_total	Mbuti.DG	0.307664	0.004713	65.282	46858
Han.DG	DST_total	Mbuti.DG	0.307518	0.002861	107.485	939083
YR_MN	DST_total	Mbuti.DG	0.307373	0.002794	110.002	918908
Tujia.DG	DST_total	Mbuti.DG	0.307213	0.002919	105.23	906632
CHS.SG	DST_total	Mbuti.DG	0.307157	0.002776	110.667	968491
She.DG	DST_total	Mbuti.DG	0.307134	0.002888	106.344	906067
Yi.DG	DST_total	Mbuti.DG	0.306799	0.002887	106.261	906942
Xiaogao	DST_total	Mbuti.DG	0.306474	0.002927	104.71	732883
Miao.DG	DST_total	Mbuti.DG	0.306165	0.002851	107.403	906605
Buryat.SG	DST_total	Mbuti.DG	0.306023	0.002845	107.561	923861
Saqqaq.SG	DST_total	Mbuti.DG	0.305959	0.002851	107.31	860065
Naxi.DG	DST_total	Mbuti.DG	0.305435	0.002843	107.453	910853
Eskimo_Chaplin.DG	DST_total	Mbuti.DG	0.305351	0.002933	104.113	901612
Tibetan.SG	DST_total	Mbuti.DG	0.304214	0.002758	110.321	949770
Baikal_EBA	DST_total	Mbuti.DG	0.303606	0.002812	107.977	910142
Ami.DG	DST_total	Mbuti.DG	0.303598	0.002843	106.775	906451
Baikal_BA	DST_total	Mbuti.DG	0.302831	0.00274	110.515	889762
Eskimo_Naukan.DG	DST_total	Mbuti.DG	0.302605	0.002844	106.396	907452
Eskimo_Sireniki.DG	DST_total	Mbuti.DG	0.302376	0.002821	107.18	907923
Sherpa.DG	DST_total	Mbuti.DG	0.302248	0.002828	106.867	906856
Atayal.DG	DST_total	Mbuti.DG	0.301985	0.002965	101.858	900428
Tu.DG	DST_total	Mbuti.DG	0.301422	0.002796	107.823	908334
Kinh.DG	DST_total	Mbuti.DG	0.301402	0.002877	104.771	907658
Dai.DG	DST_total	Mbuti.DG	0.301144	0.002818	106.879	938387
Lahu.DG	DST_total	Mbuti.DG	0.30066	0.002854	105.359	907124
Chuanyun	DST_total	Mbuti.DG	0.29983	0.003258	92.035	250472
AR19K	DST_total	Mbuti.DG	0.299745	0.002967	101.042	590968
