# Supplementary material for: Ancient Genomes Reveal the Origins and Kinship Organisation of Late Bronze Age Populations in Northeastern China
Source: Research Square preprint supplement (doi:10.21203/rs.3.rs-7908178/v1), 2026-02-11
Supplement: Supplementary file 9 [file cccc5b964c1220b4df5c2e4a.xlsx]

## Sheet: Sheet1
ID1	ID2	Relatedness	Second Guess	LogLikelihoodRatio	Within Degree Second Guess	Within Degree Log Likelihood Ratio	k0	k1	k2	IBD Length	IBD Number
M7:2	M6:1	Unrelated	Third Degree	14.958			1	0	0	0	1
M7:2	M6:2	Unrelated	Third Degree	14.663			1	0	0	0	1
M7:2	M6:3	Unrelated	Third Degree	1.845			0.862	0.138	0	10	3
M7:2	M6:4	Unrelated	Third Degree	13.391			1	0	0	0	1
M7:2	M7:5	Unrelated	Third Degree	10.739			1	0	0	0	1
M7:2	M7:1	Identical	Siblings	69.495			0	0	1	0	1
M7:2	M7:2	Unrelated	Third Degree	14.195			1	0	0	0	1
M7:2	M7:3	Unrelated	Third Degree	14.41			1	0	0	0	1
M7:2	M7:7	Unrelated	Third Degree	10.135			1	0	0	0	1
M6:1	M6:2	Parent-Child	Second Degree	31.513	Siblings	64.614	0	1	0	290	1
M6:1	M6:3	Unrelated	Third Degree	11.478			1	0	0	0	1
M6:1	M6:4	Unrelated	Third Degree	16.905			1	0	0	0	1
M6:1	M7:5	Unrelated	Third Degree	12.871			0.978	0.022	0	5	3
M6:1	M7:1	Unrelated	Third Degree	13.516			1	0	0	0	1
M6:1	M7:2	Unrelated	Third Degree	11.964			0.965	0.035	0	10	4
M6:1	M7:3	Unrelated	Third Degree	11.347			1	0	0	0	1
M6:1	M7:7	Unrelated	Third Degree	10.82			0.956	0.044	0	11	4
M6:2	M6:3	Unrelated	Third Degree	3.538			0.871	0.129	0	35	5
M6:2	M6:4	Unrelated	Third Degree	7.046			0.928	0.072	0	17	6
M6:2	M7:5	Second Degree	Third Degree	13.399			0.343	0.657	0	190	13
M6:2	M7:1	Unrelated	Third Degree	15.529			1	0	0	0	1
M6:2	M7:2	Third Degree	Unrelated	1.095			0.78	0.22	0	56	14
M6:2	M7:3	Third Degree	Unrelated	3.097			0.721	0.279	0	78	16
M6:2	M7:7	Third Degree	Unrelated	2.27			0.726	0.274	0	71	14
M6:3	M6:4	Unrelated	Third Degree	6.74			0.923	0.077	0	21	6
M6:3	M7:5	Unrelated	Third Degree	4.341			0.894	0.106	0	24	7
M6:3	M7:1	Unrelated	Third Degree	15.451			1	0	0	0	1
M6:3	M7:2	Second Degree	Third Degree	5.737			0.548	0.452	0	117	22
M6:3	M7:3	Second Degree	Third Degree	17.675			0.263	0.737	0	220	15
M6:3	M7:7	Second Degree	Third Degree	14.33			0.313	0.687	0	210	20
M6:4	M7:5	Unrelated	Third Degree	7.628			0.94	0.06	0	11	4
M6:4	M7:1	Unrelated	Third Degree	11.537			0.969	0.031	0	7	3
M6:4	M7:2	Unrelated	Third Degree	2.715			0.86	0.14	0	34	8
M6:4	M7:3	Unrelated	Third Degree	4.798			0.91	0.09	0	24	7
M6:4	M7:7	Unrelated	Third Degree	5.541			0.924	0.076	0	12	4
M7:5	M7:1	Unrelated	Third Degree	12.528			0.973	0.027	0	6	3
M7:5	M7:2	Unrelated	Third Degree	1.282			0.84	0.16	0	46	12
M7:5	M7:3	Unrelated	Third Degree	1.718			0.833	0.167	0	39	8
M7:5	M7:7	Third Degree	Unrelated	0.181			0.767	0.233	0	53	10
M7:1	M7:2	Unrelated	Third Degree	11.854			0.968	0.032	0	7	4
M7:1	M7:3	Unrelated	Third Degree	16.908			1	0	0	0	1
M7:1	M7:7	Unrelated	Third Degree	14.2			1	0	0	0	1
M7:2	M7:3	Siblings	Second Degree	17.728	Parent-Child	76.0256	0.381	0.468	0.152	141	33
M7:2	M7:7	Siblings	Second Degree	11.259	Parent-Child	57.2241	0.37	0.483	0.147	144	27
M7:3	M7:7	Identical	Siblings	92.659			0	0	1	0	1
