# Supplementary figures and images for: Ancient Genomes Reveal the Origins and Kinship Organisation of Late Bronze Age Populations in Northeastern China
Source: Research Square preprint supplement (doi:10.21203/rs.3.rs-7908178/v1), 2026-02-11

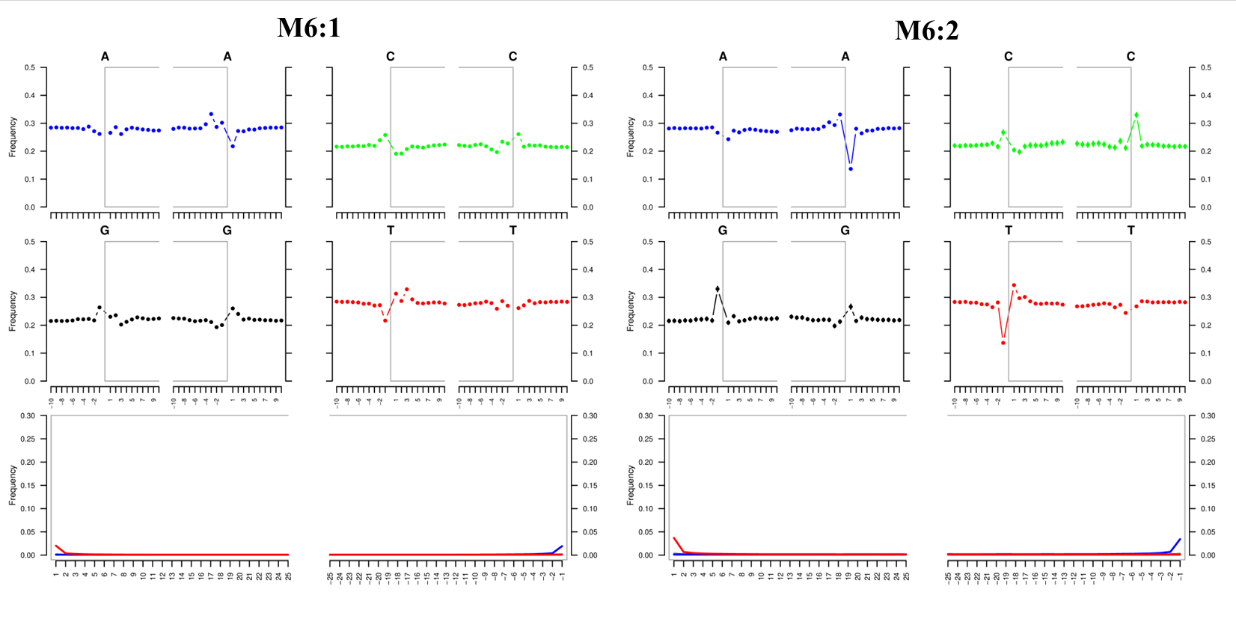


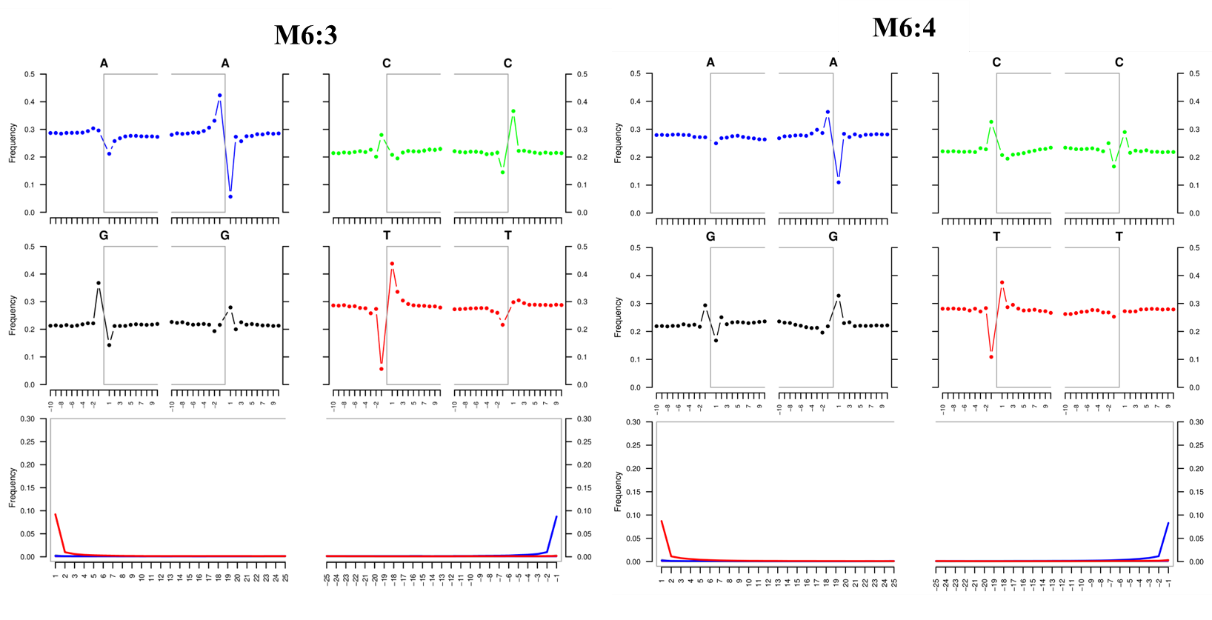


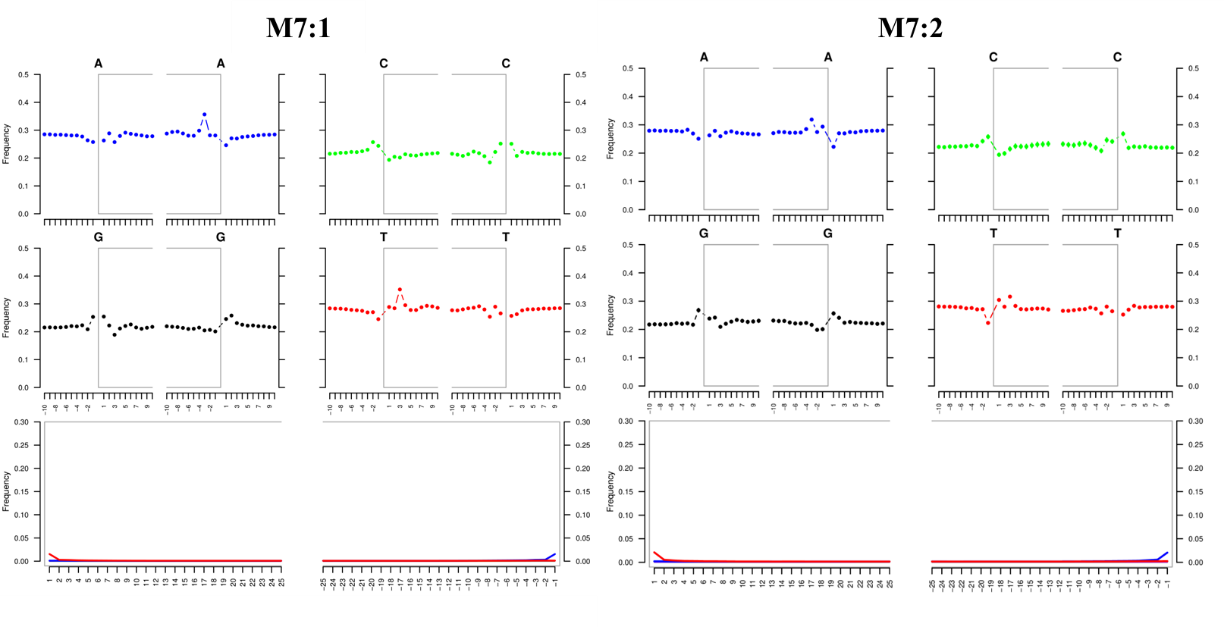


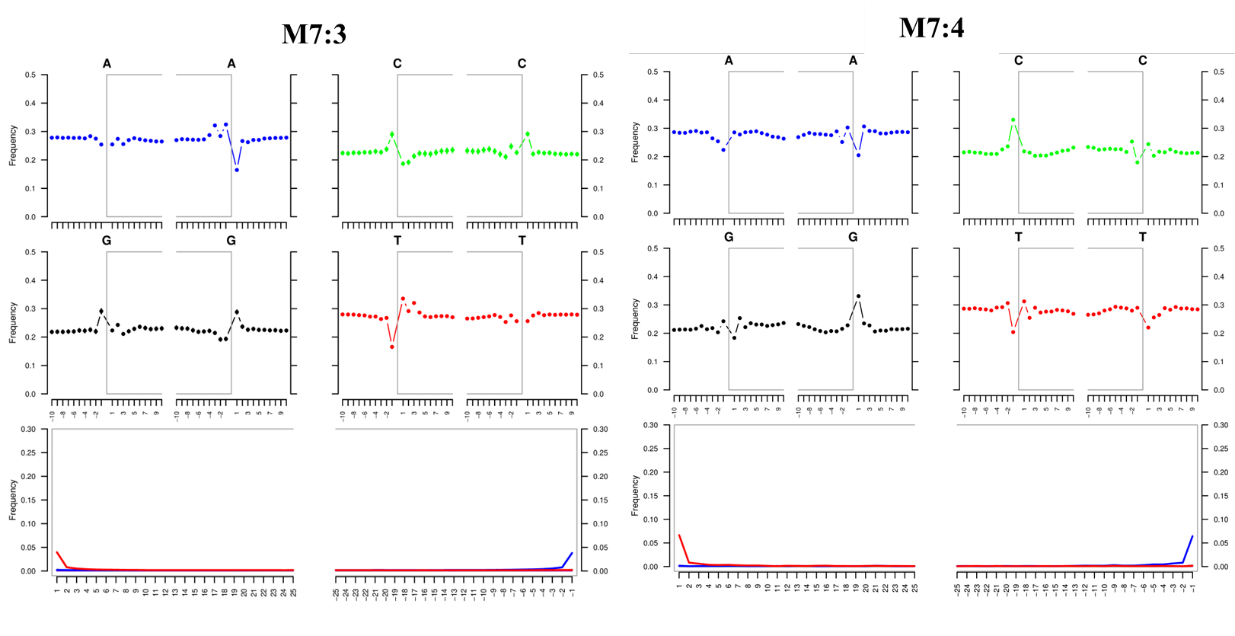


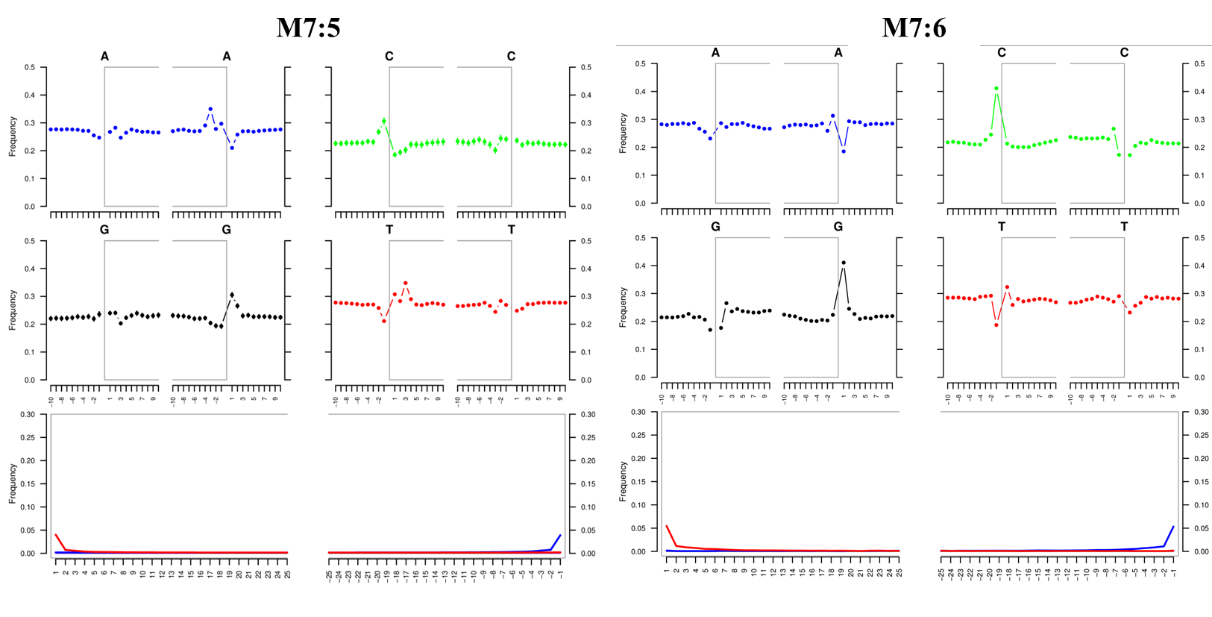


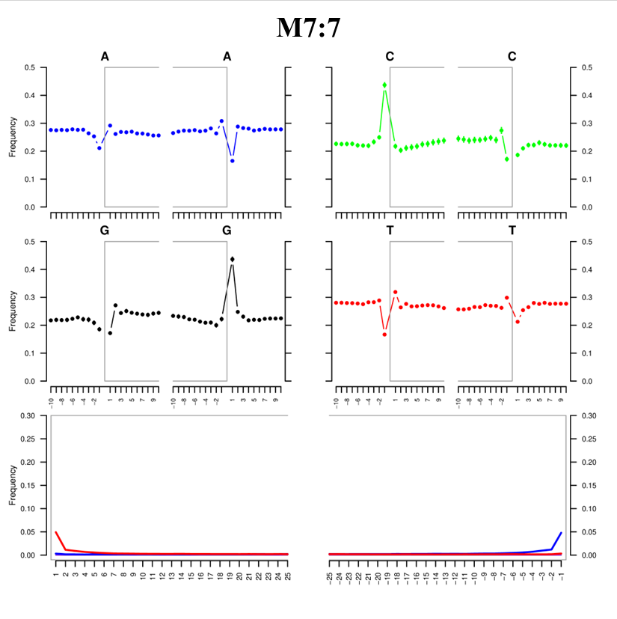


**Supplementary Figure 1 Post-mortem modifications at the 5’ and 3’ ends of all the samples.**

Supplement: Supplementary file 2 [file 44791b84f34131a26a391a59.docx]
